# Supplementary material for: Cost-effective CO2 capture based on in silico screening of zeolites and process optimization
Source: Royal Society of Chemistry journal article supplement (doi:10.1039/c3cp53627k), 2013-01-01
Supplement: c3cp53627k.pdf [file c3cp53627k.pdf]

Supplementary Information:

Cost-effective CO<sub>2</sub> capture based on *in silico* screening of zeolites and process optimization

M. M. Faruque Hasan,<sup>1</sup> Eric L. First,<sup>1</sup> and Christodoulos A. Floudas\*

Department of Chemical and Biological Engineering, Princeton University

Princeton, NJ, 08544, USA

Contents

|                                                                                                                                  |          |
|----------------------------------------------------------------------------------------------------------------------------------|----------|
| <b>Micropore diffusion of CO<sub>2</sub> and N<sub>2</sub> in zeolites</b>                                                       | <b>4</b> |
| Table S1: Analysis of mass transfer control in selected zeolites . . . . .                                                       | 4        |
| <b>Optimal process conditions and costs details</b>                                                                              | <b>5</b> |
| Table S2: Optimal purity, recovery, and cost breakdown for different zeolites . . . . .                                          | 5        |
| Table S3: Optimal conditions for the 4-step adsorption process for CO <sub>2</sub> capture using<br>different zeolites . . . . . | 7        |
| <b>Zeolites for CO<sub>2</sub> capture</b>                                                                                       | <b>9</b> |
| ABW . . . . .                                                                                                                    | 9        |
| AFG . . . . .                                                                                                                    | 11       |
| AFN . . . . .                                                                                                                    | 13       |
| AFX . . . . .                                                                                                                    | 15       |
| AHT . . . . .                                                                                                                    | 17       |
| ANA . . . . .                                                                                                                    | 19       |
| AST . . . . .                                                                                                                    | 21       |

<sup>1</sup> These authors have contributed equally.  
\* Author to whom all correspondence should be addressed; Tel: (609) 258-4595; Fax: (609) 258-0211; E-mail: floudas@titan.princeton.edu.

|               |    |
|---------------|----|
| ATN . . . . . | 23 |
| AWO . . . . . | 25 |
| BCT . . . . . | 27 |
| BIK . . . . . | 29 |
| CGF . . . . . | 31 |
| CHA . . . . . | 33 |
| DAC . . . . . | 35 |
| DFT . . . . . | 37 |
| EAB . . . . . | 39 |
| EON . . . . . | 41 |
| ERI . . . . . | 43 |
| FAR . . . . . | 45 |
| FAU . . . . . | 47 |
| FRA . . . . . | 49 |
| GIS . . . . . | 51 |
| GIU . . . . . | 53 |
| GOO . . . . . | 55 |
| IHW . . . . . | 57 |
| ITR . . . . . | 59 |
| ITW . . . . . | 61 |
| JBW . . . . . | 63 |
| LEV . . . . . | 65 |
| LOS . . . . . | 67 |
| LTA . . . . . | 69 |
| LTF . . . . . | 71 |
| MAR . . . . . | 73 |
| MEL . . . . . | 75 |
| MFI . . . . . | 77 |
| MON . . . . . | 79 |
| MOR . . . . . | 81 |

MOZ . . . . . 83

MSO . . . . . 85

MTN . . . . . 87

MVY . . . . . 89

NAB . . . . . 91

NON . . . . . 93

OFF . . . . . 95

RRO . . . . . 97

RWR . . . . . 99

RWY . . . . . 101

SAO . . . . . 103

SGT . . . . . 105

SIV . . . . . 107

SOD . . . . . 109

TOL . . . . . 111

TON . . . . . 113

VNI . . . . . 115

WEI . . . . . 117

ZON . . . . . 119

## Micropore diffusion of CO<sub>2</sub> and N<sub>2</sub> in zeolites

Table S1: Analysis of mass transfer control in selected zeolites. Micropore diffusivities are calculated for CO<sub>2</sub> and N<sub>2</sub> in selected zeolites using molecular dynamics simulations, and micropore resistances are calculated by eqn (9) in the main text. Macropore resistance is  $2.49 \times 10^{-2}$  s, from eqn (8) in the main text.

| Zeolite | Micropore diffusivity<br>(cm <sup>2</sup> /s) |                        | Micropore resistance<br>(s) |                        | Macropore/micropore<br>resistance ratio |                       |
|---------|-----------------------------------------------|------------------------|-----------------------------|------------------------|-----------------------------------------|-----------------------|
|         | CO <sub>2</sub>                               | N <sub>2</sub>         | CO <sub>2</sub>             | N <sub>2</sub>         | CO <sub>2</sub>                         | N <sub>2</sub>        |
| AFG     | $1.60 \times 10^{-8}$                         | $2.00 \times 10^{-9}$  | $8.42 \times 10^{-12}$      | $1.48 \times 10^{-9}$  | $2.96 \times 10^9$                      | $1.68 \times 10^7$    |
| AFX     | $1.00 \times 10^{-10}$                        | $1.00 \times 10^{-10}$ | $2.89 \times 10^{-9}$       | $7.68 \times 10^{-8}$  | $8.63 \times 10^6$                      | $3.24 \times 10^5$    |
| AHT     | $8.80 \times 10^{-8}$                         | $3.00 \times 10^{-9}$  | $7.56 \times 10^{-13}$      | $1.13 \times 10^{-8}$  | $3.29 \times 10^{10}$                   | $2.21 \times 10^6$    |
| ANA     | $1.00 \times 10^{-9}$                         | $1.00 \times 10^{-9}$  | $2.87 \times 10^{-8}$       | $1.75 \times 10^{-8}$  | $8.68 \times 10^5$                      | $1.42 \times 10^6$    |
| AST     | $4.00 \times 10^{-9}$                         | $2.00 \times 10^{-9}$  | $1.87 \times 10^{-10}$      | $1.64 \times 10^{-9}$  | $1.33 \times 10^8$                      | $1.52 \times 10^7$    |
| BCT     | $4.27 \times 10^{-6}$                         | $4.73 \times 10^{-7}$  | $9.05 \times 10^{-11}$      | $9.82 \times 10^{-9}$  | $2.75 \times 10^8$                      | $2.54 \times 10^6$    |
| DAC     | $1.00 \times 10^{-10}$                        | $1.00 \times 10^{-10}$ | $1.09 \times 10^{-9}$       | $6.22 \times 10^{-8}$  | $2.29 \times 10^7$                      | $4.00 \times 10^5$    |
| FAR     | $8.00 \times 10^{-9}$                         | $1.00 \times 10^{-10}$ | $4.47 \times 10^{-11}$      | $3.60 \times 10^{-8}$  | $5.57 \times 10^8$                      | $6.93 \times 10^5$    |
| FRA     | $4.00 \times 10^{-9}$                         | $1.00 \times 10^{-9}$  | $5.30 \times 10^{-11}$      | $3.19 \times 10^{-9}$  | $4.70 \times 10^8$                      | $7.80 \times 10^6$    |
| GIS     | $1.00 \times 10^{-10}$                        | $1.00 \times 10^{-10}$ | $4.32 \times 10^{-10}$      | $5.21 \times 10^{-8}$  | $5.76 \times 10^7$                      | $4.78 \times 10^5$    |
| GIU     | $2.50 \times 10^{-8}$                         | $1.00 \times 10^{-10}$ | $9.58 \times 10^{-12}$      | $3.12 \times 10^{-8}$  | $2.60 \times 10^9$                      | $7.98 \times 10^5$    |
| JBW     | $1.00 \times 10^{-10}$                        | $1.00 \times 10^{-10}$ | $4.53 \times 10^{-10}$      | $8.79 \times 10^{-8}$  | $5.50 \times 10^7$                      | $2.84 \times 10^5$    |
| LOS     | $6.60 \times 10^{-8}$                         | $1.00 \times 10^{-9}$  | $8.14 \times 10^{-13}$      | $2.79 \times 10^{-9}$  | $3.06 \times 10^{10}$                   | $8.95 \times 10^6$    |
| MAR     | $5.35 \times 10^{-7}$                         | $1.00 \times 10^{-9}$  | $8.80 \times 10^{-13}$      | $2.55 \times 10^{-9}$  | $2.83 \times 10^{10}$                   | $9.78 \times 10^6$    |
| MFI     | $5.12 \times 10^{-5}$                         | $1.58 \times 10^{-4}$  | $1.37 \times 10^{-14}$      | $8.14 \times 10^{-14}$ | $1.81 \times 10^{12}$                   | $3.06 \times 10^{11}$ |
| MSO     | $2.30 \times 10^{-8}$                         | $1.00 \times 10^{-10}$ | $2.11 \times 10^{-11}$      | $4.06 \times 10^{-8}$  | $1.18 \times 10^9$                      | $6.14 \times 10^5$    |
| MTN     | $2.00 \times 10^{-9}$                         | $1.00 \times 10^{-9}$  | $4.28 \times 10^{-10}$      | $4.55 \times 10^{-9}$  | $5.83 \times 10^7$                      | $5.48 \times 10^6$    |
| MVY     | $3.00 \times 10^{-9}$                         | $1.96 \times 10^{-6}$  | $2.27 \times 10^{-11}$      | $7.89 \times 10^{-11}$ | $1.10 \times 10^9$                      | $3.16 \times 10^8$    |
| NON     | $3.00 \times 10^{-9}$                         | $6.00 \times 10^{-9}$  | $1.68 \times 10^{-10}$      | $8.00 \times 10^{-10}$ | $1.48 \times 10^8$                      | $3.12 \times 10^7$    |
| SGT     | $5.00 \times 10^{-9}$                         | $2.00 \times 10^{-9}$  | $9.66 \times 10^{-11}$      | $1.37 \times 10^{-9}$  | $2.58 \times 10^8$                      | $1.82 \times 10^7$    |
| SIV     | $1.00 \times 10^{-10}$                        | $1.00 \times 10^{-10}$ | $7.83 \times 10^{-10}$      | $7.00 \times 10^{-8}$  | $3.18 \times 10^7$                      | $3.56 \times 10^5$    |
| SOD     | $1.00 \times 10^{-8}$                         | $1.00 \times 10^{-9}$  | $3.60 \times 10^{-11}$      | $2.07 \times 10^{-9}$  | $6.93 \times 10^8$                      | $1.20 \times 10^7$    |
| WEI     | $1.00 \times 10^{-10}$                        | $1.00 \times 10^{-10}$ | $3.81 \times 10^{-9}$       | $6.90 \times 10^{-7}$  | $6.53 \times 10^6$                      | $3.61 \times 10^4$    |

## Optimal process conditions and costs details

Table S2: Optimal purity, recovery, and cost breakdown for different zeolites. The feed is considered to be 1 kmol/s mixture of 14% CO<sub>2</sub> and 86% N<sub>2</sub>. Material cost is computed considering \$2/kg of zeolite. Costs include both CO<sub>2</sub> capture and compression. Purity, recovery, and energy penalty are at optimal cost. Energy penalty is the total energy required for separation, which is the sum of energy consumed by the feed compressor, purge vacuum pump, and vacuum pump for CO<sub>2</sub> recovery. The symbol \* next to total cost indicates that purity and/or recovery constraints were not satisfied. For these cases, we report the solution found closest to feasible based on  $MIN\sqrt{(0.90 - Pu)^2 + (0.90 - Re)^2}$ .

| Zeolite | Purity (%) | Recovery (%) | Energy penalty (kWh/ton captured) | Annualized investment cost (\$/yr) | Operating cost (\$/yr) | Material cost (\$/yr) | Total cost (\$/ton captured) |
|---------|------------|--------------|-----------------------------------|------------------------------------|------------------------|-----------------------|------------------------------|
| ABW     | 90.0       | 91.7         | 151.73                            | 2,037,607                          | 2,507,948              | 216,960               | 26.84                        |
| AFG     | 90.2       | 90.7         | 234.87                            | 2,531,091                          | 3,578,914              | 260,633               | 35.91                        |
| AFN     | 90.2       | 90.0         | 199.19                            | 2,436,006                          | 3,126,006              | 253,138               | 32.78                        |
| AFX     | 90.0       | 90.0         | 215.46                            | 2,500,722                          | 3,221,354              | 349,302               | 34.22                        |
| AHT     | 90.0       | 91.5         | 124.32                            | 1,834,905                          | 2,111,399              | 245,398               | 23.63                        |
| ANA     | 11.2       | 2.5          | 1354.00                           | 3,074,707                          | 16,159,226             | 2,576,789             | 122.94*                      |
| AST     | 70.0       | 72.5         | 223.75                            | 2,236,933                          | 3,228,416              | 258,364               | 32.26*                       |
| ATN     | 89.5       | 82.6         | 213.47                            | 2,827,156                          | 3,282,942              | 654,455               | 38.13*                       |
| AWO     | 92.0       | 90.8         | 164.27                            | 2,012,198                          | 2,609,639              | 191,895               | 27.13                        |
| BCT     | 0.2        | 0.0          | 804.37                            | 1,213,527                          | 9,577,250              | 587,198               | 64.13*                       |
| BIK     | 93.8       | 90.0         | 169.68                            | 2,098,183                          | 2,583,588              | 337,543               | 28.29                        |
| CGF     | 90.1       | 90.5         | 210.65                            | 2,332,301                          | 3,229,208              | 260,269               | 32.82                        |
| CHA     | 90.0       | 90.0         | 208.20                            | 2,464,853                          | 3,177,808              | 315,588               | 33.59                        |
| DAC     | 90.4       | 91.6         | 196.20                            | 2,646,627                          | 3,106,511              | 445,765               | 34.94                        |
| DFT     | 90.0       | 90.0         | 239.24                            | 3,007,169                          | 3,754,768              | 510,730               | 40.99                        |
| EAB     | 90.0       | 90.0         | 191.03                            | 3,199,209                          | 3,021,596              | 1,056,843             | 41.02                        |
| EON     | 90.0       | 90.0         | 223.97                            | 2,403,643                          | 3,383,436              | 269,654               | 34.14                        |
| ERI     | 90.1       | 91.3         | 179.26                            | 2,204,757                          | 2,847,474              | 225,191               | 29.75                        |
| FAR     | 90.0       | 90.0         | 233.72                            | 3,216,946                          | 3,903,270              | 233,851               | 41.45                        |
| FAU     | 47.3       | 36.5         | 293.02                            | 2,889,409                          | 4,141,293              | 672,923               | 43.42*                       |
| FRA     | 90.2       | 88.9         | 246.09                            | 4,290,961                          | 4,127,270              | 600,098               | 50.83*                       |

|     |      |      |        |           |           |         |                    |
|-----|------|------|--------|-----------|-----------|---------|--------------------|
| GIS | 90.0 | 90.9 | 159.39 | 2,397,742 | 2,731,782 | 289,759 | 30.55              |
| GIU | 90.0 | 90.0 | 220.15 | 2,684,860 | 3,346,817 | 422,565 | 36.38              |
| GOO | 90.0 | 90.0 | 188.87 | 2,356,454 | 2,965,301 | 357,429 | 32.01              |
| IHW | 90.0 | 90.0 | 188.95 | 2,312,687 | 3,006,939 | 226,496 | 31.26              |
| ITR | 90.2 | 85.4 | 217.79 | 3,005,169 | 3,553,528 | 168,181 | 37.92 <sup>*</sup> |
| ITW | 90.3 | 92.0 | 170.95 | 2,223,643 | 2,745,253 | 245,451 | 29.39              |
| JBW | 90.0 | 90.0 | 191.43 | 2,920,772 | 3,031,674 | 805,259 | 38.09              |
| LEV | 90.0 | 91.4 | 207.65 | 2,598,334 | 3,261,798 | 363,971 | 35.08              |
| LOS | 90.2 | 91.0 | 261.26 | 2,577,308 | 3,810,488 | 169,893 | 36.96              |
| LTA | 90.0 | 77.7 | 235.30 | 3,307,726 | 3,797,283 | 262,293 | 41.53 <sup>*</sup> |
| LTF | 90.1 | 90.0 | 174.11 | 2,203,716 | 2,785,270 | 259,770 | 29.59              |
| MAR | 86.5 | 36.9 | 420.94 | 3,390,072 | 5,548,828 | 410,747 | 52.70 <sup>*</sup> |
| MEL | 90.0 | 90.0 | 215.54 | 2,316,525 | 3,304,784 | 203,122 | 32.83              |
| MFI | 93.2 | 92.0 | 214.06 | 2,410,319 | 3,199,028 | 335,086 | 33.51              |
| MON | 90.0 | 90.0 | 202.76 | 2,316,525 | 3,304,784 | 203,122 | 34.34              |
| MOR | 98.8 | 90.2 | 276.71 | 2,266,299 | 3,988,288 | 104,644 | 35.85              |
| MOZ | 90.1 | 92.6 | 181.21 | 2,376,336 | 2,835,194 | 435,689 | 31.83              |
| MSO | 88.0 | 81.3 | 207.91 | 2,289,997 | 3,176,511 | 251,469 | 32.23 <sup>*</sup> |
| MTN | 85.7 | 73.7 | 226.27 | 2,615,471 | 3,335,086 | 565,398 | 36.73 <sup>*</sup> |
| MVY | 95.3 | 96.6 | 156.07 | 1,965,583 | 2,431,483 | 346,991 | 26.74              |
| NAB | 94.0 | 91.2 | 161.42 | 1,924,667 | 2,566,704 | 123,025 | 26.01              |
| NON | 89.9 | 79.5 | 224.58 | 2,253,893 | 3,285,762 | 257,332 | 32.68 <sup>*</sup> |
| OFF | 90.2 | 90.3 | 173.27 | 2,209,004 | 2,761,833 | 237,551 | 29.36              |
| RRO | 90.2 | 90.0 | 154.06 | 2,278,216 | 2,516,574 | 470,999 | 29.68              |
| RWR | 90.1 | 90.4 | 168.41 | 2,181,757 | 2,758,220 | 229,884 | 29.14              |
| RWY | 86.4 | 82.2 | 248.21 | 4,725,418 | 4,610,099 | 581,216 | 55.90 <sup>*</sup> |
| SAO | 69.9 | 70.4 | 192.04 | 2,625,293 | 2,884,852 | 730,621 | 35.18 <sup>*</sup> |
| SGT | 89.9 | 48.7 | 353.21 | 3,146,377 | 4,813,174 | 210,250 | 46.05 <sup>*</sup> |
| SIV | 90.0 | 90.0 | 191.30 | 2,397,156 | 3,098,296 | 277,978 | 32.54              |
| SOD | 71.3 | 63.8 | 298.30 | 2,816,703 | 4,236,908 | 472,748 | 42.42 <sup>*</sup> |
| TOL | 57.3 | 74.6 | 182.09 | 3,143,793 | 3,106,329 | 533,459 | 38.24 <sup>*</sup> |
| TON | 90.8 | 90.4 | 159.32 | 2,227,743 | 2,574,352 | 329,495 | 28.93              |
| VNI | 90.1 | 90.6 | 167.60 | 2,087,030 | 2,685,697 | 213,899 | 28.11              |
| WEI | 90.0 | 90.0 | 146.95 | 2,083,016 | 2,349,450 | 408,643 | 27.29              |
| ZON | 90.0 | 90.0 | 211.08 | 2,387,004 | 3,274,738 | 209,359 | 33.09              |
| 13X | 91.5 | 91.5 | 206.30 | 2,211,417 | 3,169,525 | 265,974 | 31.83              |

Table S3: Optimal conditions for the 4-step adsorption process for CO<sub>2</sub> capture using different zeolites. The feed is considered to be 1 kmol/s mixture of 14% CO<sub>2</sub> and 86% N<sub>2</sub>. The pressurization time is fixed to be 20 s.

| Zeolite | Number<br>of columns | Column<br>Length<br>(m) | Adsorption step   |                 | Blowdown step     |                 | Evacuation step   |                 |
|---------|----------------------|-------------------------|-------------------|-----------------|-------------------|-----------------|-------------------|-----------------|
|         |                      |                         | pressure<br>(bar) | duration<br>(s) | pressure<br>(bar) | duration<br>(s) | pressure<br>(bar) | duration<br>(s) |
| ABW     | 2                    | 1.00                    | 2.34              | 31.88           | 0.48              | 50.77           | 0.02              | 69.97           |
| AFG     | 2                    | 1.00                    | 2.58              | 25.80           | 0.26              | 61.18           | 0.01              | 78.05           |
| AFN     | 2                    | 1.00                    | 2.04              | 20.00           | 0.24              | 24.66           | 0.01              | 45.49           |
| AFX     | 2                    | 1.00                    | 1.91              | 20.00           | 0.19              | 32.20           | 0.01              | 70.11           |
| AHT     | 2                    | 1.00                    | 2.01              | 33.73           | 0.65              | 49.26           | 0.03              | 74.45           |
| ANA     | 2                    | 4.82                    | 1.01              | 37.26           | 0.89              | 67.05           | 0.26              | 90.14           |
| AST     | 2                    | 1.00                    | 2.79              | 20.00           | 0.61              | 38.49           | 0.01              | 75.27           |
| ATN     | 2                    | 1.00                    | 1.00              | 36.79           | 0.10              | 100.00          | 0.01              | 100.00          |
| AWO     | 2                    | 1.00                    | 2.20              | 50.00           | 0.35              | 55.13           | 0.02              | 100.00          |
| BCT     | 1                    | 1.02                    | 1.05              | 21.75           | 0.37              | 28.21           | 0.01              | 70.01           |
| BIK     | 2                    | 1.00                    | 2.00              | 25.00           | 0.20              | 45.00           | 0.02              | 90.00           |
| CGF     | 2                    | 1.00                    | 2.84              | 26.18           | 0.44              | 70.23           | 0.01              | 89.98           |
| CHA     | 2                    | 1.00                    | 1.91              | 25.00           | 0.23              | 39.51           | 0.01              | 76.21           |
| DAC     | 2                    | 1.00                    | 1.00              | 50.00           | 0.12              | 67.71           | 0.01              | 100.00          |
| DFT     | 2                    | 1.00                    | 1.36              | 33.03           | 0.10              | 100.00          | 0.01              | 91.66           |
| EAB     | 2                    | 1.00                    | 1.00              | 20.00           | 0.12              | 90.69           | 0.01              | 94.74           |
| EON     | 2                    | 1.00                    | 2.86              | 26.72           | 0.36              | 73.06           | 0.01              | 100.00          |
| ERI     | 2                    | 1.00                    | 3.08              | 27.25           | 0.45              | 66.54           | 0.02              | 87.79           |
| FAR     | 1                    | 1.00                    | 3.49              | 20.00           | 0.45              | 34.09           | 0.01              | 100.00          |
| FAU     | 2                    | 2.62                    | 2.84              | 21.34           | 0.94              | 42.55           | 0.01              | 82.48           |
| FRA     | 1                    | 1.00                    | 1.25              | 20.00           | 0.10              | 20.00           | 0.01              | 100.00          |
| GIS     | 2                    | 1.00                    | 1.56              | 35.85           | 0.22              | 53.77           | 0.02              | 63.21           |
| GIU     | 2                    | 1.00                    | 1.74              | 21.06           | 0.20              | 45.00           | 0.01              | 79.09           |
| GOO     | 2                    | 1.00                    | 2.74              | 20.00           | 0.47              | 82.46           | 0.01              | 86.44           |
| IHW     | 2                    | 1.00                    | 3.67              | 20.00           | 0.48              | 61.86           | 0.02              | 75.45           |
| ITR     | 1                    | 1.00                    | 4.46              | 20.00           | 0.62              | 20.00           | 0.01              | 100.00          |
| ITW     | 2                    | 1.00                    | 2.80              | 30.22           | 0.32              | 72.66           | 0.03              | 98.63           |

|     |   |      |      |       |      |        |      |        |
|-----|---|------|------|-------|------|--------|------|--------|
| JBW | 2 | 1.00 | 1.00 | 28.99 | 0.11 | 100.00 | 0.01 | 100.00 |
| LEV | 2 | 1.00 | 2.23 | 20.00 | 0.29 | 58.46  | 0.01 | 74.67  |
| LOS | 2 | 1.00 | 3.04 | 22.25 | 0.25 | 20.00  | 0.01 | 60.31  |
| LTA | 1 | 1.00 | 2.54 | 20.00 | 0.30 | 20.00  | 0.01 | 82.11  |
| LTF | 2 | 1.00 | 2.82 | 29.76 | 0.47 | 82.75  | 0.02 | 100.00 |
| MAR | 1 | 1.00 | 1.58 | 20.00 | 0.10 | 20.00  | 0.01 | 78.44  |
| MEL | 2 | 1.00 | 3.53 | 23.42 | 0.47 | 59.49  | 0.01 | 76.19  |
| MFI | 2 | 1.00 | 2.00 | 25.00 | 0.20 | 45.00  | 0.01 | 88.69  |
| MON | 2 | 1.42 | 8.47 | 40.14 | 0.75 | 43.26  | 0.04 | 81.73  |
| MOR | 2 | 1.04 | 5.66 | 34.68 | 0.28 | 59.50  | 0.01 | 95.97  |
| MOZ | 2 | 1.00 | 1.67 | 28.73 | 0.29 | 74.22  | 0.01 | 100.00 |
| MSO | 2 | 1.00 | 3.11 | 20.00 | 0.49 | 59.70  | 0.01 | 67.12  |
| MTN | 2 | 1.00 | 1.99 | 20.00 | 0.29 | 100.00 | 0.01 | 100.00 |
| MVY | 2 | 1.03 | 1.94 | 23.66 | 0.38 | 39.43  | 0.01 | 82.20  |
| NAB | 2 | 1.08 | 5.86 | 20.26 | 0.61 | 35.83  | 0.05 | 68.59  |
| NON | 2 | 1.00 | 2.93 | 20.00 | 0.38 | 47.45  | 0.01 | 73.38  |
| OFF | 2 | 1.00 | 2.91 | 30.16 | 0.36 | 72.20  | 0.03 | 100.00 |
| RRO | 2 | 1.00 | 1.00 | 45.38 | 0.25 | 71.59  | 0.01 | 90.99  |
| RWR | 2 | 1.00 | 1.41 | 50.00 | 0.29 | 38.88  | 0.01 | 63.97  |
| RWY | 1 | 1.35 | 1.00 | 35.25 | 0.10 | 23.87  | 0.01 | 82.75  |
| SAO | 2 | 1.00 | 1.54 | 20.00 | 0.41 | 100.00 | 0.01 | 100.00 |
| SGT | 1 | 1.00 | 3.48 | 20.00 | 0.22 | 20.00  | 0.01 | 96.07  |
| SIV | 2 | 1.00 | 2.00 | 44.63 | 0.26 | 100.00 | 0.01 | 100.00 |
| SOD | 2 | 1.00 | 2.38 | 20.00 | 0.33 | 100.00 | 0.01 | 100.00 |
| TOL | 1 | 1.00 | 1.23 | 20.00 | 0.48 | 20.00  | 0.01 | 79.96  |
| TON | 2 | 1.00 | 2.92 | 20.00 | 0.39 | 72.43  | 0.03 | 92.80  |
| VNI | 2 | 1.00 | 3.32 | 24.79 | 0.59 | 63.06  | 0.02 | 79.91  |
| WEI | 2 | 1.03 | 1.91 | 20.47 | 0.39 | 43.32  | 0.01 | 80.74  |
| ZON | 2 | 1.00 | 3.66 | 24.49 | 0.39 | 68.00  | 0.02 | 87.65  |
| 13X | 2 | 1.04 | 2.88 | 30.50 | 0.52 | 89.09  | 0.01 | 100.00 |

---



# Zeolites for CO<sub>2</sub> capture

## ABW

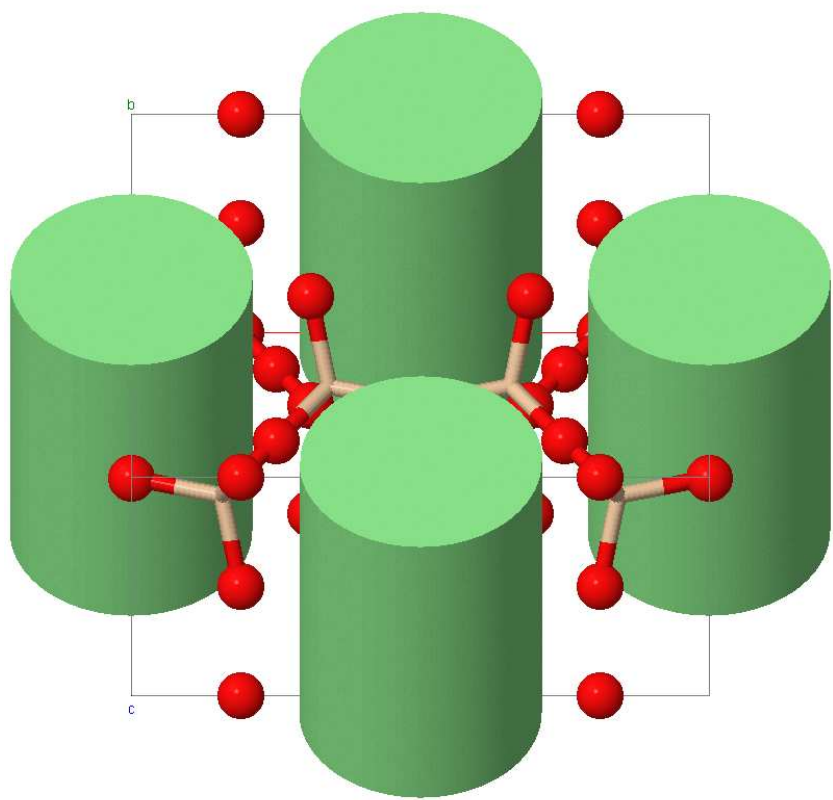

Figure S1: Main pore system of ABW from ZEOMICS. A unit cell is displayed where channels are green, cages are blue, and oxygen atoms of the zeolite structure are red.

Table S4: Physical properties for ABW.

| Property                            | Value |
|-------------------------------------|-------|
| Pore limiting diameter, PLD [Å]     | 4.1   |
| Largest cavity diameter, LCD [Å]    | 4.1   |
| Solid density [kg m <sup>-3</sup> ] | 1755  |

Table S5: Adsorption and geometric properties for ABW.

| Property                                                  | CO <sub>2</sub> | N <sub>2</sub> |
|-----------------------------------------------------------|-----------------|----------------|
| Henry constant [mol kg <sup>-1</sup> kPa <sup>-1</sup> ]  | 0.01490         | 0.00057        |
| Heat of adsorption at 298 K [kJ mol <sup>-1</sup> ]       | 32.5            | 15.3           |
| Accessible volume [cm <sup>3</sup> g <sup>-1</sup> ]      | 0.204           | 0.338          |
| Accessible surface area [m <sup>2</sup> g <sup>-1</sup> ] | 1324            | 3074           |

Table S6: Performance metrics for ABW.

| Property                                                          | Value  |
|-------------------------------------------------------------------|--------|
| Shape selectivity                                                 | –      |
| Size selectivity                                                  | 0.40   |
| Adsorption selectivity                                            | 26.25  |
| Minimum parasitic energy [kJ/kg CO <sub>2</sub> ]                 | 915.51 |
| Purity [%] at minimum parasitic energy                            | 88.41  |
| Cost [\$ /ton of CO <sub>2</sub> captured and compressed]         | 26.84  |
| Purity [%] at optimum cost                                        | 90.00  |
| Recovery [%] at optimum cost                                      | 91.71  |
| Energy penalty [kWh/ton CO <sub>2</sub> captured] at optimum cost | 151.73 |

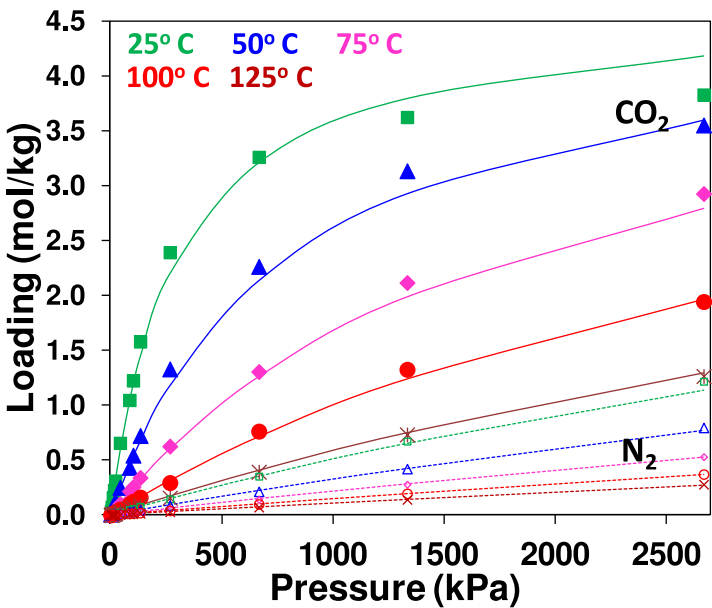

Figure S2: Adsorption isotherms of ABW. Symbols represent GCMC data, and lines represent predictions using the fitted dual-site Langmuir model (solid lines are for CO<sub>2</sub> and dashed lines are for N<sub>2</sub>).

Table S7: Dual-site Langmuir isotherm parameters for ABW.

| Parameter                                 | CO <sub>2</sub>       | N <sub>2</sub>        |
|-------------------------------------------|-----------------------|-----------------------|
| <u>Site 1</u>                             |                       |                       |
| $q^{sat}$ [mol kg <sup>-1</sup> ]         | 4.59                  | 2.57                  |
| $b^o$ [m <sup>3</sup> mol <sup>-1</sup> ] | $9.00 \times 10^{-8}$ | 0                     |
| $\Delta U$ [kJ mol <sup>-1</sup> ]        | 28.49                 | 7.21                  |
| <u>Site 2</u>                             |                       |                       |
| $q^{sat}$ [mol kg <sup>-1</sup> ]         | 4.59                  | 4.59                  |
| $b^o$ [m <sup>3</sup> mol <sup>-1</sup> ] | $9.00 \times 10^{-6}$ | $1.00 \times 10^{-6}$ |
| $\Delta U$ [kJ mol <sup>-1</sup> ]        | 0                     | 13.48                 |

AFG

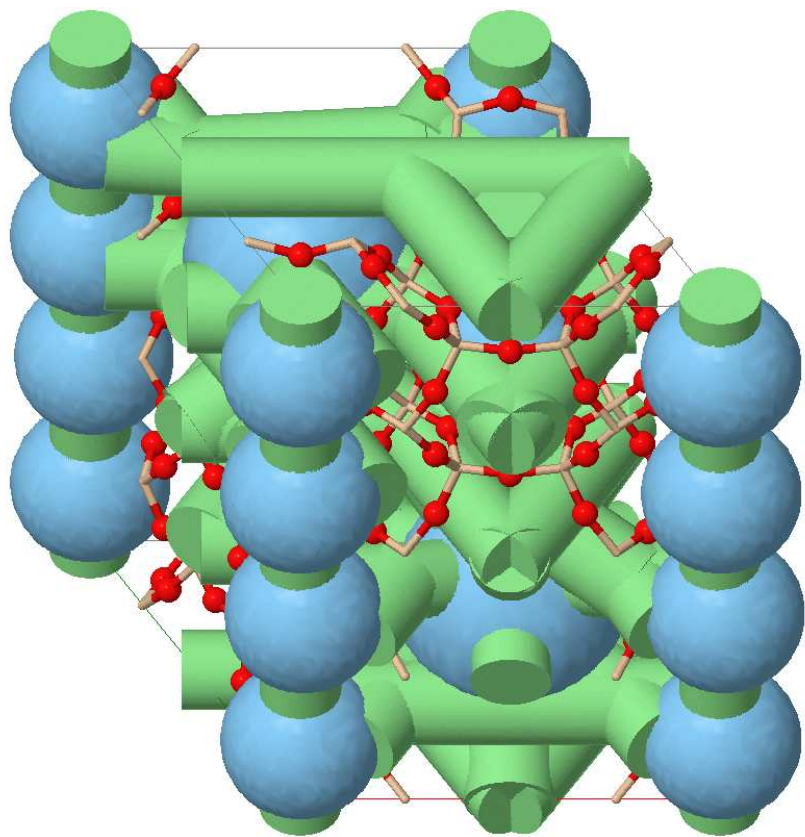

Figure S3: Main pore system of AFG from ZEOMICS. A unit cell is displayed where channels are green, cages are blue, and oxygen atoms of the zeolite structure are red.

Table S8: Physical properties for AFG.

| Property                            | Value |
|-------------------------------------|-------|
| Pore limiting diameter, PLD [Å]     | 2.7   |
| Largest cavity diameter, LCD [Å]    | 7.0   |
| Solid density [kg m <sup>-3</sup> ] | 1689  |

Table S9: Adsorption and geometric properties for AFG.

| Property                                                  | CO <sub>2</sub> | N <sub>2</sub> |
|-----------------------------------------------------------|-----------------|----------------|
| Henry constant [mol kg <sup>-1</sup> kPa <sup>-1</sup> ]  | 0.02154         | 0.00098        |
| Heat of adsorption at 298 K [kJ mol <sup>-1</sup> ]       | 27.8            | 14.6           |
| Accessible volume [cm <sup>3</sup> g <sup>-1</sup> ]      | –               | –              |
| Accessible surface area [m <sup>2</sup> g <sup>-1</sup> ] | –               | –              |

Table S10: Performance metrics for AFG.

| Property                                                          | Value  |
|-------------------------------------------------------------------|--------|
| Shape selectivity                                                 | 0.31   |
| Size selectivity                                                  | –      |
| Adsorption selectivity                                            | 22.00  |
| Minimum parasitic energy [kJ/kg CO <sub>2</sub> ]                 | –      |
| Purity [%] at minimum parasitic energy                            | –      |
| Cost [\$/ton of CO <sub>2</sub> captured and compressed]          | 35.91  |
| Purity [%] at optimum cost                                        | 90.21  |
| Recovery [%] at optimum cost                                      | 90.69  |
| Energy penalty [kWh/ton CO <sub>2</sub> captured] at optimum cost | 234.87 |

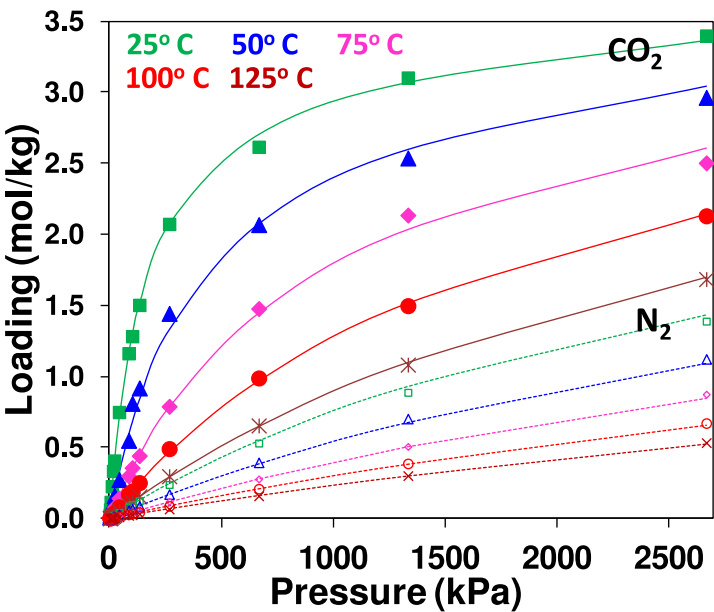

Figure S4: Adsorption isotherms of AFG. Symbols represent GCMC data, and lines represent predictions using the fitted dual-site Langmuir model (solid lines are for CO<sub>2</sub> and dashed lines are for N<sub>2</sub>).

Table S11: Dual-site Langmuir isotherm parameters for AFG.

| Parameter                                 | CO <sub>2</sub>       | N <sub>2</sub>        |
|-------------------------------------------|-----------------------|-----------------------|
| <u>Site 1</u>                             |                       |                       |
| $q^{sat}$ [mol kg <sup>-1</sup> ]         | 4.08                  | 4.08                  |
| $b^o$ [m <sup>3</sup> mol <sup>-1</sup> ] | $1.79 \times 10^{-4}$ | $9.00 \times 10^{-6}$ |
| $\Delta U$ [kJ mol <sup>-1</sup> ]        | 0                     | 10.50                 |
| <u>Site 2</u>                             |                       |                       |
| $q^{sat}$ [mol kg <sup>-1</sup> ]         | 3.64                  | 0.04                  |
| $b^o$ [m <sup>3</sup> mol <sup>-1</sup> ] | $2.20 \times 10^{-7}$ | $3.00 \times 10^{-6}$ |
| $\Delta U$ [kJ mol <sup>-1</sup> ]        | 27.51                 | 16.93                 |

AFN

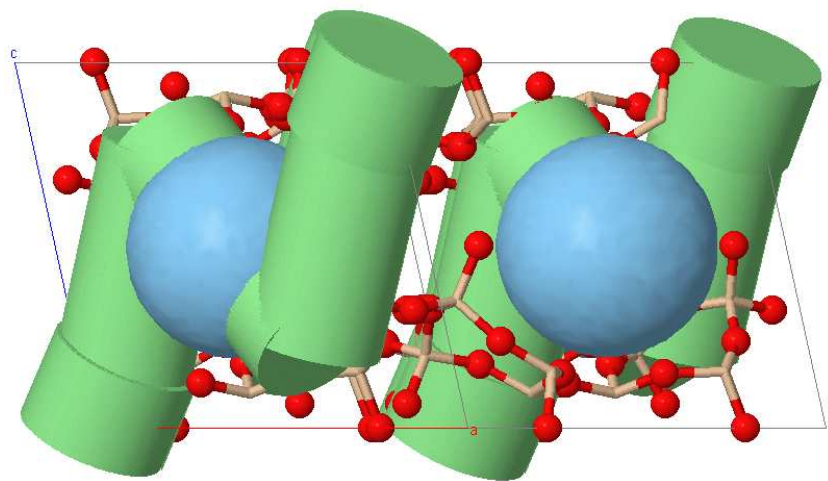

Figure S5: Main pore system of AFN from ZEOMICS. A unit cell is displayed where channels are green, cages are blue, and oxygen atoms of the zeolite structure are red.

Table S12: Physical properties for AFN.

| Property                            | Value |
|-------------------------------------|-------|
| Pore limiting diameter, PLD [Å]     | 3.7   |
| Largest cavity diameter, LCD [Å]    | 5.9   |
| Solid density [kg m <sup>-3</sup> ] | 1736  |

Table S13: Adsorption and geometric properties for AFN.

| Property                                                  | CO <sub>2</sub> | N <sub>2</sub> |
|-----------------------------------------------------------|-----------------|----------------|
| Henry constant [mol kg <sup>-1</sup> kPa <sup>-1</sup> ]  | 0.01702         | 0.00061        |
| Heat of adsorption at 298 K [kJ mol <sup>-1</sup> ]       | 27.3            | 15.0           |
| Accessible volume [cm <sup>3</sup> g <sup>-1</sup> ]      | 0.245           | 0.289          |
| Accessible surface area [m <sup>2</sup> g <sup>-1</sup> ] | 748             | 925            |

Table S14: Performance metrics for AFN.

| Property                                                          | Value   |
|-------------------------------------------------------------------|---------|
| Shape selectivity                                                 | –       |
| Size selectivity                                                  | 0.15    |
| Adsorption selectivity                                            | 27.68   |
| Minimum parasitic energy [kJ/kg CO <sub>2</sub> ]                 | 1123.68 |
| Purity [%] at minimum parasitic energy                            | 79.83   |
| Cost [\$ /ton of CO <sub>2</sub> captured and compressed]         | 32.78   |
| Purity [%] at optimum cost                                        | 90.15   |
| Recovery [%] at optimum cost                                      | 90.00   |
| Energy penalty [kWh/ton CO <sub>2</sub> captured] at optimum cost | 199.19  |

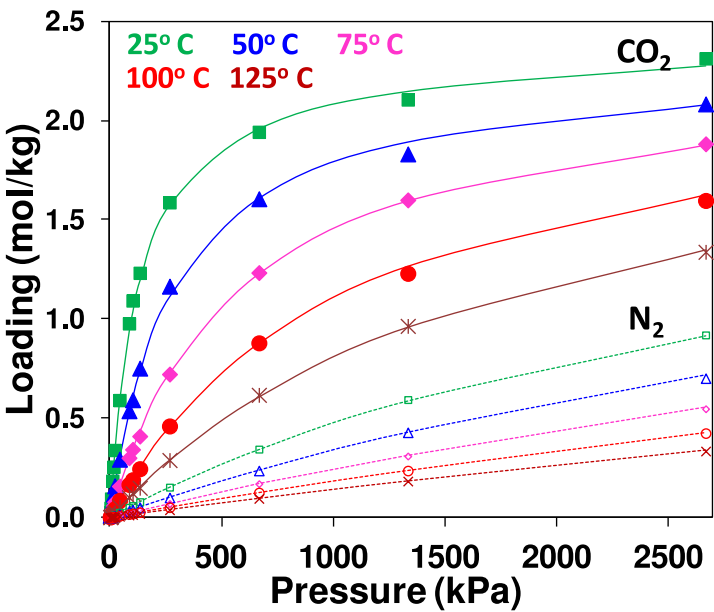

Figure S6: Adsorption isotherms of AFN. Symbols represent GCMC data, and lines represent predictions using the fitted dual-site Langmuir model (solid lines are for CO<sub>2</sub> and dashed lines are for N<sub>2</sub>).

Table S15: Dual-site Langmuir isotherm parameters for AFN.

| Parameter                                 | CO <sub>2</sub>       | N <sub>2</sub>        |
|-------------------------------------------|-----------------------|-----------------------|
| <u>Site 1</u>                             |                       |                       |
| $q^{sat}$ [mol kg <sup>-1</sup> ]         | 2.78                  | 2.27                  |
| $b^o$ [m <sup>3</sup> mol <sup>-1</sup> ] | 0                     | $8.00 \times 10^{-6}$ |
| $\Delta U$ [kJ mol <sup>-1</sup> ]        | 50.00                 | 11.06                 |
| <u>Site 2</u>                             |                       |                       |
| $q^{sat}$ [mol kg <sup>-1</sup> ]         | 2.27                  | 2.78                  |
| $b^o$ [m <sup>3</sup> mol <sup>-1</sup> ] | $1.00 \times 10^{-6}$ | 0                     |
| $\Delta U$ [kJ mol <sup>-1</sup> ]        | 23.82                 | 50.00                 |

AFX

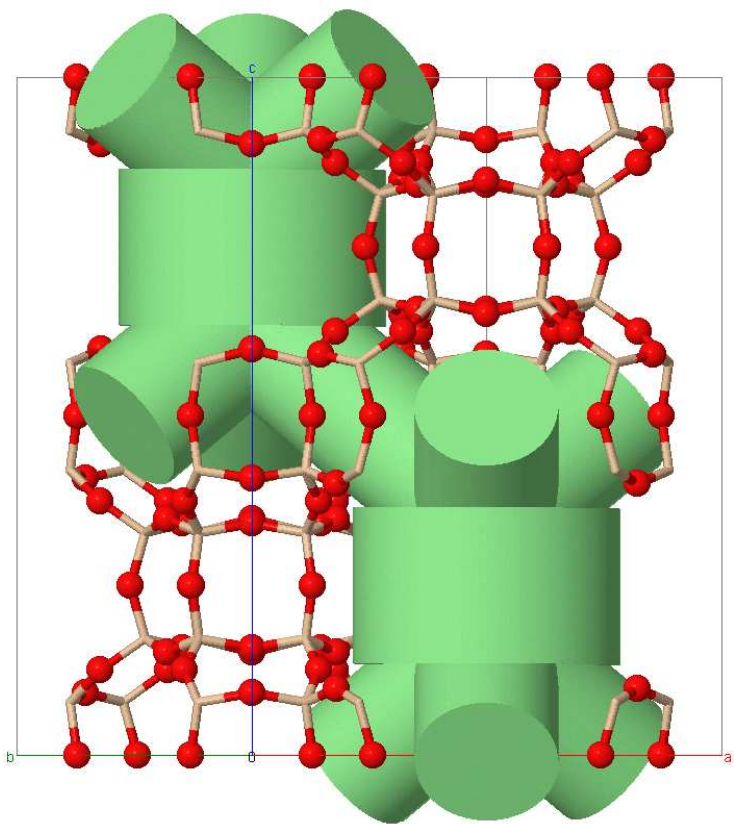

Figure S7: Main pore system of AFX from ZEOMICS. A unit cell is displayed where channels are green, cages are blue, and oxygen atoms of the zeolite structure are red.

Table S16: Physical properties for AFX.

| Property                            | Value |
|-------------------------------------|-------|
| Pore limiting diameter, PLD [Å]     | 4.1   |
| Largest cavity diameter, LCD [Å]    | 7.8   |
| Solid density [kg m <sup>-3</sup> ] | 1502  |

Table S17: Adsorption and geometric properties for AFX.

| Property                                                  | CO <sub>2</sub> | N <sub>2</sub> |
|-----------------------------------------------------------|-----------------|----------------|
| Henry constant [mol kg <sup>-1</sup> kPa <sup>-1</sup> ]  | 0.02607         | 0.00098        |
| Heat of adsorption at 298 K [kJ mol <sup>-1</sup> ]       | 27.0            | 11.8           |
| Accessible volume [cm <sup>3</sup> g <sup>-1</sup> ]      | 0.382           | 0.388          |
| Accessible surface area [m <sup>2</sup> g <sup>-1</sup> ] | 3326            | 4586           |

Table S18: Performance metrics for AFX.

| Property                                                          | Value   |
|-------------------------------------------------------------------|---------|
| Shape selectivity                                                 | –       |
| Size selectivity                                                  | 0.01    |
| Adsorption selectivity                                            | 26.52   |
| Minimum parasitic energy [kJ/kg CO <sub>2</sub> ]                 | 1207.60 |
| Purity [%] at minimum parasitic energy                            | 72.76   |
| Cost [\$ /ton of CO <sub>2</sub> captured and compressed]         | 34.22   |
| Purity [%] at optimum cost                                        | 90.00   |
| Recovery [%] at optimum cost                                      | 90.00   |
| Energy penalty [kWh/ton CO <sub>2</sub> captured] at optimum cost | 215.46  |

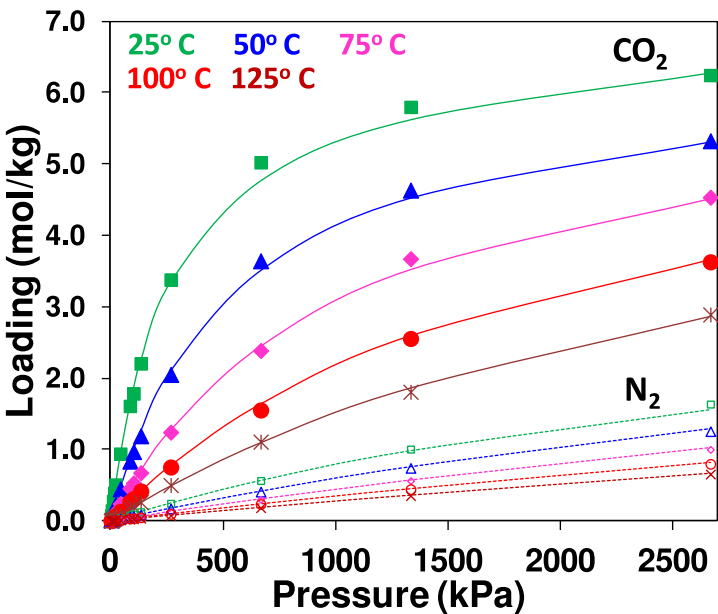

Figure S8: Adsorption isotherms of AFX. Symbols represent GCMC data, and lines represent predictions using the fitted dual-site Langmuir model (solid lines are for CO<sub>2</sub> and dashed lines are for N<sub>2</sub>).

Table S19: Dual-site Langmuir isotherm parameters for AFX.

| Parameter                                 | CO <sub>2</sub>       | N <sub>2</sub>        |
|-------------------------------------------|-----------------------|-----------------------|
| <u>Site 1</u>                             |                       |                       |
| $q^{sat}$ [mol kg <sup>-1</sup> ]         | 7.50                  | 4.68                  |
| $b^o$ [m <sup>3</sup> mol <sup>-1</sup> ] | 0                     | $1.20 \times 10^{-5}$ |
| $\Delta U$ [kJ mol <sup>-1</sup> ]        | 50.00                 | 9.33                  |
| <u>Site 2</u>                             |                       |                       |
| $q^{sat}$ [mol kg <sup>-1</sup> ]         | 6.19                  | 7.50                  |
| $b^o$ [m <sup>3</sup> mol <sup>-1</sup> ] | $1.00 \times 10^{-6}$ | 0                     |
| $\Delta U$ [kJ mol <sup>-1</sup> ]        | 22.41                 | 50.00                 |



AHT

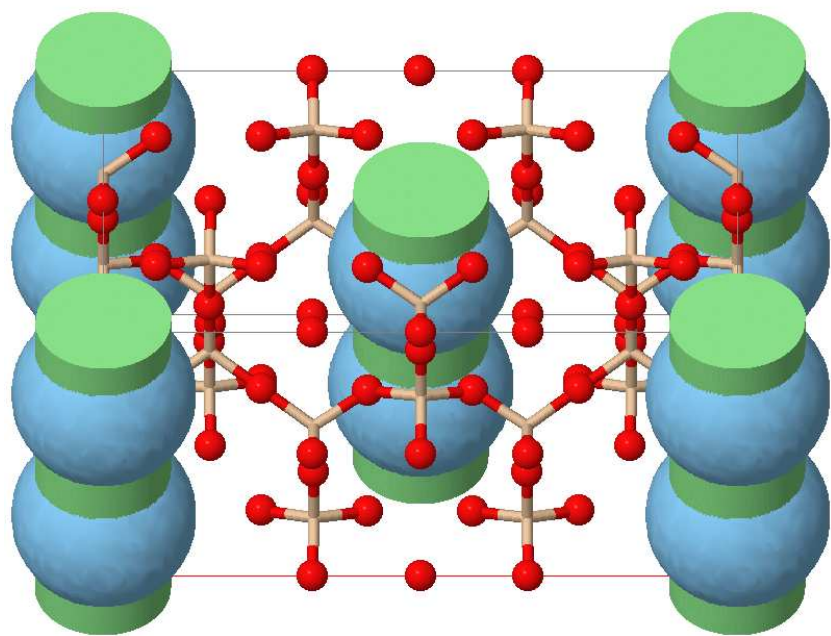

Figure S9: Main pore system of AHT from ZEOMICS. A unit cell is displayed where channels are green, cages are blue, and oxygen atoms of the zeolite structure are red.

Table S20: Physical properties for AHT.

| Property                            | Value |
|-------------------------------------|-------|
| Pore limiting diameter, PLD [Å]     | 3.4   |
| Largest cavity diameter, LCD [Å]    | 4.6   |
| Solid density [kg m <sup>-3</sup> ] | 1917  |

Table S21: Adsorption and geometric properties for AHT.

| Property                                                  | CO <sub>2</sub> | N <sub>2</sub> |
|-----------------------------------------------------------|-----------------|----------------|
| Henry constant [mol kg <sup>-1</sup> kPa <sup>-1</sup> ]  | 0.06093         | 0.00012        |
| Heat of adsorption at 298 K [kJ mol <sup>-1</sup> ]       | 37.0            | 14.0           |
| Accessible volume [cm <sup>3</sup> g <sup>-1</sup> ]      | –               | 0.214          |
| Accessible surface area [m <sup>2</sup> g <sup>-1</sup> ] | –               | 406            |

Table S22: Performance metrics for AHT.

| Property                                                          | Value  |
|-------------------------------------------------------------------|--------|
| Shape selectivity                                                 | 0.01   |
| Size selectivity                                                  | 1.00   |
| Adsorption selectivity                                            | 505.3  |
| Minimum parasitic energy [kJ/kg CO <sub>2</sub> ]                 | –      |
| Purity [%] at minimum parasitic energy                            | –      |
| Cost [\$ /ton of CO <sub>2</sub> captured and compressed]         | 23.63  |
| Purity [%] at optimum cost                                        | 90.00  |
| Recovery [%] at optimum cost                                      | 91.51  |
| Energy penalty [kWh/ton CO <sub>2</sub> captured] at optimum cost | 124.32 |

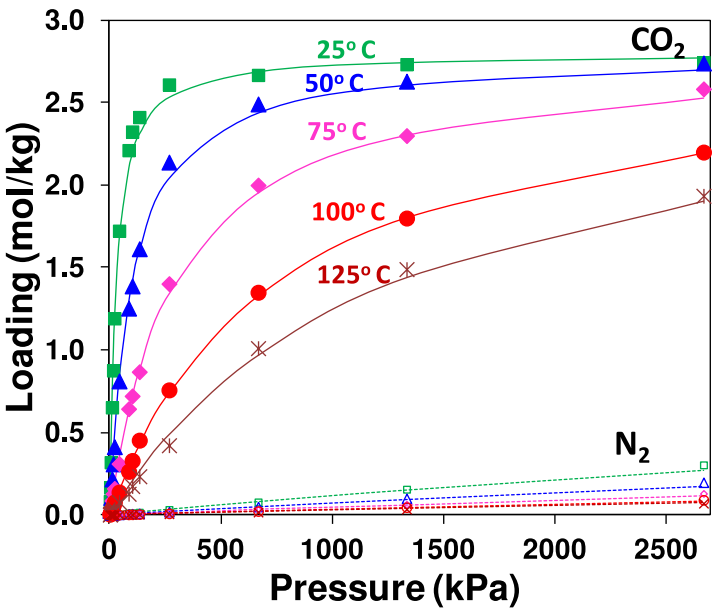

Figure S10: Adsorption isotherms of AHT. Symbols represent GCMC data, and lines represent predictions using the fitted dual-site Langmuir model (solid lines are for CO<sub>2</sub> and dashed lines are for N<sub>2</sub>).

Table S23: Dual-site Langmuir isotherm parameters for AHT.

| Parameter                                 | CO <sub>2</sub>       | N <sub>2</sub>        |
|-------------------------------------------|-----------------------|-----------------------|
| <u>Site 1</u>                             |                       |                       |
| $q^{sat}$ [mol kg <sup>-1</sup> ]         | 1.93                  | 3.29                  |
| $b^o$ [m <sup>3</sup> mol <sup>-1</sup> ] | 0                     | $6.30 \times 10^{-7}$ |
| $\Delta U$ [kJ mol <sup>-1</sup> ]        | 0                     | 12.30                 |
| <u>Site 2</u>                             |                       |                       |
| $q^{sat}$ [mol kg <sup>-1</sup> ]         | 3.29                  | 0                     |
| $b^o$ [m <sup>3</sup> mol <sup>-1</sup> ] | $6.00 \times 10^{-8}$ | 0                     |
| $\Delta U$ [kJ mol <sup>-1</sup> ]        | 33.79                 | 50.00                 |

ANA

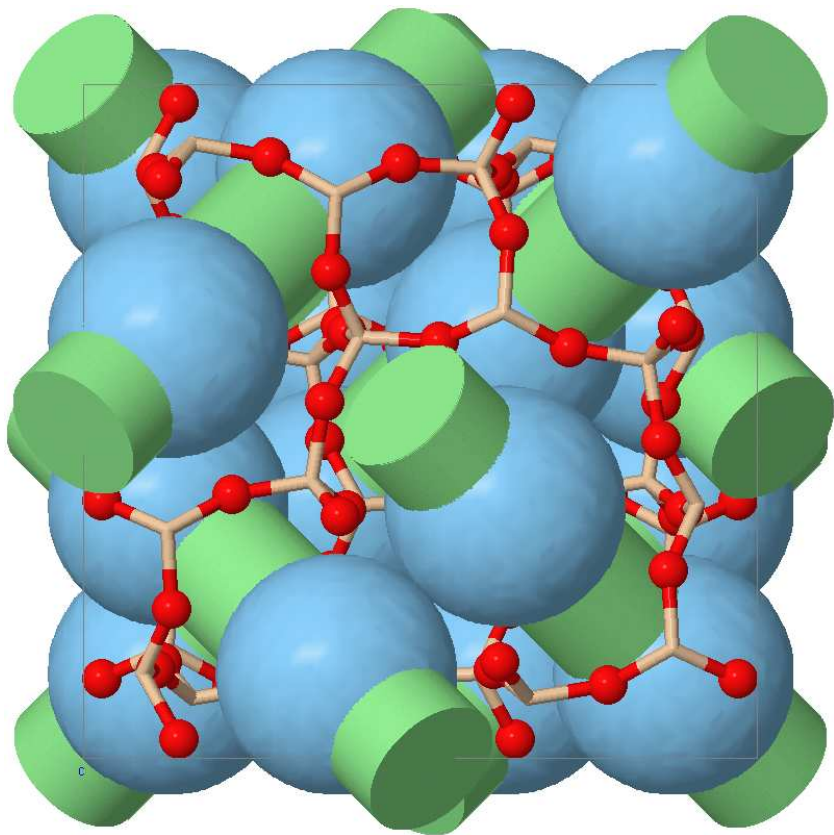

Figure S11: Main pore system of ANA from ZEOMICS. A unit cell is displayed where channels are green, cages are blue, and oxygen atoms of the zeolite structure are red.

Table S24: Physical properties for ANA.

| Property                            | Value |
|-------------------------------------|-------|
| Pore limiting diameter, PLD [Å]     | 3.0   |
| Largest cavity diameter, LCD [Å]    | 4.9   |
| Solid density [kg m <sup>-3</sup> ] | 1918  |

Table S25: Adsorption and geometric properties for ANA.

| Property                                                  | CO <sub>2</sub> | N <sub>2</sub> |
|-----------------------------------------------------------|-----------------|----------------|
| Henry constant [mol kg <sup>-1</sup> kPa <sup>-1</sup> ]  | 0.00011         | 0.00018        |
| Heat of adsorption at 298 K [kJ mol <sup>-1</sup> ]       | 30.7            | 18.7           |
| Accessible volume [cm <sup>3</sup> g <sup>-1</sup> ]      | –               | –              |
| Accessible surface area [m <sup>2</sup> g <sup>-1</sup> ] | –               | –              |

Table S26: Performance metrics for ANA.

| Property                                                          | Value   |
|-------------------------------------------------------------------|---------|
| Shape selectivity                                                 | 0.44    |
| Size selectivity                                                  | –       |
| Adsorption selectivity                                            | 0.63    |
| Minimum parasitic energy [kJ/kg CO <sub>2</sub> ]                 | –       |
| Purity [%] at minimum parasitic energy                            | –       |
| Cost [\$ /ton of CO <sub>2</sub> captured and compressed]         | 122.94  |
| Purity [%] at optimum cost                                        | 11.24   |
| Recovery [%] at optimum cost                                      | 2.49    |
| Energy penalty [kWh/ton CO <sub>2</sub> captured] at optimum cost | 1354.00 |

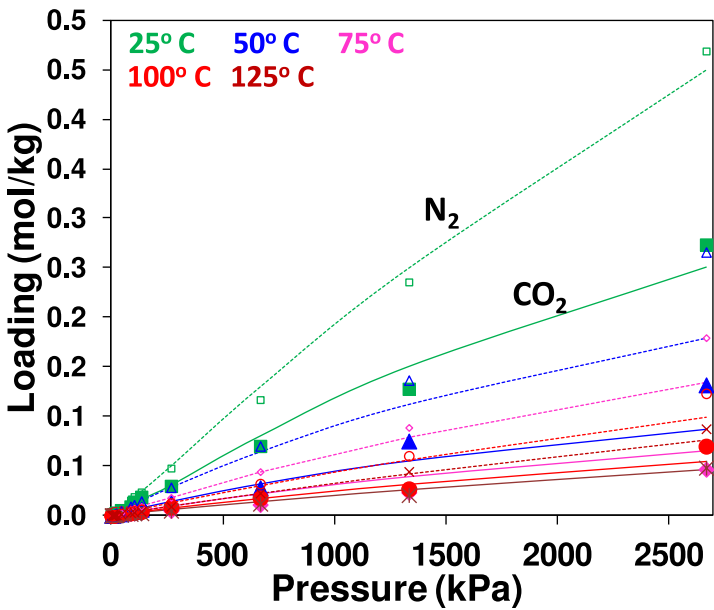

Figure S12: Adsorption isotherms of ANA. Symbols represent GCMC data, and lines represent predictions using the fitted dual-site Langmuir model (solid lines are for CO<sub>2</sub> and dashed lines are for N<sub>2</sub>).

Table S27: Dual-site Langmuir isotherm parameters for ANA.

| Parameter                                 | CO <sub>2</sub>       | N <sub>2</sub>        |
|-------------------------------------------|-----------------------|-----------------------|
| <u>Site 1</u>                             |                       |                       |
| $q^{sat}$ [mol kg <sup>-1</sup> ]         | 0.33                  | 0.33                  |
| $b^o$ [m <sup>3</sup> mol <sup>-1</sup> ] | 0                     | $1.00 \times 10^{-5}$ |
| $\Delta U$ [kJ mol <sup>-1</sup> ]        | 50.00                 | 10.45                 |
| <u>Site 2</u>                             |                       |                       |
| $q^{sat}$ [mol kg <sup>-1</sup> ]         | 0.33                  | 0.33                  |
| $b^o$ [m <sup>3</sup> mol <sup>-1</sup> ] | $3.10 \times 10^{-5}$ | $2.90 \times 10^{-7}$ |
| $\Delta U$ [kJ mol <sup>-1</sup> ]        | 6.46                  | 19.58                 |

AST

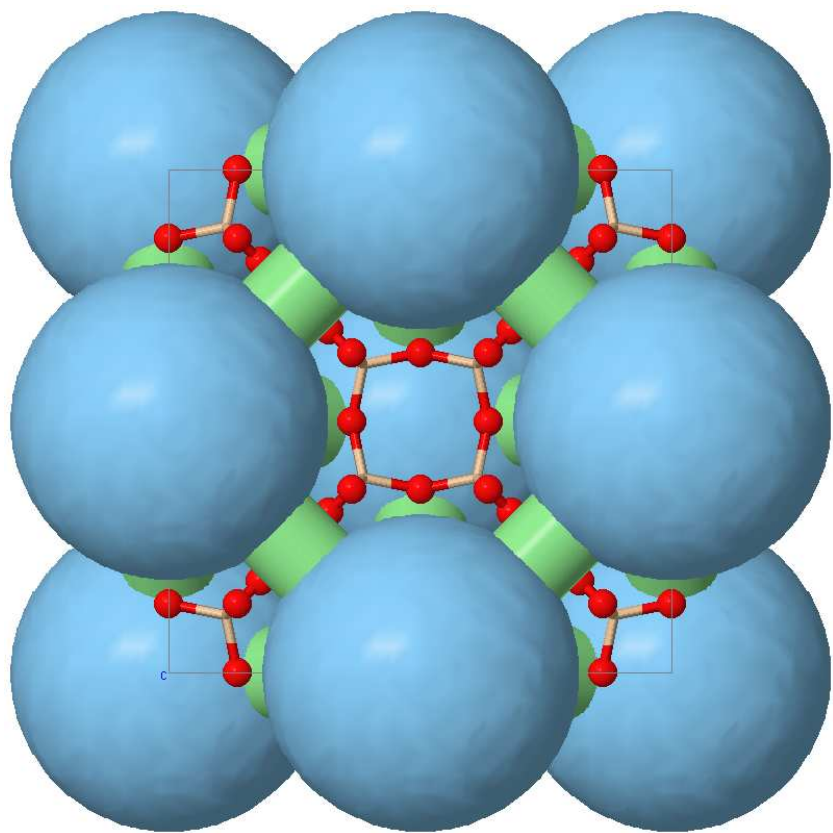

Figure S13: Main pore system of AST from ZEOMICS. A unit cell is displayed where channels are green, cages are blue, and oxygen atoms of the zeolite structure are red.

Table S28: Physical properties for AST.

| Property                            | Value |
|-------------------------------------|-------|
| Pore limiting diameter, PLD [Å]     | 2.5   |
| Largest cavity diameter, LCD [Å]    | 8.6   |
| Solid density [kg m <sup>-3</sup> ] | 1578  |

Table S29: Adsorption and geometric properties for AST.

| Property                                                  | CO <sub>2</sub> | N <sub>2</sub> |
|-----------------------------------------------------------|-----------------|----------------|
| Henry constant [mol kg <sup>-1</sup> kPa <sup>-1</sup> ]  | 0.00356         | 0.00081        |
| Heat of adsorption at 298 K [kJ mol <sup>-1</sup> ]       | 2.5             | 15.1           |
| Accessible volume [cm <sup>3</sup> g <sup>-1</sup> ]      | –               | –              |
| Accessible surface area [m <sup>2</sup> g <sup>-1</sup> ] | –               | –              |

Table S30: Performance metrics for AST.

| Property                                                          | Value  |
|-------------------------------------------------------------------|--------|
| Shape selectivity                                                 | 0.14   |
| Size selectivity                                                  | –      |
| Adsorption selectivity                                            | 4.39   |
| Minimum parasitic energy [kJ/kg CO <sub>2</sub> ]                 | –      |
| Purity [%] at minimum parasitic energy                            | –      |
| Cost [\$ /ton of CO <sub>2</sub> captured and compressed]         | 32.26  |
| Purity [%] at optimum cost                                        | 69.97  |
| Recovery [%] at optimum cost                                      | 72.46  |
| Energy penalty [kWh/ton CO <sub>2</sub> captured] at optimum cost | 223.75 |

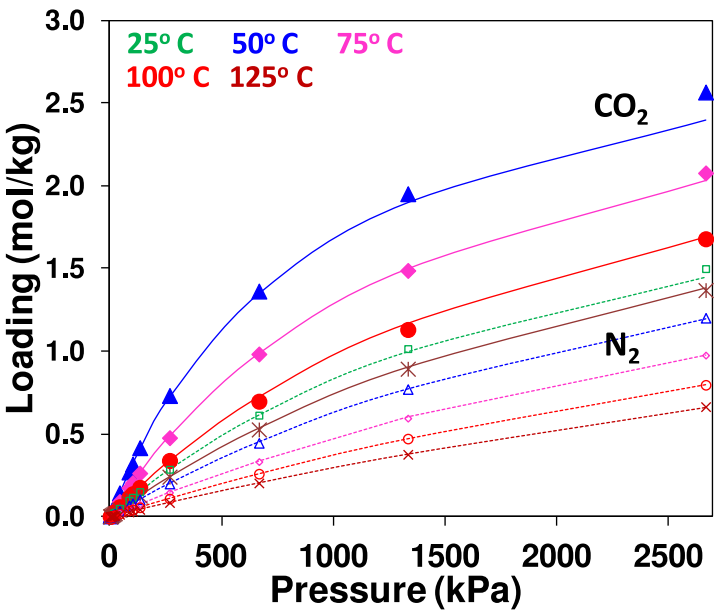

Figure S14: Adsorption isotherms of AST. Symbols represent GCMC data, and lines represent predictions using the fitted dual-site Langmuir model (solid lines are for CO<sub>2</sub> and dashed lines are for N<sub>2</sub>).

Table S31: Dual-site Langmuir isotherm parameters for AST.

| Parameter                                 | CO <sub>2</sub>       | N <sub>2</sub>        |
|-------------------------------------------|-----------------------|-----------------------|
| <u>Site 1</u>                             |                       |                       |
| $q^{sat}$ [mol kg <sup>-1</sup> ]         | 3.08                  | 3.08                  |
| $b^o$ [m <sup>3</sup> mol <sup>-1</sup> ] | $3.00 \times 10^{-6}$ | $1.80 \times 10^{-5}$ |
| $\Delta U$ [kJ mol <sup>-1</sup> ]        | 9.66                  | 9.92                  |
| <u>Site 2</u>                             |                       |                       |
| $q^{sat}$ [mol kg <sup>-1</sup> ]         | 3.08                  | 0.04                  |
| $b^o$ [m <sup>3</sup> mol <sup>-1</sup> ] | $9.00 \times 10^{-6}$ | $1.81 \times 10^{-4}$ |
| $\Delta U$ [kJ mol <sup>-1</sup> ]        | 15.58                 | 0                     |

ATN

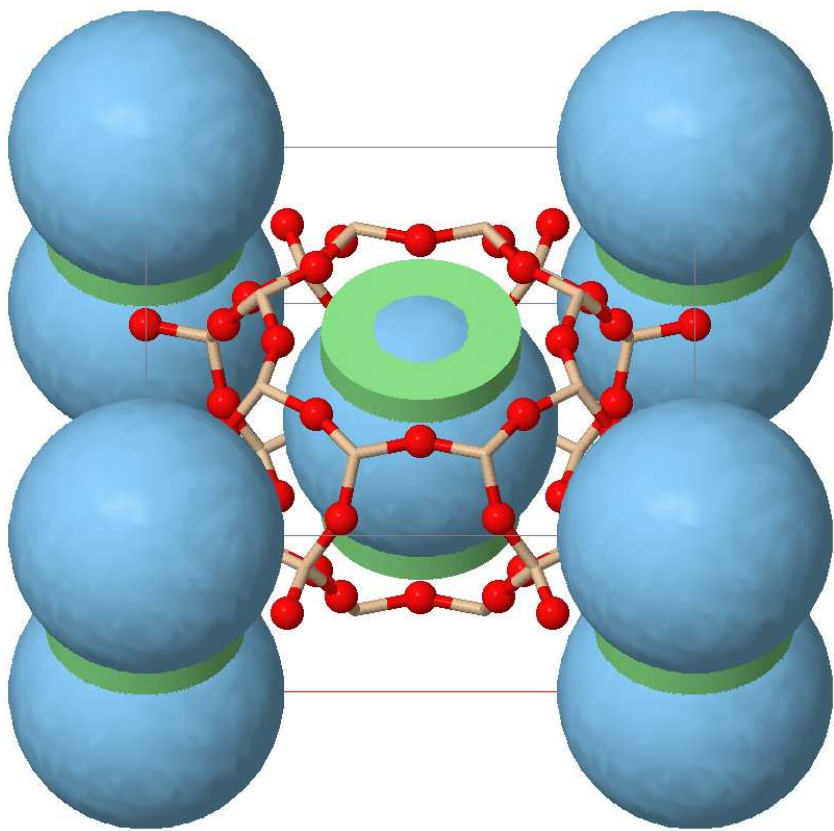

Figure S15: Main pore system of ATN from ZEOMICS. A unit cell is displayed where channels are green, cages are blue, and oxygen atoms of the zeolite structure are red.

Table S32: Physical properties for ATN.

| Property                            | Value |
|-------------------------------------|-------|
| Pore limiting diameter, PLD [Å]     | 4.7   |
| Largest cavity diameter, LCD [Å]    | 6.6   |
| Solid density [kg m <sup>-3</sup> ] | 1778  |

Table S33: Adsorption and geometric properties for ATN.

| Property                                                  | CO <sub>2</sub> | N <sub>2</sub> |
|-----------------------------------------------------------|-----------------|----------------|
| Henry constant [mol kg <sup>-1</sup> kPa <sup>-1</sup> ]  | 0.09238         | 0.00122        |
| Heat of adsorption at 298 K [kJ mol <sup>-1</sup> ]       | 35.9            | 15.9           |
| Accessible volume [cm <sup>3</sup> g <sup>-1</sup> ]      | 0.238           | 0.316          |
| Accessible surface area [m <sup>2</sup> g <sup>-1</sup> ] | 985             | 1602           |



Table S34: Performance metrics for ATN.

| Property                                                          | Value  |
|-------------------------------------------------------------------|--------|
| Shape selectivity                                                 | –      |
| Size selectivity                                                  | 0.25   |
| Adsorption selectivity                                            | 75.69  |
| Minimum parasitic energy [kJ/kg CO <sub>2</sub> ]                 | 853.40 |
| Purity [%] at minimum parasitic energy                            | 88.73  |
| Cost [\$ /ton of CO <sub>2</sub> captured and compressed]         | 38.13  |
| Purity [%] at optimum cost                                        | 89.52  |
| Recovery [%] at optimum cost                                      | 82.60  |
| Energy penalty [kWh/ton CO <sub>2</sub> captured] at optimum cost | 213.47 |

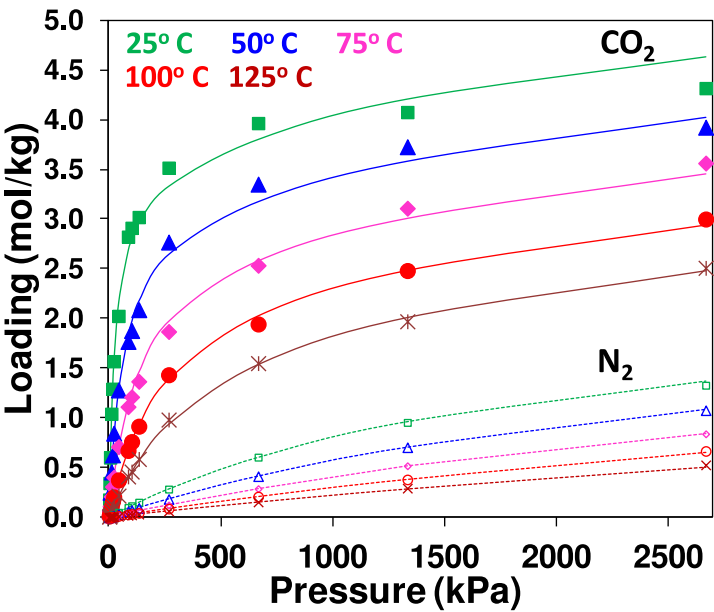

Figure S16: Adsorption isotherms of ATN. Symbols represent GCMC data, and lines represent predictions using the fitted dual-site Langmuir model (solid lines are for CO<sub>2</sub> and dashed lines are for N<sub>2</sub>).

Table S35: Dual-site Langmuir isotherm parameters for ATN.

| Parameter                                 | CO <sub>2</sub>       | N <sub>2</sub>        |
|-------------------------------------------|-----------------------|-----------------------|
| <u>Site 1</u>                             |                       |                       |
| $q^{sat}$ [mol kg <sup>-1</sup> ]         | 5.18                  | 4.30                  |
| $b^o$ [m <sup>3</sup> mol <sup>-1</sup> ] | $5.00 \times 10^{-6}$ | $4.00 \times 10^{-6}$ |
| $\Delta U$ [kJ mol <sup>-1</sup> ]        | 11.88                 | 12.87                 |
| <u>Site 2</u>                             |                       |                       |
| $q^{sat}$ [mol kg <sup>-1</sup> ]         | 5.18                  | 0                     |
| $b^o$ [m <sup>3</sup> mol <sup>-1</sup> ] | $5.30 \times 10^{-7}$ | $9.00 \times 10^{-6}$ |
| $\Delta U$ [kJ mol <sup>-1</sup> ]        | 29.02                 | 20.43                 |



AWO

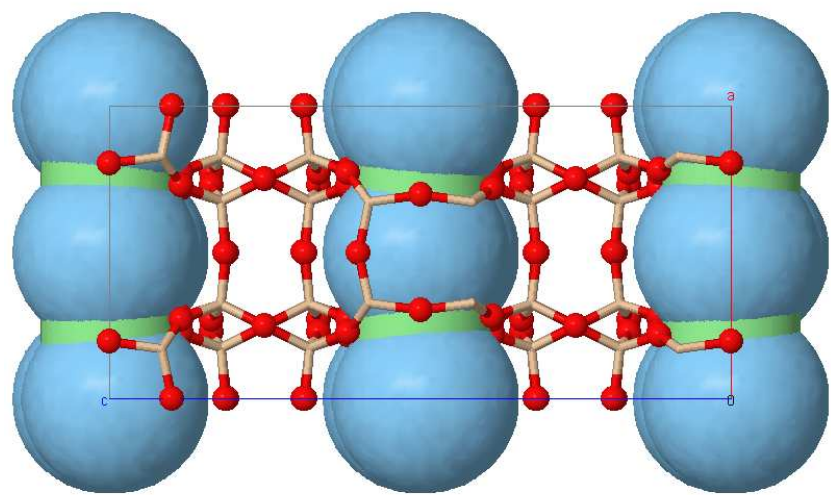

Figure S17: Main pore system of AWO from ZEOMICS. A unit cell is displayed where channels are green, cages are blue, and oxygen atoms of the zeolite structure are red.

Table S36: Physical properties for AWO.

| Property                            | Value |
|-------------------------------------|-------|
| Pore limiting diameter, PLD [Å]     | 4.3   |
| Largest cavity diameter, LCD [Å]    | 5.8   |
| Solid density [kg m <sup>-3</sup> ] | 1819  |

Table S37: Adsorption and geometric properties for AWO.

| Property                                                  | CO <sub>2</sub> | N <sub>2</sub> |
|-----------------------------------------------------------|-----------------|----------------|
| Henry constant [mol kg <sup>-1</sup> kPa <sup>-1</sup> ]  | 0.05281         | 0.00080        |
| Heat of adsorption at 298 K [kJ mol <sup>-1</sup> ]       | 32.4            | 17.4           |
| Accessible volume [cm <sup>3</sup> g <sup>-1</sup> ]      | 0.178           | 0.227          |
| Accessible surface area [m <sup>2</sup> g <sup>-1</sup> ] | 1150            | 1180           |

Table S38: Performance metrics for AWO.

| Property                                                          | Value  |
|-------------------------------------------------------------------|--------|
| Shape selectivity                                                 | –      |
| Size selectivity                                                  | 0.22   |
| Adsorption selectivity                                            | 65.87  |
| Minimum parasitic energy [kJ/kg CO <sub>2</sub> ]                 | 866.85 |
| Purity [%] at minimum parasitic energy                            | 88.78  |
| Cost [\$ /ton of CO <sub>2</sub> captured and compressed]         | 27.13  |
| Purity [%] at optimum cost                                        | 92.01  |
| Recovery [%] at optimum cost                                      | 90.81  |
| Energy penalty [kWh/ton CO <sub>2</sub> captured] at optimum cost | 164.27 |

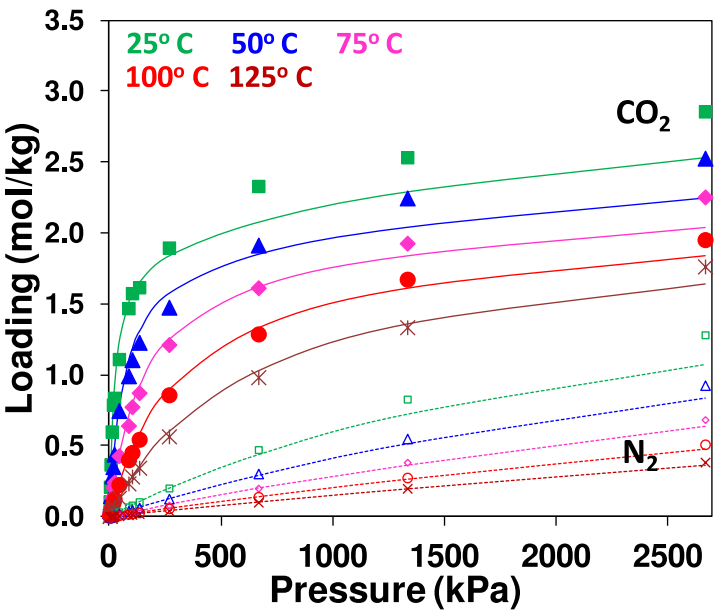

Figure S18: Adsorption isotherms of AWO. Symbols represent GCMC data, and lines represent predictions using the fitted dual-site Langmuir model (solid lines are for CO<sub>2</sub> and dashed lines are for N<sub>2</sub>).

Table S39: Dual-site Langmuir isotherm parameters for AWO.

| Parameter                                 | CO <sub>2</sub>       | N <sub>2</sub>        |
|-------------------------------------------|-----------------------|-----------------------|
| <u>Site 1</u>                             |                       |                       |
| $q^{sat}$ [mol kg <sup>-1</sup> ]         | 2.92                  | 2.76                  |
| $b^o$ [m <sup>3</sup> mol <sup>-1</sup> ] | $2.00 \times 10^{-6}$ | $2.00 \times 10^{-6}$ |
| $\Delta U$ [kJ mol <sup>-1</sup> ]        | 24.69                 | 15.20                 |
| <u>Site 2</u>                             |                       |                       |
| $q^{sat}$ [mol kg <sup>-1</sup> ]         | 3.43                  | 0                     |
| $b^o$ [m <sup>3</sup> mol <sup>-1</sup> ] | 0                     | 0                     |
| $\Delta U$ [kJ mol <sup>-1</sup> ]        | 28.90                 | 27.46                 |

BCT

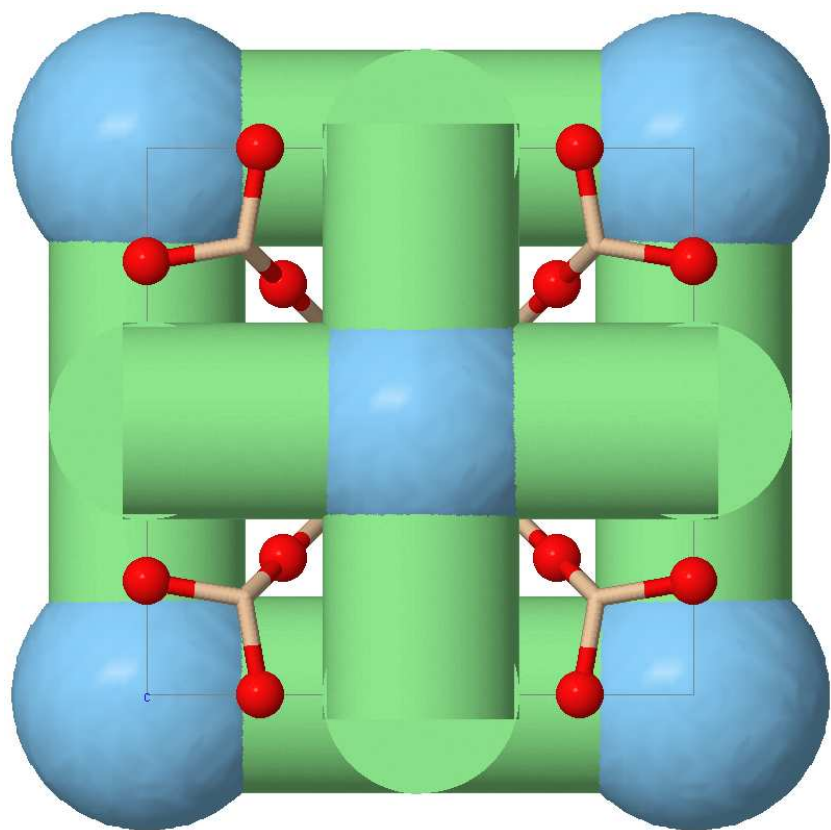

Figure S19: Main pore system of BCT from ZEOMICS. A unit cell is displayed where channels are green, cages are blue, and oxygen atoms of the zeolite structure are red.

Table S40: Physical properties for BCT.

| Property                            | Value |
|-------------------------------------|-------|
| Pore limiting diameter, PLD [Å]     | 3.2   |
| Largest cavity diameter, LCD [Å]    | 4.4   |
| Solid density [kg m <sup>-3</sup> ] | 1895  |

Table S41: Adsorption and geometric properties for BCT.

| Property                                                  | CO <sub>2</sub> | N <sub>2</sub> |
|-----------------------------------------------------------|-----------------|----------------|
| Henry constant [mol kg <sup>-1</sup> kPa <sup>-1</sup> ]  | 0.00001         | 0.00000        |
| Heat of adsorption at 298 K [kJ mol <sup>-1</sup> ]       | 2.5             | 2.5            |
| Accessible volume [cm <sup>3</sup> g <sup>-1</sup> ]      | –               | 0.320          |
| Accessible surface area [m <sup>2</sup> g <sup>-1</sup> ] | –               | 2711           |

Table S42: Performance metrics for BCT.

| Property                                                          | Value      |
|-------------------------------------------------------------------|------------|
| Shape selectivity                                                 | 0.14       |
| Size selectivity                                                  | 1.00       |
| Adsorption selectivity                                            | 12.00      |
| Minimum parasitic energy [kJ/kg CO <sub>2</sub> ]                 | 3984634.94 |
| Purity [%] at minimum parasitic energy                            | 51.26      |
| Cost [\$/ton of CO <sub>2</sub> captured and compressed]          | 64.20      |
| Purity [%] at optimum cost                                        | 0.15       |
| Recovery [%] at optimum cost                                      | 0.02       |
| Energy penalty [kWh/ton CO <sub>2</sub> captured] at optimum cost | 804.37     |

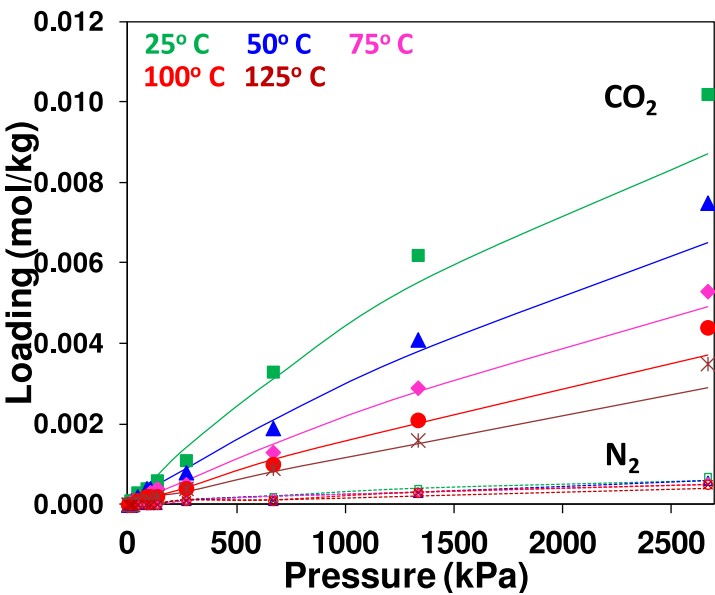

Figure S20: Adsorption isotherms of BCT. Symbols represent GCMC data, and lines represent predictions using the fitted dual-site Langmuir model (solid lines are for CO<sub>2</sub> and dashed lines are for N<sub>2</sub>).

Table S43: Dual-site Langmuir isotherm parameters for BCT.

| Parameter                                 | CO <sub>2</sub>       | N <sub>2</sub>        |
|-------------------------------------------|-----------------------|-----------------------|
| <u>Site 1</u>                             |                       |                       |
| $q^{sat}$ [mol kg <sup>-1</sup> ]         | 0.01                  | 0.01                  |
| $b^o$ [m <sup>3</sup> mol <sup>-1</sup> ] | $7.00 \times 10^{-6}$ | 0                     |
| $\Delta U$ [kJ mol <sup>-1</sup> ]        | 11.68                 | 13.21                 |
| <u>Site 2</u>                             |                       |                       |
| $q^{sat}$ [mol kg <sup>-1</sup> ]         | 0.01                  | 0.01                  |
| $b^o$ [m <sup>3</sup> mol <sup>-1</sup> ] | $3.00 \times 10^{-6}$ | $2.30 \times 10^{-5}$ |
| $\Delta U$ [kJ mol <sup>-1</sup> ]        | 11.67                 | 2.72                  |

BIK

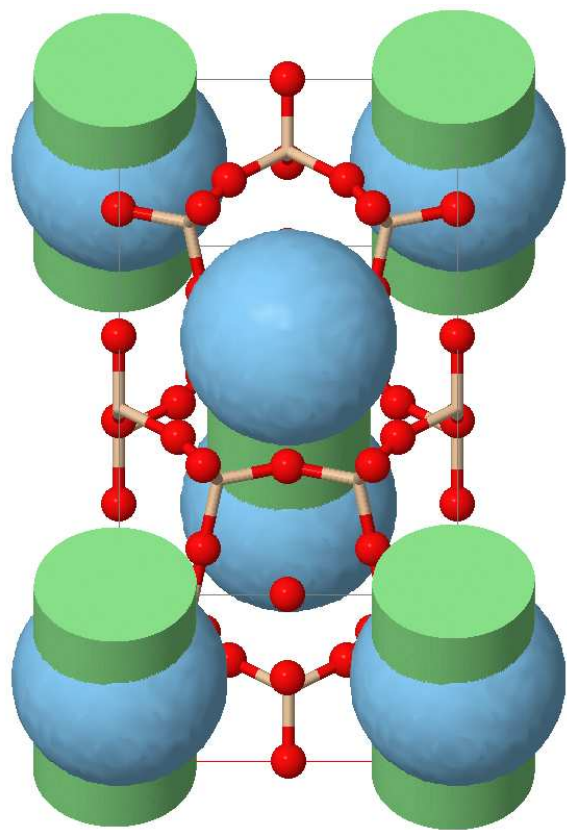

Figure S21: Main pore system of BIK from ZEOMICS. A unit cell is displayed where channels are green, cages are blue, and oxygen atoms of the zeolite structure are red.

Table S44: Physical properties for BIK.

| Property                            | Value |
|-------------------------------------|-------|
| Pore limiting diameter, PLD [Å]     | 3.6   |
| Largest cavity diameter, LCD [Å]    | 4.8   |
| Solid density [kg m <sup>-3</sup> ] | 1862  |

Table S45: Adsorption and geometric properties for BIK.

| Property                                                  | CO <sub>2</sub> | N <sub>2</sub> |
|-----------------------------------------------------------|-----------------|----------------|
| Henry constant [mol kg <sup>-1</sup> kPa <sup>-1</sup> ]  | 0.05365         | 0.00042        |
| Heat of adsorption at 298 K [kJ mol <sup>-1</sup> ]       | 34.1            | 16.5           |
| Accessible volume [cm <sup>3</sup> g <sup>-1</sup> ]      | 0.166           | 0.166          |
| Accessible surface area [m <sup>2</sup> g <sup>-1</sup> ] | 1043            | 1043           |

Table S46: Performance metrics for BIK.

| Property                                                          | Value  |
|-------------------------------------------------------------------|--------|
| Shape selectivity                                                 | –      |
| Size selectivity                                                  | –      |
| Adsorption selectivity                                            | 127.7  |
| Minimum parasitic energy [kJ/kg CO <sub>2</sub> ]                 | 899.44 |
| Purity [%] at minimum parasitic energy                            | 90.70  |
| Cost [\$ /ton of CO <sub>2</sub> captured and compressed]         | 28.29  |
| Purity [%] at optimum cost                                        | 93.79  |
| Recovery [%] at optimum cost                                      | 90.00  |
| Energy penalty [kWh/ton CO <sub>2</sub> captured] at optimum cost | 169.68 |

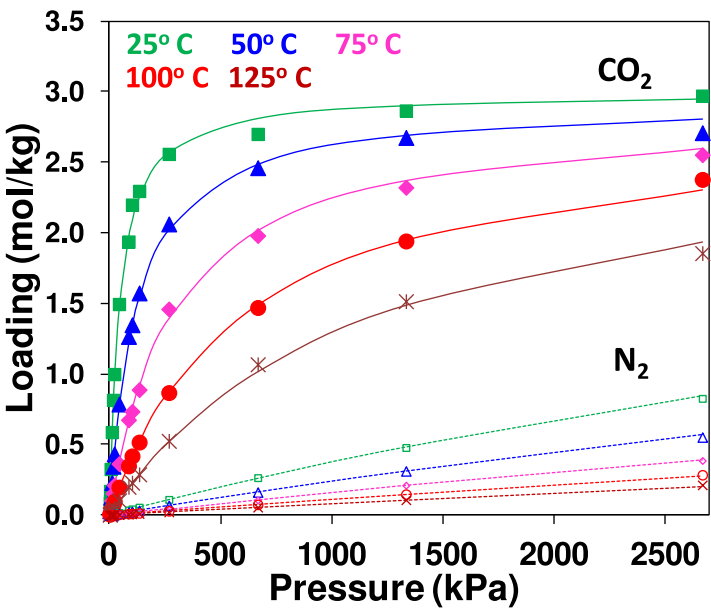

Figure S22: Adsorption isotherms of BIK. Symbols represent GCMC data, and lines represent predictions using the fitted dual-site Langmuir model (solid lines are for CO<sub>2</sub> and dashed lines are for N<sub>2</sub>).

Table S47: Dual-site Langmuir isotherm parameters for BIK.

| Parameter                                 | CO <sub>2</sub>       | N <sub>2</sub>        |
|-------------------------------------------|-----------------------|-----------------------|
| <u>Site 1</u>                             |                       |                       |
| $q^{sat}$ [mol kg <sup>-1</sup> ]         | 3.31                  | 3.47                  |
| $b^o$ [m <sup>3</sup> mol <sup>-1</sup> ] | 0                     | $1.00 \times 10^{-6}$ |
| $\Delta U$ [kJ mol <sup>-1</sup> ]        | 0                     | 13.43                 |
| <u>Site 2</u>                             |                       |                       |
| $q^{sat}$ [mol kg <sup>-1</sup> ]         | 3.57                  | 0                     |
| $b^o$ [m <sup>3</sup> mol <sup>-1</sup> ] | $2.60 \times 10^{-7}$ | $2.50 \times 10^{-7}$ |
| $\Delta U$ [kJ mol <sup>-1</sup> ]        | 30.03                 | 25.94                 |

CGF

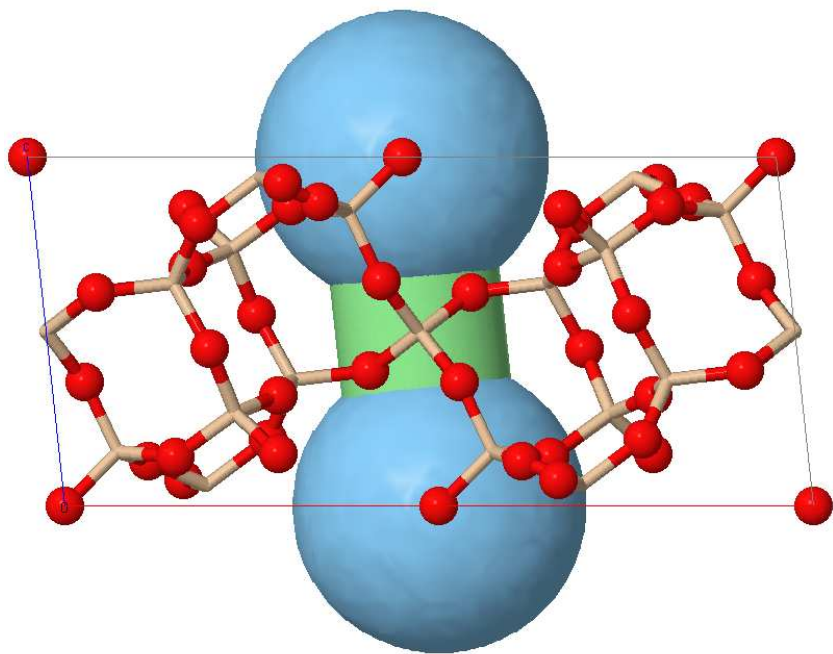

Figure S23: Main pore system of CGF from ZEOMICS. A unit cell is displayed where channels are green, cages are blue, and oxygen atoms of the zeolite structure are red.

Table S48: Physical properties for CGF.

| Property                            | Value |
|-------------------------------------|-------|
| Pore limiting diameter, PLD [Å]     | 3.5   |
| Largest cavity diameter, LCD [Å]    | 6.4   |
| Solid density [kg m <sup>-3</sup> ] | 1896  |

Table S49: Adsorption and geometric properties for CGF.

| Property                                                  | CO <sub>2</sub> | N <sub>2</sub> |
|-----------------------------------------------------------|-----------------|----------------|
| Henry constant [mol kg <sup>-1</sup> kPa <sup>-1</sup> ]  | 0.01311         | 0.00069        |
| Heat of adsorption at 298 K [kJ mol <sup>-1</sup> ]       | 26.7            | 15.6           |
| Accessible volume [cm <sup>3</sup> g <sup>-1</sup> ]      | 0.057           | 0.166          |
| Accessible surface area [m <sup>2</sup> g <sup>-1</sup> ] | 215             | 886            |

Table S50: Performance metrics for CGF.

| Property                                                          | Value   |
|-------------------------------------------------------------------|---------|
| Shape selectivity                                                 | –       |
| Size selectivity                                                  | 0.66    |
| Adsorption selectivity                                            | 18.88   |
| Minimum parasitic energy [kJ/kg CO <sub>2</sub> ]                 | 1372.73 |
| Purity [%] at minimum parasitic energy                            | 76.50   |
| Cost [\$ /ton of CO <sub>2</sub> captured and compressed]         | 32.82   |
| Purity [%] at optimum cost                                        | 90.05   |
| Recovery [%] at optimum cost                                      | 90.46   |
| Energy penalty [kWh/ton CO <sub>2</sub> captured] at optimum cost | 210.65  |

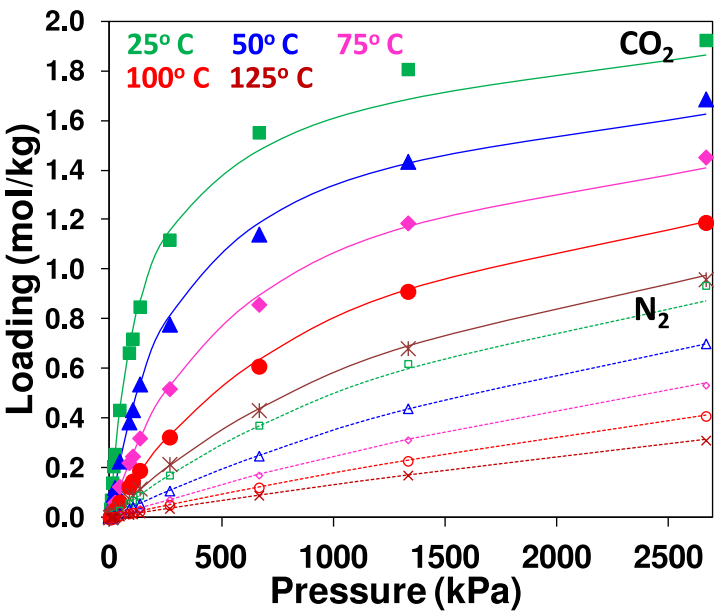

Figure S24: Adsorption isotherms of CGF. Symbols represent GCMC data, and lines represent predictions using the fitted dual-site Langmuir model (solid lines are for CO<sub>2</sub> and dashed lines are for N<sub>2</sub>).

Table S51: Dual-site Langmuir isotherm parameters for CGF.

| Parameter                                 | CO <sub>2</sub>       | N <sub>2</sub>        |
|-------------------------------------------|-----------------------|-----------------------|
| <u>Site 1</u>                             |                       |                       |
| $q^{sat}$ [mol kg <sup>-1</sup> ]         | 2.31                  | 2.31                  |
| $b^o$ [m <sup>3</sup> mol <sup>-1</sup> ] | $2.00 \times 10^{-8}$ | $4.00 \times 10^{-6}$ |
| $\Delta U$ [kJ mol <sup>-1</sup> ]        | 24.15                 | 13.21                 |
| <u>Site 2</u>                             |                       |                       |
| $q^{sat}$ [mol kg <sup>-1</sup> ]         | 1.54                  | 0.13                  |
| $b^o$ [m <sup>3</sup> mol <sup>-1</sup> ] | $1.00 \times 10^{-6}$ | 0                     |
| $\Delta U$ [kJ mol <sup>-1</sup> ]        | 24.06                 | 47.67                 |



CHA

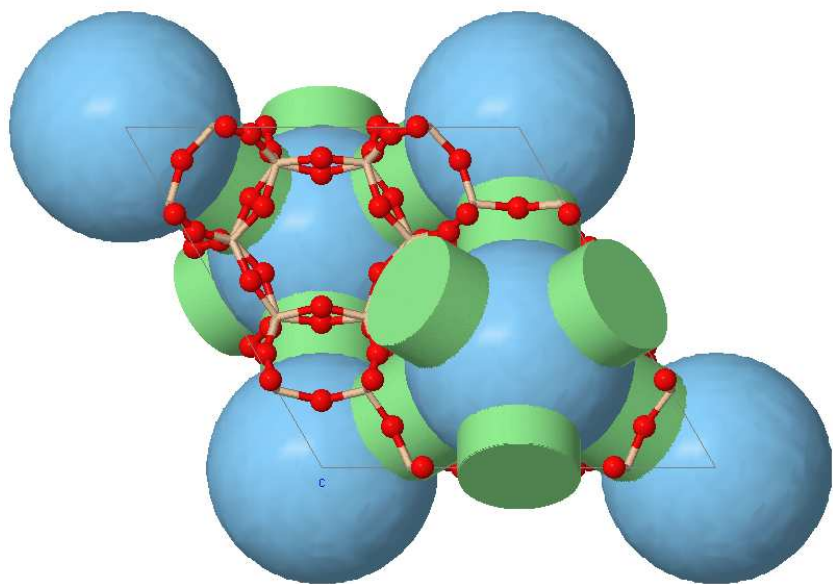

Figure S25: Main pore system of CHA from ZEOMICS. A unit cell is displayed where channels are green, cages are blue, and oxygen atoms of the zeolite structure are red.

Table S52: Physical properties for CHA.

| Property                            | Value |
|-------------------------------------|-------|
| Pore limiting diameter, PLD [Å]     | 4.2   |
| Largest cavity diameter, LCD [Å]    | 8.0   |
| Solid density [kg m <sup>-3</sup> ] | 1502  |

Table S53: Adsorption and geometric properties for CHA.

| Property                                                  | CO <sub>2</sub> | N <sub>2</sub> |
|-----------------------------------------------------------|-----------------|----------------|
| Henry constant [mol kg <sup>-1</sup> kPa <sup>-1</sup> ]  | 0.01689         | 0.00103        |
| Heat of adsorption at 298 K [kJ mol <sup>-1</sup> ]       | 26.5            | 12.3           |
| Accessible volume [cm <sup>3</sup> g <sup>-1</sup> ]      | 0.402           | 0.402          |
| Accessible surface area [m <sup>2</sup> g <sup>-1</sup> ] | 1568            | 1568           |

Table S54: Performance metrics for CHA.

| Property                                                          | Value   |
|-------------------------------------------------------------------|---------|
| Shape selectivity                                                 | –       |
| Size selectivity                                                  | –       |
| Adsorption selectivity                                            | 16.39   |
| Minimum parasitic energy [kJ/kg CO <sub>2</sub> ]                 | 1587.04 |
| Purity [%] at minimum parasitic energy                            | 61.43   |
| Cost [\$ /ton of CO <sub>2</sub> captured and compressed]         | 33.59   |
| Purity [%] at optimum cost                                        | 90.00   |
| Recovery [%] at optimum cost                                      | 90.00   |
| Energy penalty [kWh/ton CO <sub>2</sub> captured] at optimum cost | 208.20  |

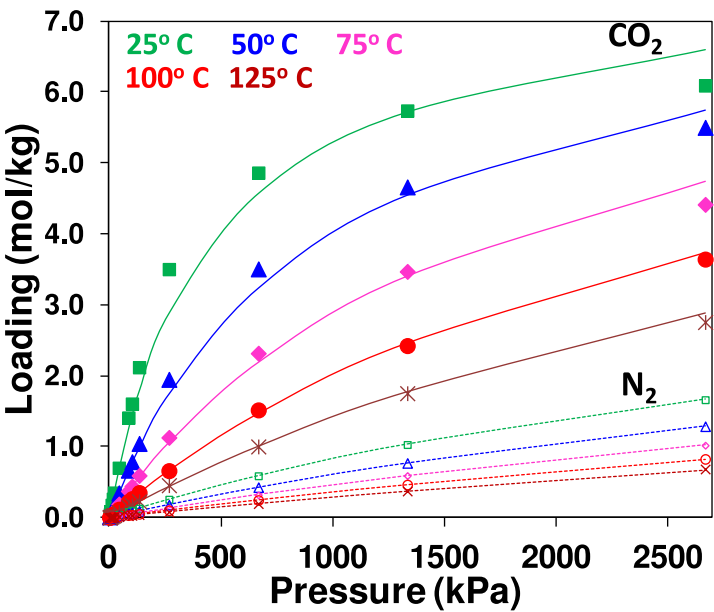

Figure S26: Adsorption isotherms of CHA. Symbols represent GCMC data, and lines represent predictions using the fitted dual-site Langmuir model (solid lines are for CO<sub>2</sub> and dashed lines are for N<sub>2</sub>).

Table S55: Dual-site Langmuir isotherm parameters for CHA.

| Parameter                                 | CO <sub>2</sub>       | N <sub>2</sub>        |
|-------------------------------------------|-----------------------|-----------------------|
| <u>Site 1</u>                             |                       |                       |
| $q^{sat}$ [mol kg <sup>-1</sup> ]         | 7.31                  | 5.02                  |
| $b^o$ [m <sup>3</sup> mol <sup>-1</sup> ] | $8.30 \times 10^{-5}$ | $1.30 \times 10^{-5}$ |
| $\Delta U$ [kJ mol <sup>-1</sup> ]        | 0                     | 9.13                  |
| <u>Site 2</u>                             |                       |                       |
| $q^{sat}$ [mol kg <sup>-1</sup> ]         | 7.31                  | 0.32                  |
| $b^o$ [m <sup>3</sup> mol <sup>-1</sup> ] | $1.00 \times 10^{-6}$ | $1.29 \times 10^{-4}$ |
| $\Delta U$ [kJ mol <sup>-1</sup> ]        | 21.03                 | 0                     |

DAC

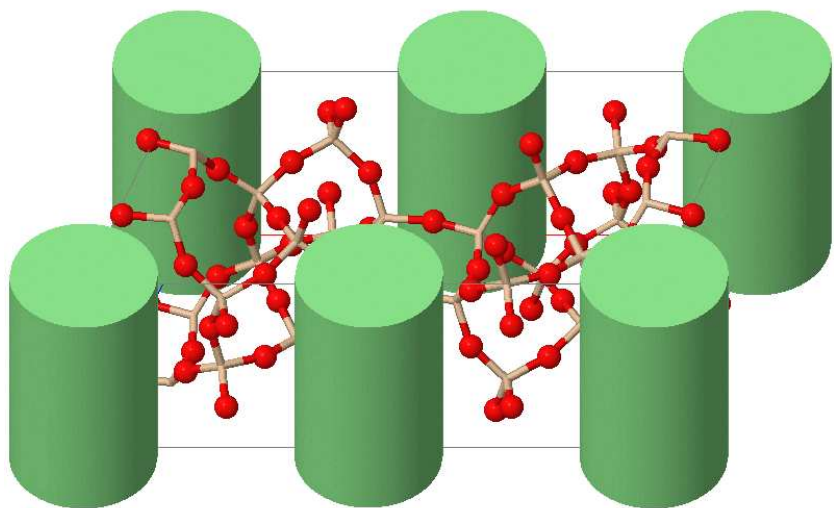

Figure S27: Main pore system of DAC from ZEOMICS. A unit cell is displayed where channels are green, cages are blue, and oxygen atoms of the zeolite structure are red.

Table S56: Physical properties for DAC.

| Property                            | Value |
|-------------------------------------|-------|
| Pore limiting diameter, PLD [Å]     | 4.8   |
| Largest cavity diameter, LCD [Å]    | 5.8   |
| Solid density [kg m <sup>-3</sup> ] | 1741  |

Table S57: Adsorption and geometric properties for DAC.

| Property                                                  | CO <sub>2</sub> | N <sub>2</sub> |
|-----------------------------------------------------------|-----------------|----------------|
| Henry constant [mol kg <sup>-1</sup> kPa <sup>-1</sup> ]  | 0.08167         | 0.00143        |
| Heat of adsorption at 298 K [kJ mol <sup>-1</sup> ]       | 31.3            | 15.9           |
| Accessible volume [cm <sup>3</sup> g <sup>-1</sup> ]      | 0.308           | 0.308          |
| Accessible surface area [m <sup>2</sup> g <sup>-1</sup> ] | 1639            | 1639           |

Table S58: Performance metrics for DAC.

| Property                                                          | Value  |
|-------------------------------------------------------------------|--------|
| Shape selectivity                                                 | –      |
| Size selectivity                                                  | –      |
| Adsorption selectivity                                            | 57.11  |
| Minimum parasitic energy [kJ/kg CO <sub>2</sub> ]                 | 841.70 |
| Purity [%] at minimum parasitic energy                            | 86.84  |
| Cost [\$ /ton of CO <sub>2</sub> captured and compressed]         | 34.94  |
| Purity [%] at optimum cost                                        | 90.36  |
| Recovery [%] at optimum cost                                      | 91.57  |
| Energy penalty [kWh/ton CO <sub>2</sub> captured] at optimum cost | 196.20 |

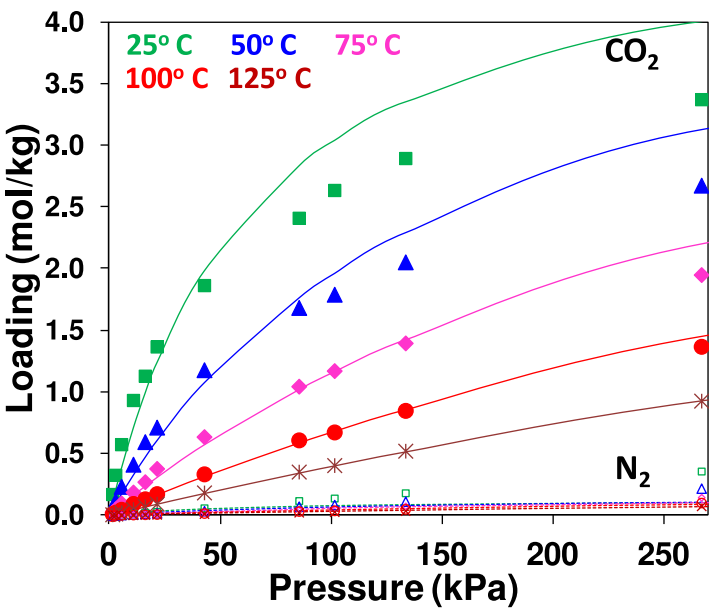

Figure S28: Adsorption isotherms of DAC. Symbols represent GCMC data, and lines represent predictions using the fitted dual-site Langmuir model (solid lines are for CO<sub>2</sub> and dashed lines are for N<sub>2</sub>).

Table S59: Dual-site Langmuir isotherm parameters for DAC.

| Parameter                                 | CO <sub>2</sub>       | N <sub>2</sub>        |
|-------------------------------------------|-----------------------|-----------------------|
| <u>Site 1</u>                             |                       |                       |
| $q^{sat}$ [mol kg <sup>-1</sup> ]         | 5.09                  | 5.38                  |
| $b^o$ [m <sup>3</sup> mol <sup>-1</sup> ] | $1.00 \times 10^{-6}$ | $2.00 \times 10^{-6}$ |
| $\Delta U$ [kJ mol <sup>-1</sup> ]        | 25.56                 | 14.97                 |
| <u>Site 2</u>                             |                       |                       |
| $q^{sat}$ [mol kg <sup>-1</sup> ]         | 5.38                  | 0                     |
| $b^o$ [m <sup>3</sup> mol <sup>-1</sup> ] | 0                     | 0                     |
| $\Delta U$ [kJ mol <sup>-1</sup> ]        | 29.65                 | 28.72                 |

DFT

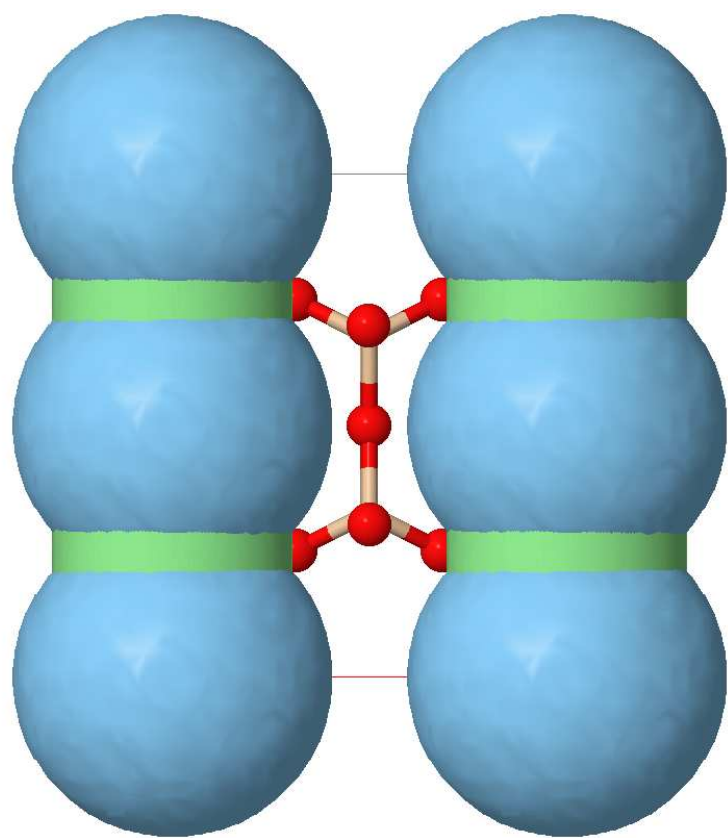

Figure S29: Main pore system of DFT from ZEOMICS. A unit cell is displayed where channels are green, cages are blue, and oxygen atoms of the zeolite structure are red.

Table S60: Physical properties for DFT.

| Property                            | Value |
|-------------------------------------|-------|
| Pore limiting diameter, PLD [Å]     | 4.3   |
| Largest cavity diameter, LCD [Å]    | 5.7   |
| Solid density [kg m <sup>-3</sup> ] | 1767  |

Table S61: Adsorption and geometric properties for DFT.

| Property                                                  | CO <sub>2</sub> | N <sub>2</sub> |
|-----------------------------------------------------------|-----------------|----------------|
| Henry constant [mol kg <sup>-1</sup> kPa <sup>-1</sup> ]  | 0.08991         | 0.00140        |
| Heat of adsorption at 298 K [kJ mol <sup>-1</sup> ]       | 36.8            | 18.6           |
| Accessible volume [cm <sup>3</sup> g <sup>-1</sup> ]      | 0.331           | 0.331          |
| Accessible surface area [m <sup>2</sup> g <sup>-1</sup> ] | 1775            | 1775           |

Table S62: Performance metrics for DFT.

| Property                                                          | Value  |
|-------------------------------------------------------------------|--------|
| Shape selectivity                                                 | –      |
| Size selectivity                                                  | –      |
| Adsorption selectivity                                            | 64.27  |
| Minimum parasitic energy [kJ/kg CO <sub>2</sub> ]                 | 887.36 |
| Purity [%] at minimum parasitic energy                            | 86.55  |
| Cost [\$ /ton of CO <sub>2</sub> captured and compressed]         | 40.99  |
| Purity [%] at optimum cost                                        | 90.00  |
| Recovery [%] at optimum cost                                      | 90.00  |
| Energy penalty [kWh/ton CO <sub>2</sub> captured] at optimum cost | 239.24 |

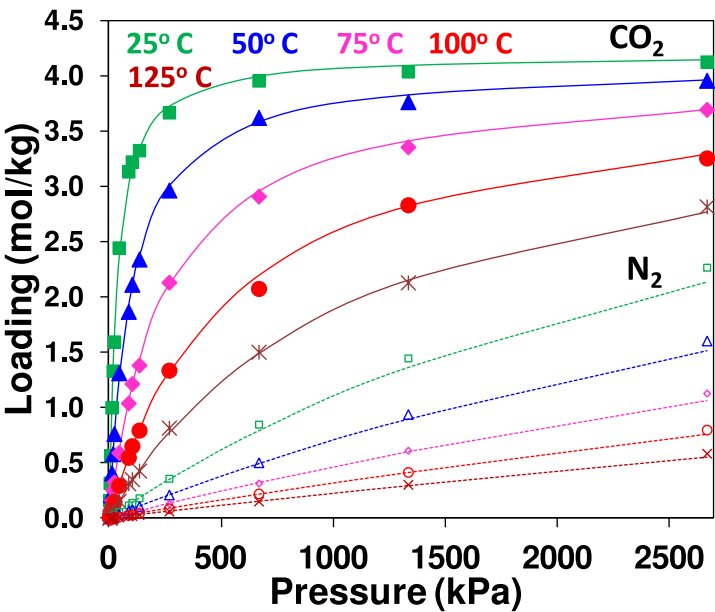

Figure S30: Adsorption isotherms of DFT. Symbols represent GCMC data, and lines represent predictions using the fitted dual-site Langmuir model (solid lines are for CO<sub>2</sub> and dashed lines are for N<sub>2</sub>).

Table S63: Dual-site Langmuir isotherm parameters for DFT.

| Parameter                                 | CO <sub>2</sub>       | N <sub>2</sub>        |
|-------------------------------------------|-----------------------|-----------------------|
| <u>Site 1</u>                             |                       |                       |
| $q^{sat}$ [mol kg <sup>-1</sup> ]         | 3.74                  | 4.95                  |
| $b^o$ [m <sup>3</sup> mol <sup>-1</sup> ] | 0                     | $2.00 \times 10^{-6}$ |
| $\Delta U$ [kJ mol <sup>-1</sup> ]        | 0                     | 14.86                 |
| <u>Site 2</u>                             |                       |                       |
| $q^{sat}$ [mol kg <sup>-1</sup> ]         | 4.95                  | 0                     |
| $b^o$ [m <sup>3</sup> mol <sup>-1</sup> ] | $1.60 \times 10^{-7}$ | $1.50 \times 10^{-7}$ |
| $\Delta U$ [kJ mol <sup>-1</sup> ]        | 31.95                 | 27.82                 |

EAB

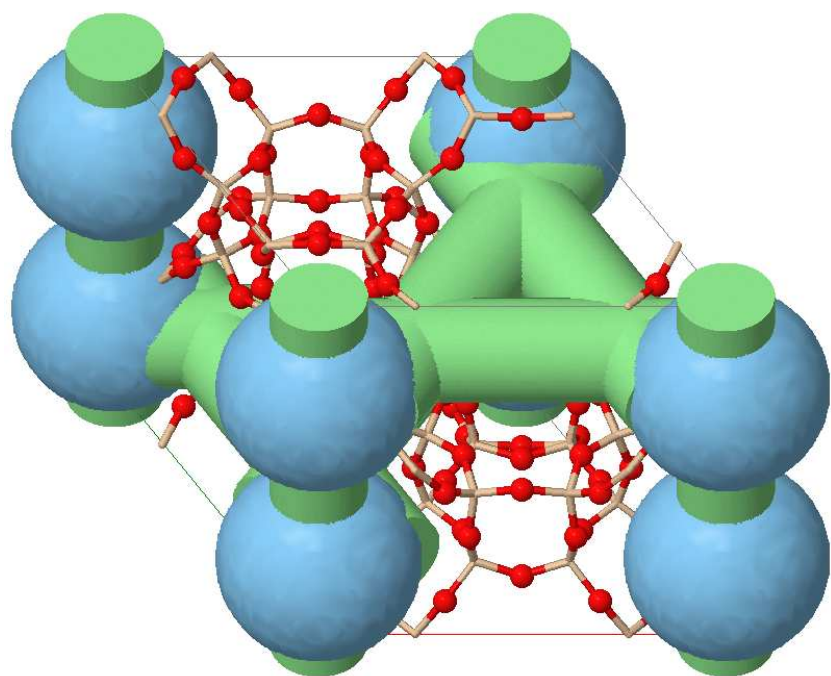

Figure S31: Main pore system of EAB from ZEOMICS. A unit cell is displayed where channels are green, cages are blue, and oxygen atoms of the zeolite structure are red.

Table S64: Physical properties for EAB.

| Property                            | Value |
|-------------------------------------|-------|
| Pore limiting diameter, PLD [Å]     | 3.4   |
| Largest cavity diameter, LCD [Å]    | 7.4   |
| Solid density [kg m <sup>-3</sup> ] | 1592  |

Table S65: Adsorption and geometric properties for EAB.

| Property                                                  | CO <sub>2</sub> | N <sub>2</sub> |
|-----------------------------------------------------------|-----------------|----------------|
| Henry constant [mol kg <sup>-1</sup> kPa <sup>-1</sup> ]  | 0.01636         | 0.00061        |
| Heat of adsorption at 298 K [kJ mol <sup>-1</sup> ]       | 29.0            | 11.5           |
| Accessible volume [cm <sup>3</sup> g <sup>-1</sup> ]      | –               | 0.260          |
| Accessible surface area [m <sup>2</sup> g <sup>-1</sup> ] | –               | 1745           |

Table S66: Performance metrics for EAB.

| Property                                                          | Value   |
|-------------------------------------------------------------------|---------|
| Shape selectivity                                                 | –       |
| Size selectivity                                                  | 1.00    |
| Adsorption selectivity                                            | 26.62   |
| Minimum parasitic energy [kJ/kg CO <sub>2</sub> ]                 | 1224.72 |
| Purity [%] at minimum parasitic energy                            | 70.03   |
| Cost [\$ /ton of CO <sub>2</sub> captured and compressed]         | 41.02   |
| Purity [%] at optimum cost                                        | 90.00   |
| Recovery [%] at optimum cost                                      | 90.00   |
| Energy penalty [kWh/ton CO <sub>2</sub> captured] at optimum cost | 191.03  |

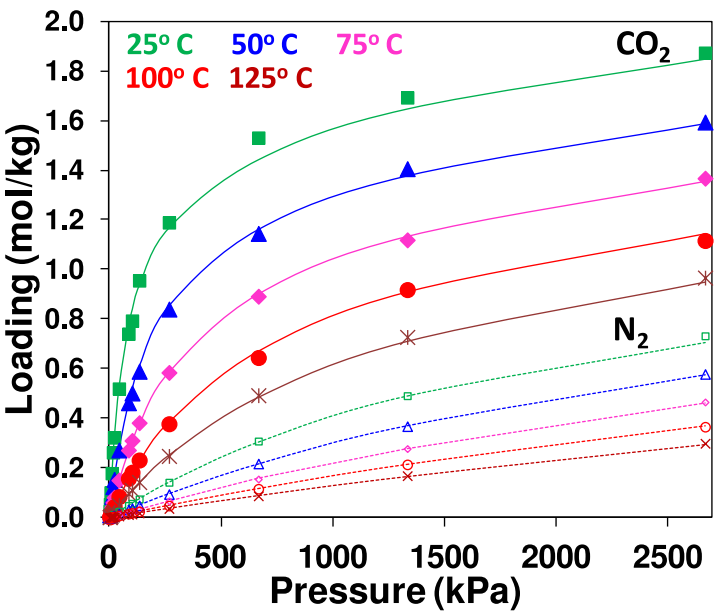

Figure S32: Adsorption isotherms of EAB. Symbols represent GCMC data, and lines represent predictions using the fitted dual-site Langmuir model (solid lines are for CO<sub>2</sub> and dashed lines are for N<sub>2</sub>).

Table S67: Dual-site Langmuir isotherm parameters for EAB.

| Parameter                                 | CO <sub>2</sub>       | N <sub>2</sub>        |
|-------------------------------------------|-----------------------|-----------------------|
| <u>Site 1</u>                             |                       |                       |
| $q^{sat}$ [mol kg <sup>-1</sup> ]         | 2.25                  | 2.25                  |
| $b^o$ [m <sup>3</sup> mol <sup>-1</sup> ] | $2.00 \times 10^{-6}$ | $7.00 \times 10^{-6}$ |
| $\Delta U$ [kJ mol <sup>-1</sup> ]        | 13.61                 | 11.40                 |
| <u>Site 2</u>                             |                       |                       |
| $q^{sat}$ [mol kg <sup>-1</sup> ]         | 2.25                  | 0                     |
| $b^o$ [m <sup>3</sup> mol <sup>-1</sup> ] | $7.60 \times 10^{-7}$ | $4.00 \times 10^{-6}$ |
| $\Delta U$ [kJ mol <sup>-1</sup> ]        | 25.38                 | 20.14                 |



EON

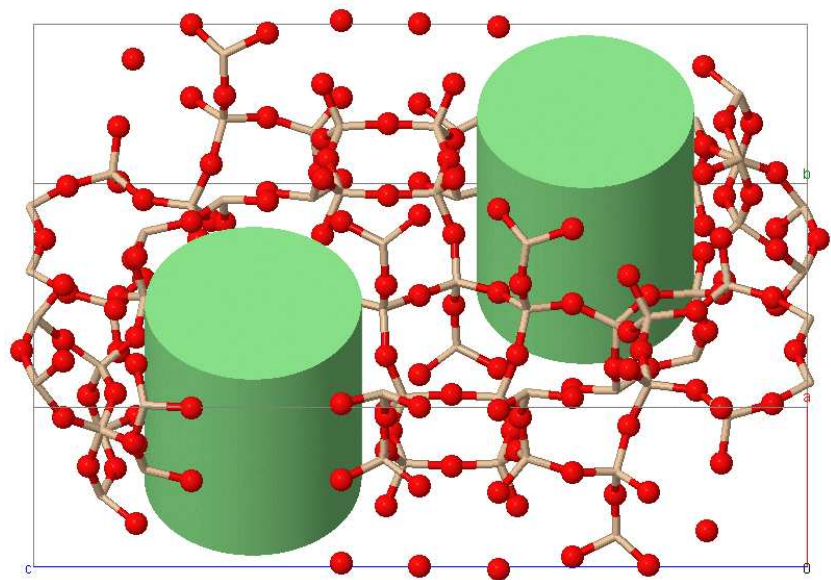

Figure S33: Main pore system of EON from ZEOMICS. A unit cell is displayed where channels are green, cages are blue, and oxygen atoms of the zeolite structure are red.

Table S68: Physical properties for EON.

| Property                            | Value |
|-------------------------------------|-------|
| Pore limiting diameter, PLD [Å]     | 7.3   |
| Largest cavity diameter, LCD [Å]    | 7.3   |
| Solid density [kg m <sup>-3</sup> ] | 1680  |

Table S69: Adsorption and geometric properties for EON.

| Property                                                  | CO <sub>2</sub> | N <sub>2</sub> |
|-----------------------------------------------------------|-----------------|----------------|
| Henry constant [mol kg <sup>-1</sup> kPa <sup>-1</sup> ]  | 0.01372         | 0.00101        |
| Heat of adsorption at 298 K [kJ mol <sup>-1</sup> ]       | 26.9            | 14.6           |
| Accessible volume [cm <sup>3</sup> g <sup>-1</sup> ]      | 0.122           | 0.236          |
| Accessible surface area [m <sup>2</sup> g <sup>-1</sup> ] | 577             | 1140           |

Table S70: Performance metrics for EON.

| Property                                                          | Value  |
|-------------------------------------------------------------------|--------|
| Shape selectivity                                                 | –      |
| Size selectivity                                                  | 0.48   |
| Adsorption selectivity                                            | 13.64  |
| Minimum parasitic energy [kJ/kg CO <sub>2</sub> ]                 | 948.99 |
| Purity [%] at minimum parasitic energy                            | 84.08  |
| Cost [\$ /ton of CO <sub>2</sub> captured and compressed]         | 34.14  |
| Purity [%] at optimum cost                                        | 90.00  |
| Recovery [%] at optimum cost                                      | 90.00  |
| Energy penalty [kWh/ton CO <sub>2</sub> captured] at optimum cost | 223.97 |

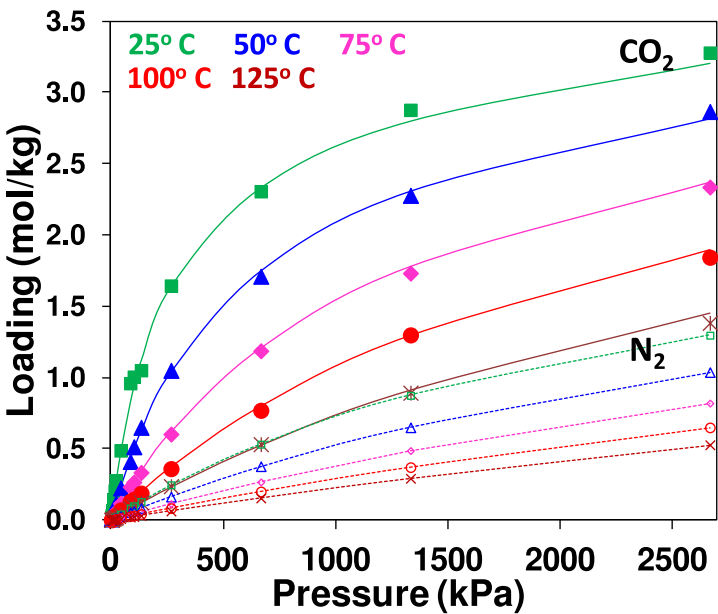

Figure S34: Adsorption isotherms of EON. Symbols represent GCMC data, and lines represent predictions using the fitted dual-site Langmuir model (solid lines are for CO<sub>2</sub> and dashed lines are for N<sub>2</sub>).

Table S71: Dual-site Langmuir isotherm parameters for EON.

| Parameter                                 | CO <sub>2</sub>       | N <sub>2</sub>        |
|-------------------------------------------|-----------------------|-----------------------|
| <u>Site 1</u>                             |                       |                       |
| $q^{sat}$ [mol kg <sup>-1</sup> ]         | 3.94                  | 3.94                  |
| $b^o$ [m <sup>3</sup> mol <sup>-1</sup> ] | $3.00 \times 10^{-6}$ | $7.00 \times 10^{-6}$ |
| $\Delta U$ [kJ mol <sup>-1</sup> ]        | 12.27                 | 11.25                 |
| <u>Site 2</u>                             |                       |                       |
| $q^{sat}$ [mol kg <sup>-1</sup> ]         | 2.64                  | 0.16                  |
| $b^o$ [m <sup>3</sup> mol <sup>-1</sup> ] | $6.00 \times 10^{-7}$ | 0                     |
| $\Delta U$ [kJ mol <sup>-1</sup> ]        | 24.57                 | 43.26                 |

ERI

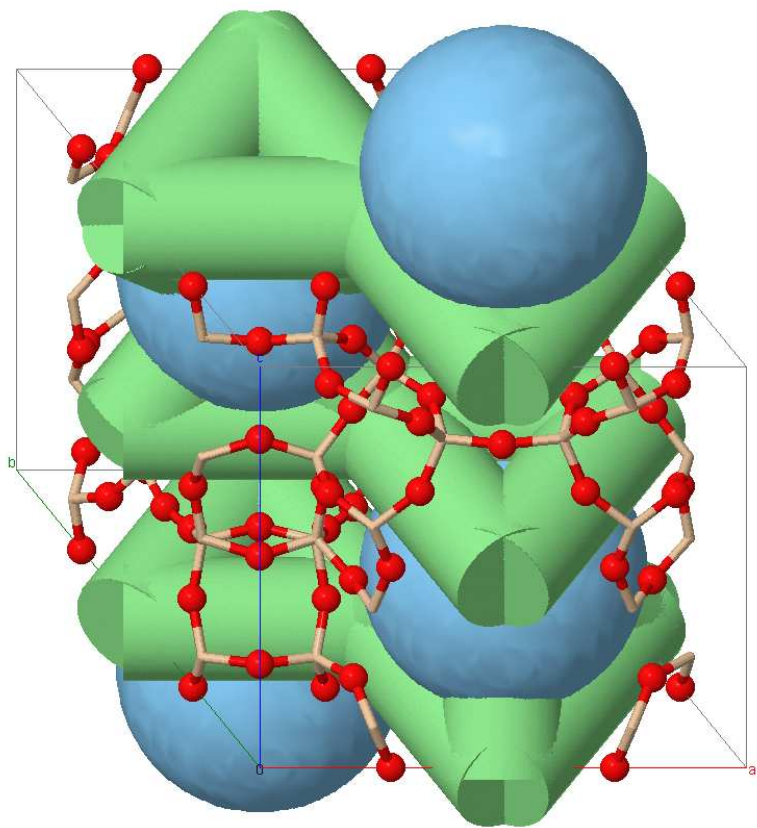

Figure S35: Main pore system of ERI from ZEOMICS. A unit cell is displayed where channels are green, cages are blue, and oxygen atoms of the zeolite structure are red.

Table S72: Physical properties for ERI.

| Property                            | Value |
|-------------------------------------|-------|
| Pore limiting diameter, PLD [Å]     | 3.3   |
| Largest cavity diameter, LCD [Å]    | 7.7   |
| Solid density [kg m <sup>-3</sup> ] | 1604  |

Table S73: Adsorption and geometric properties for ERI.

| Property                                                  | CO <sub>2</sub> | N <sub>2</sub> |
|-----------------------------------------------------------|-----------------|----------------|
| Henry constant [mol kg <sup>-1</sup> kPa <sup>-1</sup> ]  | 0.01211         | 0.00088        |
| Heat of adsorption at 298 K [kJ mol <sup>-1</sup> ]       | 25.2            | 12.3           |
| Accessible volume [cm <sup>3</sup> g <sup>-1</sup> ]      | –               | 0.328          |
| Accessible surface area [m <sup>2</sup> g <sup>-1</sup> ] | –               | 817            |

Table S74: Performance metrics for ERI.

| Property                                                          | Value   |
|-------------------------------------------------------------------|---------|
| Shape selectivity                                                 | –       |
| Size selectivity                                                  | –       |
| Adsorption selectivity                                            | 13.82   |
| Minimum parasitic energy [kJ/kg CO <sub>2</sub> ]                 | 1779.39 |
| Purity [%] at minimum parasitic energy                            | 57.78   |
| Cost [\$ /ton of CO <sub>2</sub> captured and compressed]         | 29.75   |
| Purity [%] at optimum cost                                        | 90.06   |
| Recovery [%] at optimum cost                                      | 91.31   |
| Energy penalty [kWh/ton CO <sub>2</sub> captured] at optimum cost | 179.26  |

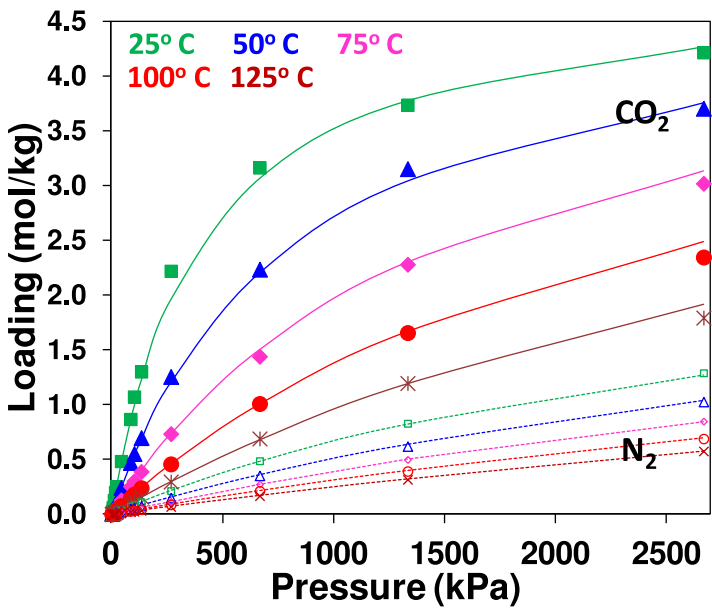

Figure S36: Adsorption isotherms of ERI. Symbols represent GCMC data, and lines represent predictions using the fitted dual-site Langmuir model (solid lines are for CO<sub>2</sub> and dashed lines are for N<sub>2</sub>).

Table S75: Dual-site Langmuir isotherm parameters for ERI.

| Parameter                                 | CO <sub>2</sub>       | N <sub>2</sub>        |
|-------------------------------------------|-----------------------|-----------------------|
| <u>Site 1</u>                             |                       |                       |
| $q^{sat}$ [mol kg <sup>-1</sup> ]         | 4.65                  | 2.81                  |
| $b^o$ [m <sup>3</sup> mol <sup>-1</sup> ] | 0                     | $2.30 \times 10^{-5}$ |
| $\Delta U$ [kJ mol <sup>-1</sup> ]        | 3.61                  | 8.70                  |
| <u>Site 2</u>                             |                       |                       |
| $q^{sat}$ [mol kg <sup>-1</sup> ]         | 4.90                  | 0                     |
| $b^o$ [m <sup>3</sup> mol <sup>-1</sup> ] | $2.00 \times 10^{-6}$ | 0                     |
| $\Delta U$ [kJ mol <sup>-1</sup> ]        | 20.20                 | 50.00                 |

**FAR**

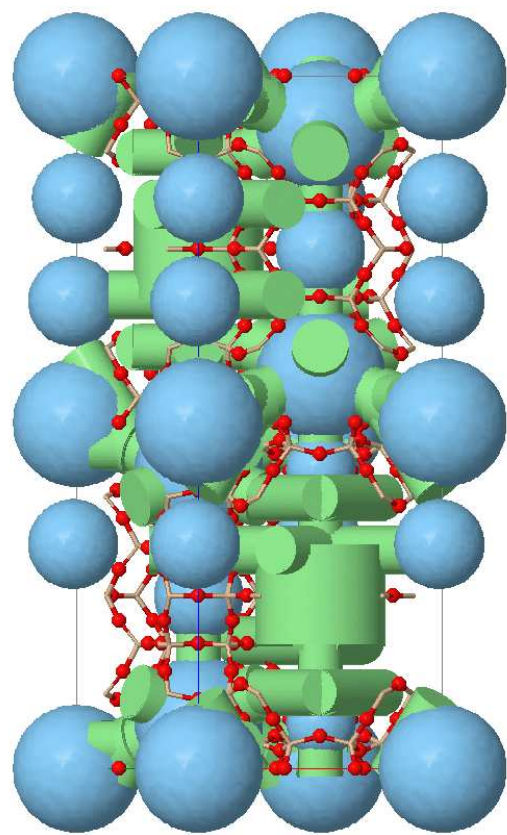

Figure S37: Main pore system of FAR from ZEOMICS. A unit cell is displayed where channels are green, cages are blue, and oxygen atoms of the zeolite structure are red.

Table S76: Physical properties for FAR.

| Property                            | Value |
|-------------------------------------|-------|
| Pore limiting diameter, PLD [Å]     | 2.7   |
| Largest cavity diameter, LCD [Å]    | 6.7   |
| Solid density [kg m <sup>-3</sup> ] | 1705  |

Table S77: Adsorption and geometric properties for FAR.

| Property                                                  | CO <sub>2</sub> | N <sub>2</sub> |
|-----------------------------------------------------------|-----------------|----------------|
| Henry constant [mol kg <sup>-1</sup> kPa <sup>-1</sup> ]  | 0.00804         | 0.00080        |
| Heat of adsorption at 298 K [kJ mol <sup>-1</sup> ]       | 26.5            | 15.2           |
| Accessible volume [cm <sup>3</sup> g <sup>-1</sup> ]      | –               | –              |
| Accessible surface area [m <sup>2</sup> g <sup>-1</sup> ] | –               | –              |

Table S78: Performance metrics for FAR.

| Property                                                          | Value  |
|-------------------------------------------------------------------|--------|
| Shape selectivity                                                 | 0.34   |
| Size selectivity                                                  | –      |
| Adsorption selectivity                                            | 10.01  |
| Minimum parasitic energy [kJ/kg CO <sub>2</sub> ]                 | –      |
| Purity [%] at minimum parasitic energy                            | –      |
| Cost [\$ /ton of CO <sub>2</sub> captured and compressed]         | 41.45  |
| Purity [%] at optimum cost                                        | 90.00  |
| Recovery [%] at optimum cost                                      | 90.00  |
| Energy penalty [kWh/ton CO <sub>2</sub> captured] at optimum cost | 233.72 |

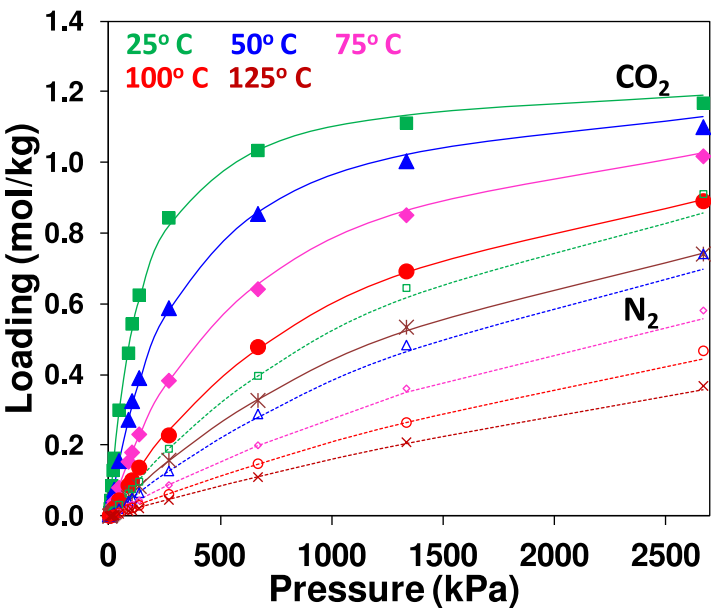

Figure S38: Adsorption isotherms of FAR. Symbols represent GCMC data, and lines represent predictions using the fitted dual-site Langmuir model (solid lines are for CO<sub>2</sub> and dashed lines are for N<sub>2</sub>).

Table S79: Dual-site Langmuir isotherm parameters for FAR.

| Parameter                                 | CO <sub>2</sub>       | N <sub>2</sub>        |
|-------------------------------------------|-----------------------|-----------------------|
| <u>Site 1</u>                             |                       |                       |
| $q^{sat}$ [mol kg <sup>-1</sup> ]         | 1.40                  | 1.40                  |
| $b^o$ [m <sup>3</sup> mol <sup>-1</sup> ] | 0                     | $1.00 \times 10^{-5}$ |
| $\Delta U$ [kJ mol <sup>-1</sup> ]        | 0                     | 12.28                 |
| <u>Site 2</u>                             |                       |                       |
| $q^{sat}$ [mol kg <sup>-1</sup> ]         | 1.40                  | 0                     |
| $b^o$ [m <sup>3</sup> mol <sup>-1</sup> ] | $2.00 \times 10^{-6}$ | $8.00 \times 10^{-8}$ |
| $\Delta U$ [kJ mol <sup>-1</sup> ]        | 22.75                 | 24.89                 |

FAU

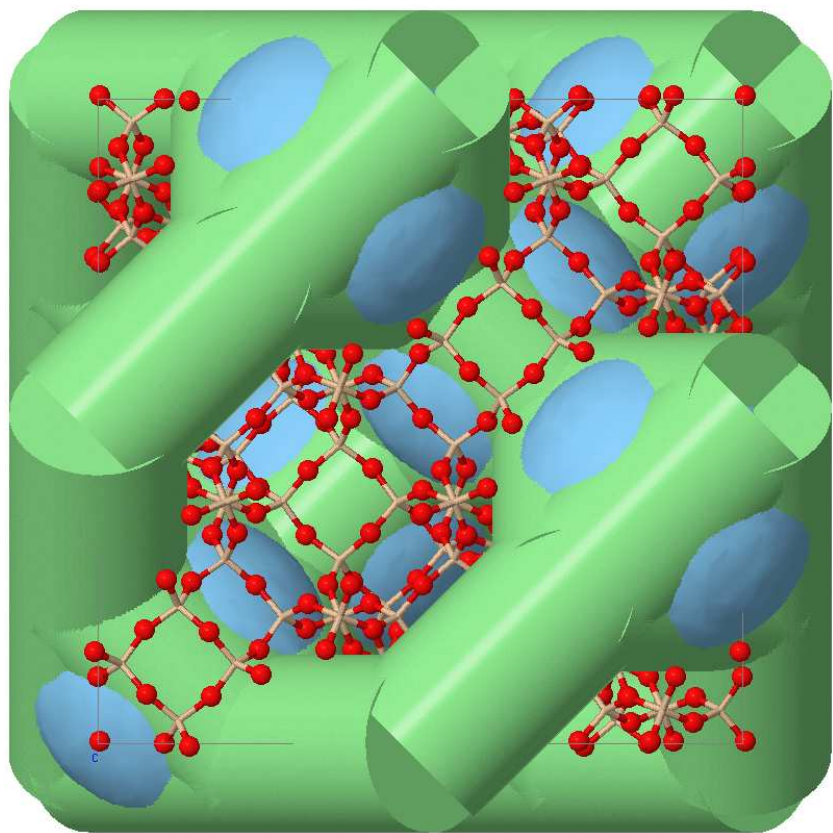

Figure S39: Main pore system of FAU from ZEOMICS. A unit cell is displayed where channels are green, cages are blue, and oxygen atoms of the zeolite structure are red.

Table S80: Physical properties for FAU.

| Property                            | Value |
|-------------------------------------|-------|
| Pore limiting diameter, PLD [Å]     | 6.7   |
| Largest cavity diameter, LCD [Å]    | 11.9  |
| Solid density [kg m <sup>-3</sup> ] | 1328  |

Table S81: Adsorption and geometric properties for FAU.

| Property                                                  | CO <sub>2</sub> | N <sub>2</sub> |
|-----------------------------------------------------------|-----------------|----------------|
| Henry constant [mol kg <sup>-1</sup> kPa <sup>-1</sup> ]  | 0.00291         | 0.00055        |
| Heat of adsorption at 298 K [kJ mol <sup>-1</sup> ]       | 19.6            | 8.5            |
| Accessible volume [cm <sup>3</sup> g <sup>-1</sup> ]      | 0.402           | 0.402          |
| Accessible surface area [m <sup>2</sup> g <sup>-1</sup> ] | 1190            | 1190           |



Table S82: Performance metrics for FAU.

| Property                                                          | Value   |
|-------------------------------------------------------------------|---------|
| Shape selectivity                                                 | –       |
| Size selectivity                                                  | –       |
| Adsorption selectivity                                            | 5.29    |
| Minimum parasitic energy [kJ/kg CO <sub>2</sub> ]                 | 3794.76 |
| Purity [%] at minimum parasitic energy                            | 37.54   |
| Cost [\$ /ton of CO <sub>2</sub> captured and compressed]         | 43.42   |
| Purity [%] at optimum cost                                        | 47.26   |
| Recovery [%] at optimum cost                                      | 36.49   |
| Energy penalty [kWh/ton CO <sub>2</sub> captured] at optimum cost | 293.02  |

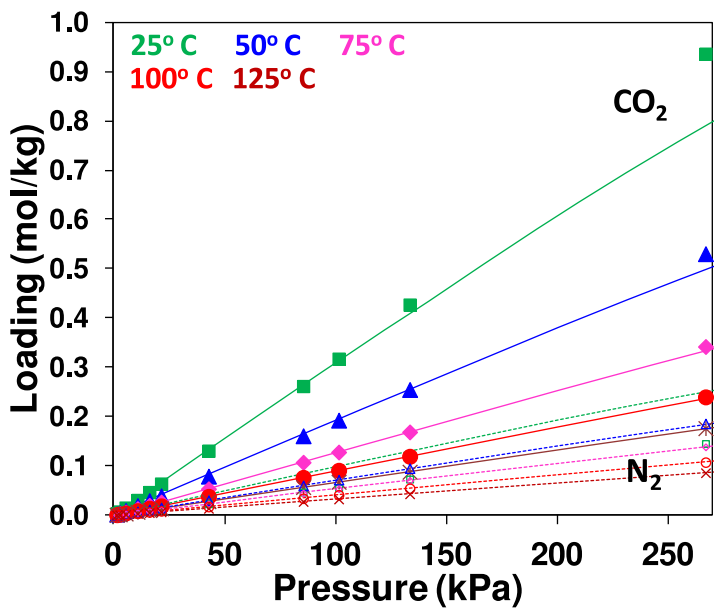

Figure S40: Adsorption isotherms of FAU. Symbols represent GCMC data, and lines represent predictions using the fitted dual-site Langmuir model (solid lines are for CO<sub>2</sub> and dashed lines are for N<sub>2</sub>).

Table S83: Dual-site Langmuir isotherm parameters for FAU.

| Parameter                                 | CO <sub>2</sub>       | N <sub>2</sub>        |
|-------------------------------------------|-----------------------|-----------------------|
| <u>Site 1</u>                             |                       |                       |
| $q^{sat}$ [mol kg <sup>-1</sup> ]         | 7.33                  | 7.33                  |
| $b^o$ [m <sup>3</sup> mol <sup>-1</sup> ] | $3.40 \times 10^{-7}$ | $1.20 \times 10^{-5}$ |
| $\Delta U$ [kJ mol <sup>-1</sup> ]        | 17.95                 | 8.32                  |
| <u>Site 2</u>                             |                       |                       |
| $q^{sat}$ [mol kg <sup>-1</sup> ]         | 7.33                  | 0.14                  |
| $b^o$ [m <sup>3</sup> mol <sup>-1</sup> ] | $1.20 \times 10^{-5}$ | 0                     |
| $\Delta U$ [kJ mol <sup>-1</sup> ]        | 9.61                  | 11.27                 |



FRA

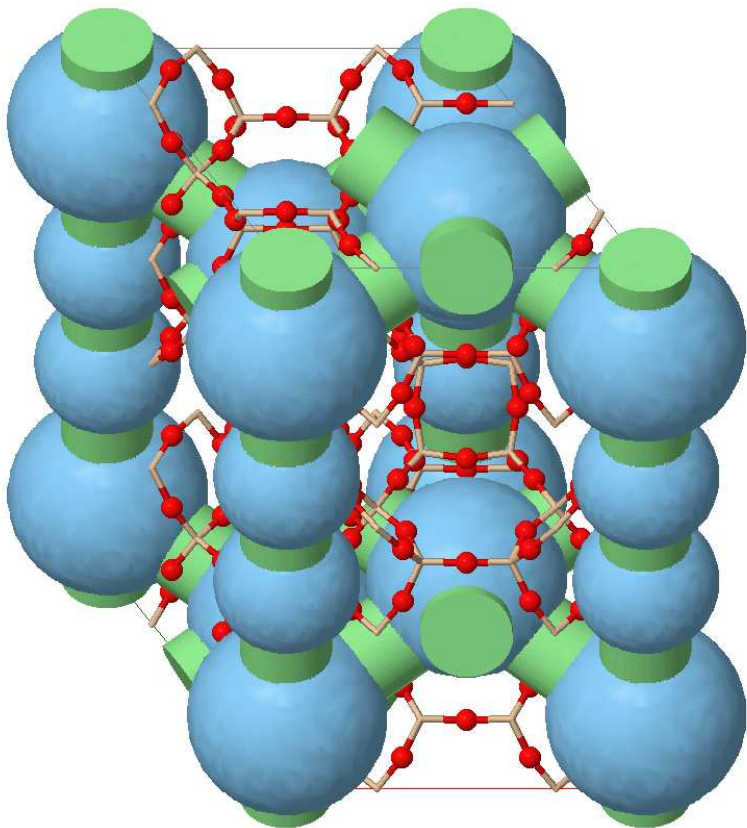

Figure S41: Main pore system of FRA from ZEOMICS. A unit cell is displayed where channels are green, cages are blue, and oxygen atoms of the zeolite structure are red.

Table S84: Physical properties for FRA.

| Property                            | Value |
|-------------------------------------|-------|
| Pore limiting diameter, PLD [Å]     | 3.3   |
| Largest cavity diameter, LCD [Å]    | 7.3   |
| Solid density [kg m <sup>-3</sup> ] | 1561  |

Table S85: Adsorption and geometric properties for FRA.

| Property                                                  | CO <sub>2</sub> | N <sub>2</sub> |
|-----------------------------------------------------------|-----------------|----------------|
| Henry constant [mol kg <sup>-1</sup> kPa <sup>-1</sup> ]  | 0.02215         | 0.00147        |
| Heat of adsorption at 298 K [kJ mol <sup>-1</sup> ]       | 24.7            | 15.1           |
| Accessible volume [cm <sup>3</sup> g <sup>-1</sup> ]      | –               | 0.290          |
| Accessible surface area [m <sup>2</sup> g <sup>-1</sup> ] | –               | 1383           |

Table S86: Performance metrics for FRA.

| Property                                                          | Value  |
|-------------------------------------------------------------------|--------|
| Shape selectivity                                                 | 0.05   |
| Size selectivity                                                  | 1.00   |
| Adsorption selectivity                                            | 15.07  |
| Minimum parasitic energy [kJ/kg CO <sub>2</sub> ]                 | –      |
| Purity [%] at minimum parasitic energy                            | –      |
| Cost [\$ /ton of CO <sub>2</sub> captured and compressed]         | 50.83  |
| Purity [%] at optimum cost                                        | 90.20  |
| Recovery [%] at optimum cost                                      | 88.88  |
| Energy penalty [kWh/ton CO <sub>2</sub> captured] at optimum cost | 246.09 |

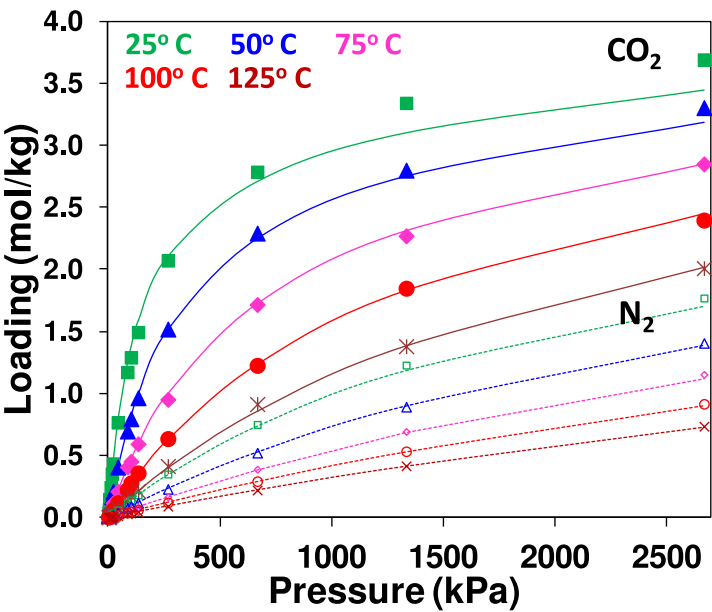

Figure S42: Adsorption isotherms of FRA. Symbols represent GCMC data, and lines represent predictions using the fitted dual-site Langmuir model (solid lines are for CO<sub>2</sub> and dashed lines are for N<sub>2</sub>).

Table S87: Dual-site Langmuir isotherm parameters for FRA.

| Parameter                                 | CO <sub>2</sub>       | N <sub>2</sub>        |
|-------------------------------------------|-----------------------|-----------------------|
| <u>Site 1</u>                             |                       |                       |
| $q^{sat}$ [mol kg <sup>-1</sup> ]         | 4.43                  | 4.43                  |
| $b^o$ [m <sup>3</sup> mol <sup>-1</sup> ] | $3.00 \times 10^{-6}$ | $1.00 \times 10^{-5}$ |
| $\Delta U$ [kJ mol <sup>-1</sup> ]        | 11.78                 | 10.93                 |
| <u>Site 2</u>                             |                       |                       |
| $q^{sat}$ [mol kg <sup>-1</sup> ]         | 4.43                  | 0                     |
| $b^o$ [m <sup>3</sup> mol <sup>-1</sup> ] | $7.20 \times 10^{-7}$ | $2.50 \times 10^{-7}$ |
| $\Delta U$ [kJ mol <sup>-1</sup> ]        | 24.45                 | 25.79                 |

GIS

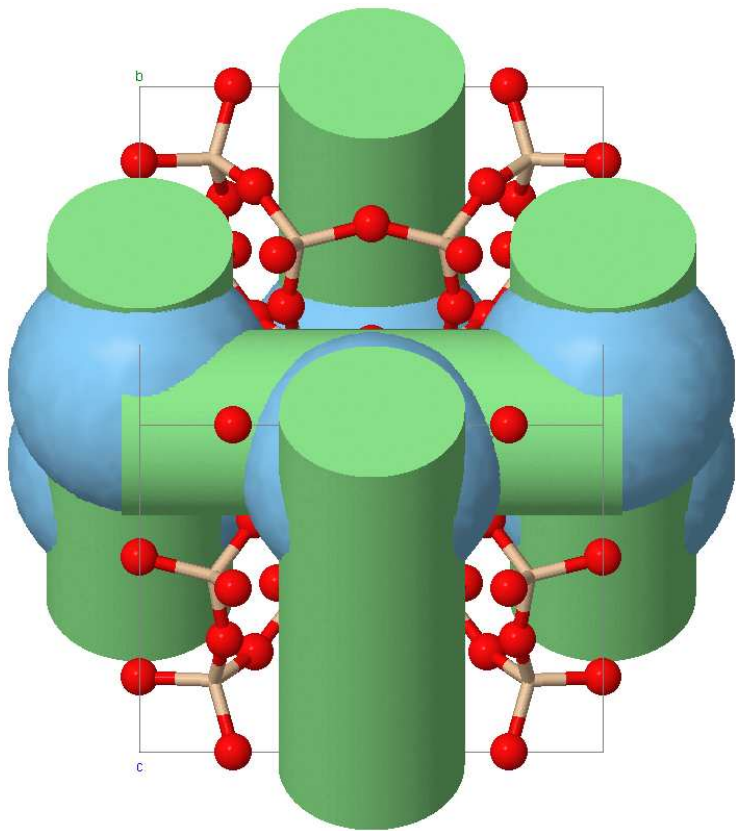

Figure S43: Main pore system of GIS from ZEOMICS. A unit cell is displayed where channels are green, cages are blue, and oxygen atoms of the zeolite structure are red.

Table S88: Physical properties for GIS.

| Property                            | Value |
|-------------------------------------|-------|
| Pore limiting diameter, PLD [Å]     | 3.9   |
| Largest cavity diameter, LCD [Å]    | 5.6   |
| Solid density [kg m <sup>-3</sup> ] | 1636  |

Table S89: Adsorption and geometric properties for GIS.

| Property                                                  | CO <sub>2</sub> | N <sub>2</sub> |
|-----------------------------------------------------------|-----------------|----------------|
| Henry constant [mol kg <sup>-1</sup> kPa <sup>-1</sup> ]  | 0.14461         | 0.00120        |
| Heat of adsorption at 298 K [kJ mol <sup>-1</sup> ]       | 33.7            | 15.6           |
| Accessible volume [cm <sup>3</sup> g <sup>-1</sup> ]      | 0.376           | 0.376          |
| Accessible surface area [m <sup>2</sup> g <sup>-1</sup> ] | 1255            | 1255           |

Table S90: Performance metrics for GIS.

| Property                                                          | Value  |
|-------------------------------------------------------------------|--------|
| Shape selectivity                                                 | –      |
| Size selectivity                                                  | –      |
| Adsorption selectivity                                            | 120.9  |
| Minimum parasitic energy [kJ/kg CO <sub>2</sub> ]                 | 793.66 |
| Purity [%] at minimum parasitic energy                            | 89.68  |
| Cost [\$ /ton of CO <sub>2</sub> captured and compressed]         | 30.55  |
| Purity [%] at optimum cost                                        | 90.00  |
| Recovery [%] at optimum cost                                      | 90.89  |
| Energy penalty [kWh/ton CO <sub>2</sub> captured] at optimum cost | 159.39 |

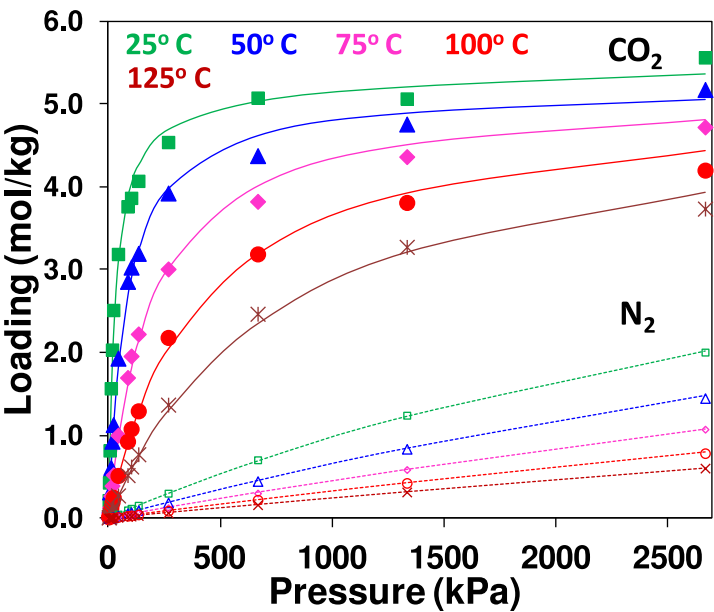

Figure S44: Adsorption isotherms of GIS. Symbols represent GCMC data, and lines represent predictions using the fitted dual-site Langmuir model (solid lines are for CO<sub>2</sub> and dashed lines are for N<sub>2</sub>).

Table S91: Dual-site Langmuir isotherm parameters for GIS.

| Parameter                                 | CO <sub>2</sub>       | N <sub>2</sub>        |
|-------------------------------------------|-----------------------|-----------------------|
| <u>Site 1</u>                             |                       |                       |
| $q^{sat}$ [mol kg <sup>-1</sup> ]         | 6.68                  | 6.33                  |
| $b^o$ [m <sup>3</sup> mol <sup>-1</sup> ] | 0                     | $3.00 \times 10^{-6}$ |
| $\Delta U$ [kJ mol <sup>-1</sup> ]        | 50.00                 | 12.52                 |
| <u>Site 2</u>                             |                       |                       |
| $q^{sat}$ [mol kg <sup>-1</sup> ]         | 5.15                  | 0.02                  |
| $b^o$ [m <sup>3</sup> mol <sup>-1</sup> ] | $5.20 \times 10^{-7}$ | $7.20 \times 10^{-5}$ |
| $\Delta U$ [kJ mol <sup>-1</sup> ]        | 29.79                 | 0                     |

GIU

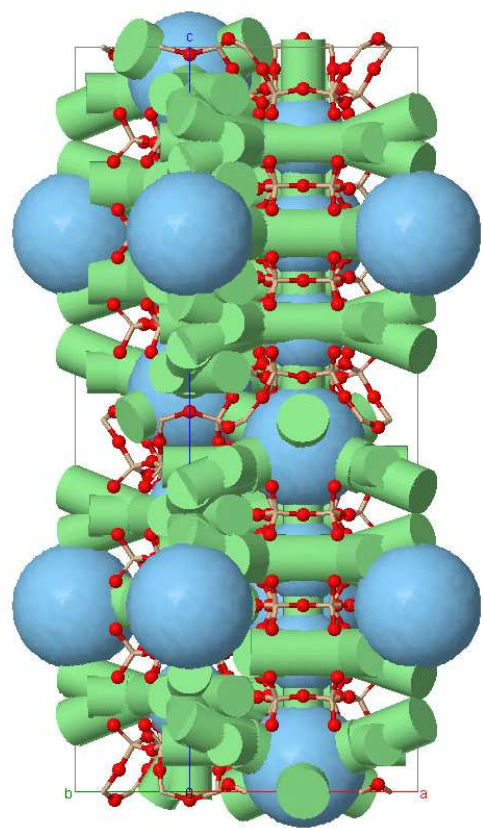

Figure S45: Main pore system of GIU from ZEOMICS. A unit cell is displayed where channels are green, cages are blue, and oxygen atoms of the zeolite structure are red.

Table S92: Physical properties for GIU.

| Property                            | Value |
|-------------------------------------|-------|
| Pore limiting diameter, PLD [Å]     | 2.9   |
| Largest cavity diameter, LCD [Å]    | 7.0   |
| Solid density [kg m <sup>-3</sup> ] | 1709  |

Table S93: Adsorption and geometric properties for GIU.

| Property                                                  | CO <sub>2</sub> | N <sub>2</sub> |
|-----------------------------------------------------------|-----------------|----------------|
| Henry constant [mol kg <sup>-1</sup> kPa <sup>-1</sup> ]  | 0.01382         | 0.00106        |
| Heat of adsorption at 298 K [kJ mol <sup>-1</sup> ]       | 27.4            | 15.5           |
| Accessible volume [cm <sup>3</sup> g <sup>-1</sup> ]      | –               | –              |
| Accessible surface area [m <sup>2</sup> g <sup>-1</sup> ] | –               | –              |

Table S94: Performance metrics for GIU.

| Property                                                          | Value  |
|-------------------------------------------------------------------|--------|
| Shape selectivity                                                 | 0.19   |
| Size selectivity                                                  | –      |
| Adsorption selectivity                                            | 13.02  |
| Minimum parasitic energy [kJ/kg CO <sub>2</sub> ]                 | –      |
| Purity [%] at minimum parasitic energy                            | –      |
| Cost [\$ /ton of CO <sub>2</sub> captured and compressed]         | 36.38  |
| Purity [%] at optimum cost                                        | 90.00  |
| Recovery [%] at optimum cost                                      | 90.00  |
| Energy penalty [kWh/ton CO <sub>2</sub> captured] at optimum cost | 220.15 |

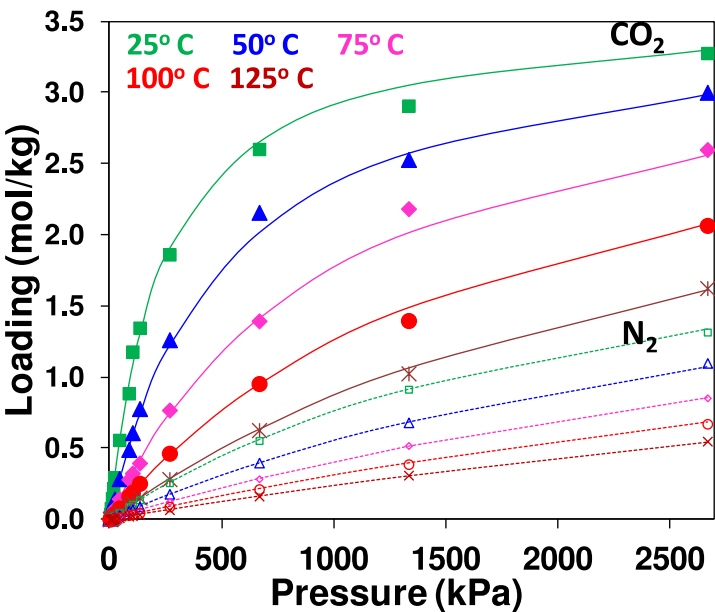

Figure S46: Adsorption isotherms of GIU. Symbols represent GCMC data, and lines represent predictions using the fitted dual-site Langmuir model (solid lines are for CO<sub>2</sub> and dashed lines are for N<sub>2</sub>).

Table S95: Dual-site Langmuir isotherm parameters for GIU.

| Parameter                                 | CO <sub>2</sub>       | N <sub>2</sub>        |
|-------------------------------------------|-----------------------|-----------------------|
| <u>Site 1</u>                             |                       |                       |
| $q^{sat}$ [mol kg <sup>-1</sup> ]         | 3.35                  | 2.50                  |
| $b^o$ [m <sup>3</sup> mol <sup>-1</sup> ] | 0                     | $1.20 \times 10^{-5}$ |
| $\Delta U$ [kJ mol <sup>-1</sup> ]        | 28.82                 | 11.17                 |
| <u>Site 2</u>                             |                       |                       |
| $q^{sat}$ [mol kg <sup>-1</sup> ]         | 3.63                  | 0                     |
| $b^o$ [m <sup>3</sup> mol <sup>-1</sup> ] | $1.00 \times 10^{-6}$ | $9.50 \times 10^{-5}$ |
| $\Delta U$ [kJ mol <sup>-1</sup> ]        | 22.45                 | 0                     |

GOO

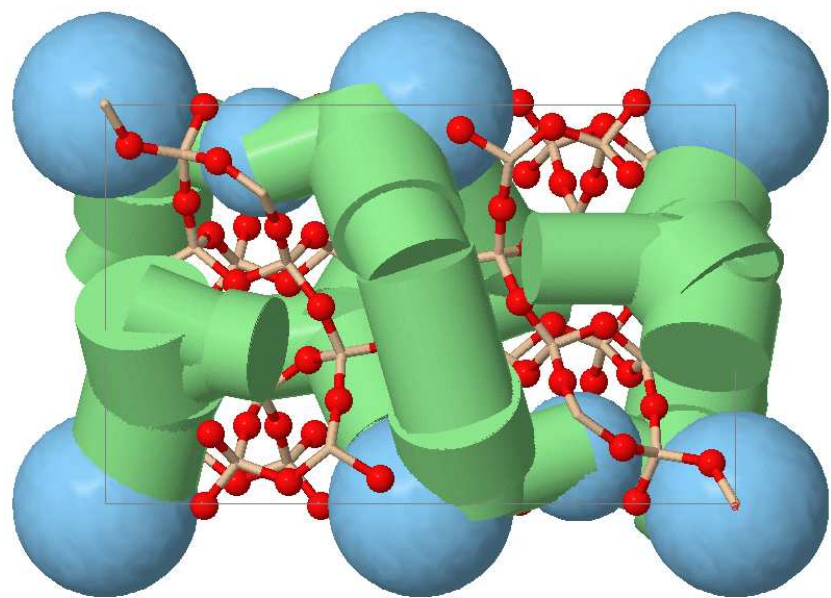

Figure S47: Main pore system of GOO from ZEOMICS. A unit cell is displayed where channels are green, cages are blue, and oxygen atoms of the zeolite structure are red.

Table S96: Physical properties for GOO.

| Property                            | Value |
|-------------------------------------|-------|
| Pore limiting diameter, PLD [Å]     | 3.6   |
| Largest cavity diameter, LCD [Å]    | 5.1   |
| Solid density [kg m <sup>-3</sup> ] | 1892  |

Table S97: Adsorption and geometric properties for GOO.

| Property                                                  | CO <sub>2</sub> | N <sub>2</sub> |
|-----------------------------------------------------------|-----------------|----------------|
| Henry constant [mol kg <sup>-1</sup> kPa <sup>-1</sup> ]  | 0.00531         | 0.00044        |
| Heat of adsorption at 298 K [kJ mol <sup>-1</sup> ]       | 28.9            | 16.7           |
| Accessible volume [cm <sup>3</sup> g <sup>-1</sup> ]      | 0.092           | 0.181          |
| Accessible surface area [m <sup>2</sup> g <sup>-1</sup> ] | 426             | 918            |



Table S98: Performance metrics for GOO.

| Property                                                          | Value   |
|-------------------------------------------------------------------|---------|
| Shape selectivity                                                 | –       |
| Size selectivity                                                  | 0.49    |
| Adsorption selectivity                                            | 12.02   |
| Minimum parasitic energy [kJ/kg CO <sub>2</sub> ]                 | 1276.35 |
| Purity [%] at minimum parasitic energy                            | 78.49   |
| Cost [\$ /ton of CO <sub>2</sub> captured and compressed]         | 32.01   |
| Purity [%] at optimum cost                                        | 90.00   |
| Recovery [%] at optimum cost                                      | 90.00   |
| Energy penalty [kWh/ton CO <sub>2</sub> captured] at optimum cost | 188.87  |

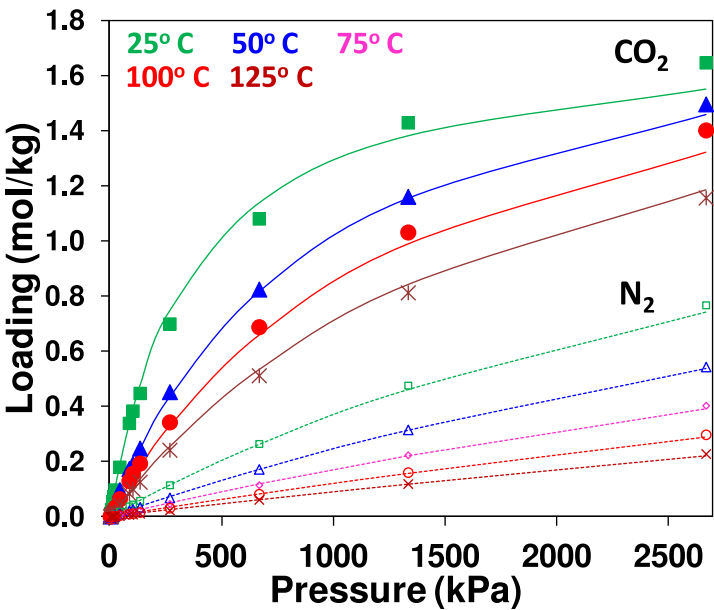

Figure S48: Adsorption isotherms of GOO. Symbols represent GCMC data, and lines represent predictions using the fitted dual-site Langmuir model (solid lines are for CO<sub>2</sub> and dashed lines are for N<sub>2</sub>).

Table S99: Dual-site Langmuir isotherm parameters for GOO.

| Parameter                                 | CO <sub>2</sub>       | N <sub>2</sub>        |
|-------------------------------------------|-----------------------|-----------------------|
| <u>Site 1</u>                             |                       |                       |
| $q^{sat}$ [mol kg <sup>-1</sup> ]         | 1.98                  | 1.98                  |
| $b^o$ [m <sup>3</sup> mol <sup>-1</sup> ] | $2.70 \times 10^{-7}$ | $3.00 \times 10^{-6}$ |
| $\Delta U$ [kJ mol <sup>-1</sup> ]        | 10.67                 | 12.84                 |
| <u>Site 2</u>                             |                       |                       |
| $q^{sat}$ [mol kg <sup>-1</sup> ]         | 1.98                  | 0                     |
| $b^o$ [m <sup>3</sup> mol <sup>-1</sup> ] | $4.80 \times 10^{-5}$ | 0                     |
| $\Delta U$ [kJ mol <sup>-1</sup> ]        | 11.99                 | 50.00                 |



IHW

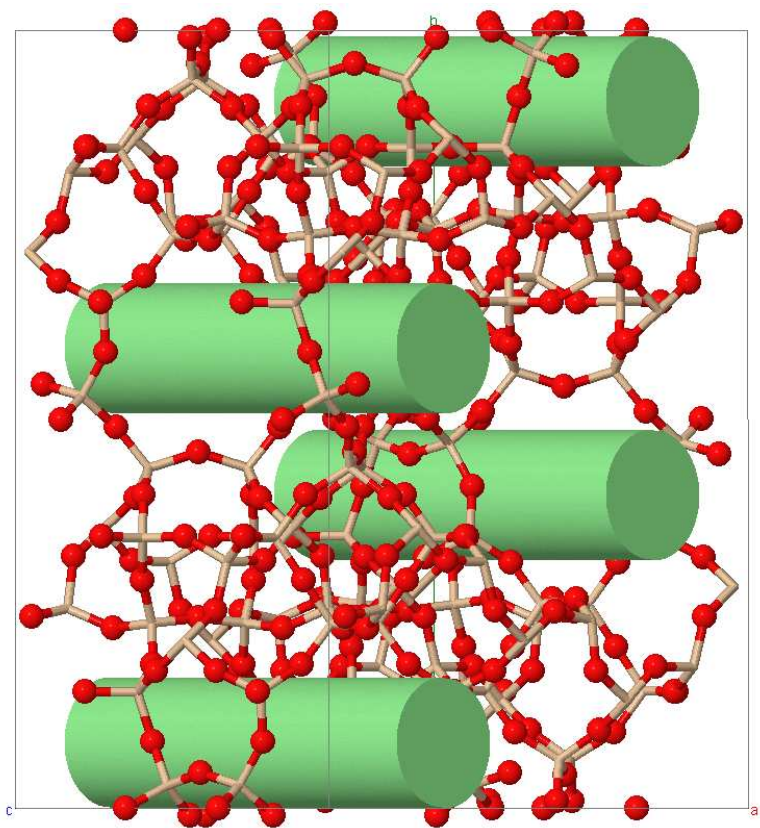

Figure S49: Main pore system of IHW from ZEOMICS. A unit cell is displayed where channels are green, cages are blue, and oxygen atoms of the zeolite structure are red.

Table S100: Physical properties for IHW.

| Property                            | Value |
|-------------------------------------|-------|
| Pore limiting diameter, PLD [Å]     | 4.0   |
| Largest cavity diameter, LCD [Å]    | 6.2   |
| Solid density [kg m <sup>-3</sup> ] | 1843  |

Table S101: Adsorption and geometric properties for IHW.

| Property                                                  | CO <sub>2</sub> | N <sub>2</sub> |
|-----------------------------------------------------------|-----------------|----------------|
| Henry constant [mol kg <sup>-1</sup> kPa <sup>-1</sup> ]  | 0.00956         | 0.00069        |
| Heat of adsorption at 298 K [kJ mol <sup>-1</sup> ]       | 26.8            | 13.0           |
| Accessible volume [cm <sup>3</sup> g <sup>-1</sup> ]      | 0.074           | 0.156          |
| Accessible surface area [m <sup>2</sup> g <sup>-1</sup> ] | 620             | 1174           |

Table S102: Performance metrics for IHW.

| Property                                                          | Value   |
|-------------------------------------------------------------------|---------|
| Shape selectivity                                                 | –       |
| Size selectivity                                                  | 0.52    |
| Adsorption selectivity                                            | 13.94   |
| Minimum parasitic energy [kJ/kg CO <sub>2</sub> ]                 | 1995.29 |
| Purity [%] at minimum parasitic energy                            | 57.23   |
| Cost [\$ /ton of CO <sub>2</sub> captured and compressed]         | 31.26   |
| Purity [%] at optimum cost                                        | 90.00   |
| Recovery [%] at optimum cost                                      | 90.00   |
| Energy penalty [kWh/ton CO <sub>2</sub> captured] at optimum cost | 188.95  |

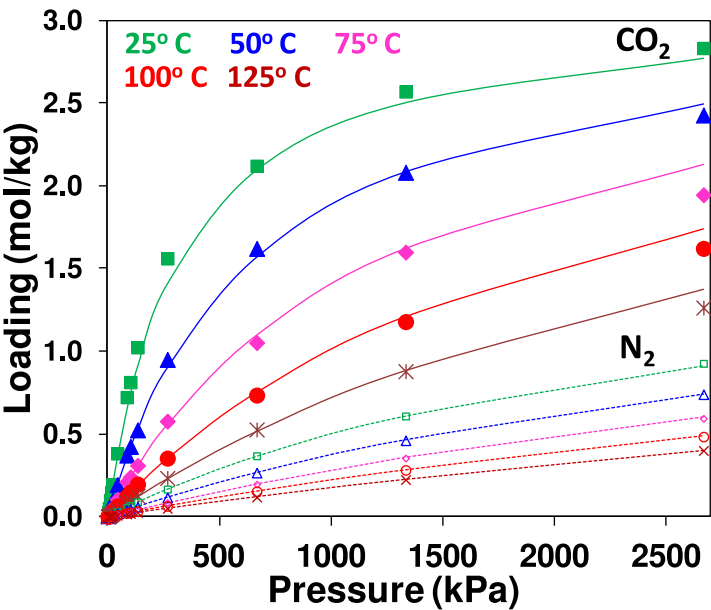

Figure S50: Adsorption isotherms of IHW. Symbols represent GCMC data, and lines represent predictions using the fitted dual-site Langmuir model (solid lines are for CO<sub>2</sub> and dashed lines are for N<sub>2</sub>).

Table S103: Dual-site Langmuir isotherm parameters for IHW.

| Parameter                                 | CO <sub>2</sub>       | N <sub>2</sub>        |
|-------------------------------------------|-----------------------|-----------------------|
| <u>Site 1</u>                             |                       |                       |
| $q^{sat}$ [mol kg <sup>-1</sup> ]         | 3.40                  | 1.83                  |
| $b^o$ [m <sup>3</sup> mol <sup>-1</sup> ] | 0                     | $1.90 \times 10^{-5}$ |
| $\Delta U$ [kJ mol <sup>-1</sup> ]        | 2.05                  | 9.61                  |
| <u>Site 2</u>                             |                       |                       |
| $q^{sat}$ [mol kg <sup>-1</sup> ]         | 3.10                  | 0.06                  |
| $b^o$ [m <sup>3</sup> mol <sup>-1</sup> ] | $2.00 \times 10^{-6}$ | 0                     |
| $\Delta U$ [kJ mol <sup>-1</sup> ]        | 20.30                 | 50.00                 |

ITR

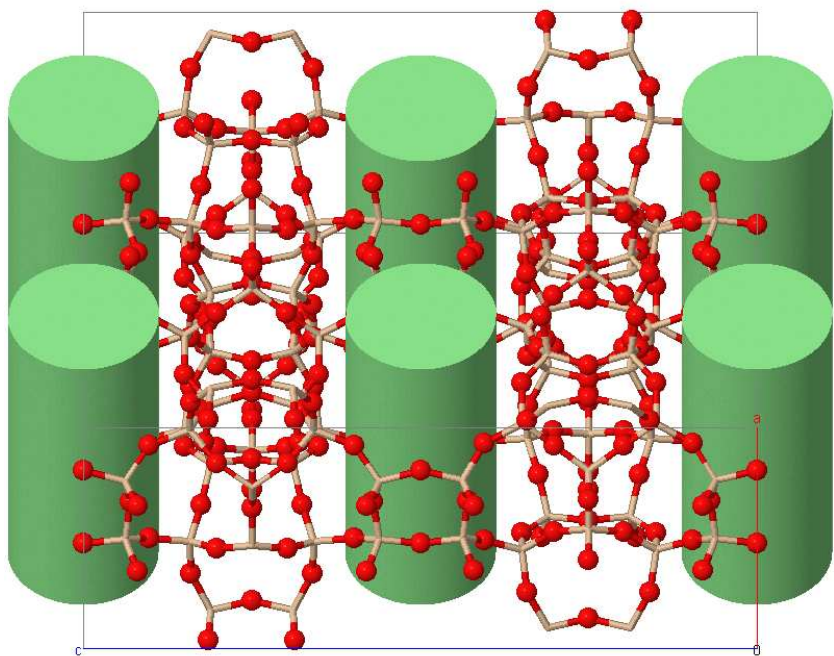

Figure S51: Main pore system of ITR from ZEOMICS. A unit cell is displayed where channels are green, cages are blue, and oxygen atoms of the zeolite structure are red.

Table S104: Physical properties for ITR.

| Property                            | Value |
|-------------------------------------|-------|
| Pore limiting diameter, PLD [Å]     | 5.6   |
| Largest cavity diameter, LCD [Å]    | 6.5   |
| Solid density [kg m <sup>-3</sup> ] | 1731  |

Table S105: Adsorption and geometric properties for ITR.

| Property                                                  | CO <sub>2</sub> | N <sub>2</sub> |
|-----------------------------------------------------------|-----------------|----------------|
| Henry constant [mol kg <sup>-1</sup> kPa <sup>-1</sup> ]  | 0.00844         | 0.00066        |
| Heat of adsorption at 298 K [kJ mol <sup>-1</sup> ]       | 24.8            | 12.9           |
| Accessible volume [cm <sup>3</sup> g <sup>-1</sup> ]      | 0.167           | 0.206          |
| Accessible surface area [m <sup>2</sup> g <sup>-1</sup> ] | 1678            | 2016           |

Table S106: Performance metrics for ITR.

| Property                                                          | Value   |
|-------------------------------------------------------------------|---------|
| Shape selectivity                                                 | –       |
| Size selectivity                                                  | 0.19    |
| Adsorption selectivity                                            | 12.84   |
| Minimum parasitic energy [kJ/kg CO <sub>2</sub> ]                 | 1936.74 |
| Purity [%] at minimum parasitic energy                            | 56.76   |
| Cost [\$ /ton of CO <sub>2</sub> captured and compressed]         | 37.92   |
| Purity [%] at optimum cost                                        | 90.18   |
| Recovery [%] at optimum cost                                      | 85.40   |
| Energy penalty [kWh/ton CO <sub>2</sub> captured] at optimum cost | 217.79  |

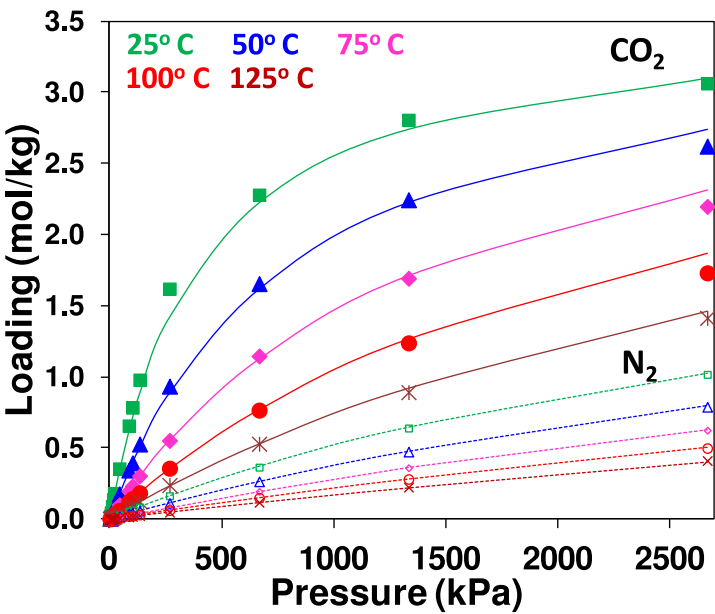

Figure S52: Adsorption isotherms of ITR. Symbols represent GCMC data, and lines represent predictions using the fitted dual-site Langmuir model (solid lines are for CO<sub>2</sub> and dashed lines are for N<sub>2</sub>).

Table S107: Dual-site Langmuir isotherm parameters for ITR.

| Parameter                                 | CO <sub>2</sub>       | N <sub>2</sub>        |
|-------------------------------------------|-----------------------|-----------------------|
| <u>Site 1</u>                             |                       |                       |
| $q^{sat}$ [mol kg <sup>-1</sup> ]         | 3.66                  | 2.49                  |
| $b^o$ [m <sup>3</sup> mol <sup>-1</sup> ] | 0                     | $1.20 \times 10^{-5}$ |
| $\Delta U$ [kJ mol <sup>-1</sup> ]        | 17.34                 | 9.89                  |
| <u>Site 2</u>                             |                       |                       |
| $q^{sat}$ [mol kg <sup>-1</sup> ]         | 3.57                  | 0                     |
| $b^o$ [m <sup>3</sup> mol <sup>-1</sup> ] | $2.00 \times 10^{-6}$ | 0                     |
| $\Delta U$ [kJ mol <sup>-1</sup> ]        | 19.36                 | 50.00                 |

ITW

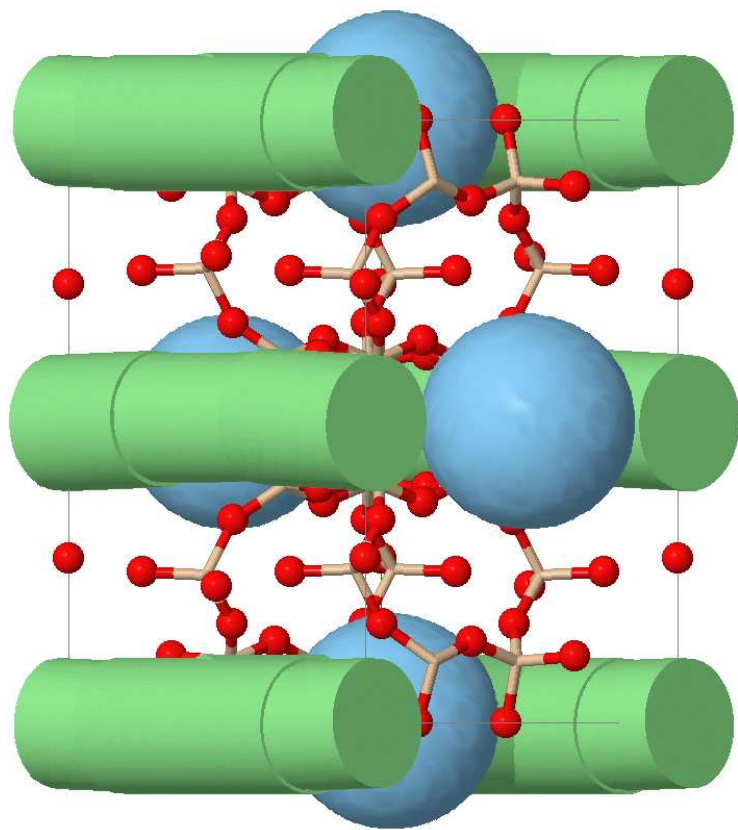

Figure S53: Main pore system of ITW from ZEOMICS. A unit cell is displayed where channels are green, cages are blue, and oxygen atoms of the zeolite structure are red.

Table S108: Physical properties for ITW.

| Property                            | Value |
|-------------------------------------|-------|
| Pore limiting diameter, PLD [Å]     | 3.4   |
| Largest cavity diameter, LCD [Å]    | 5.4   |
| Solid density [kg m <sup>-3</sup> ] | 1768  |

Table S109: Adsorption and geometric properties for ITW.

| Property                                                  | CO <sub>2</sub> | N <sub>2</sub> |
|-----------------------------------------------------------|-----------------|----------------|
| Henry constant [mol kg <sup>-1</sup> kPa <sup>-1</sup> ]  | 0.03854         | 0.00099        |
| Heat of adsorption at 298 K [kJ mol <sup>-1</sup> ]       | 30.5            | 15.2           |
| Accessible volume [cm <sup>3</sup> g <sup>-1</sup> ]      | –               | 0.311          |
| Accessible surface area [m <sup>2</sup> g <sup>-1</sup> ] | –               | 997            |

Table S110: Performance metrics for ITW.

| Property                                                          | Value   |
|-------------------------------------------------------------------|---------|
| Shape selectivity                                                 | –       |
| Size selectivity                                                  | 1.00    |
| Adsorption selectivity                                            | 39.10   |
| Minimum parasitic energy [kJ/kg CO <sub>2</sub> ]                 | 1095.99 |
| Purity [%] at minimum parasitic energy                            | 78.19   |
| Cost [\$ /ton of CO <sub>2</sub> captured and compressed]         | 29.39   |
| Purity [%] at optimum cost                                        | 90.25   |
| Recovery [%] at optimum cost                                      | 92.03   |
| Energy penalty [kWh/ton CO <sub>2</sub> captured] at optimum cost | 170.95  |

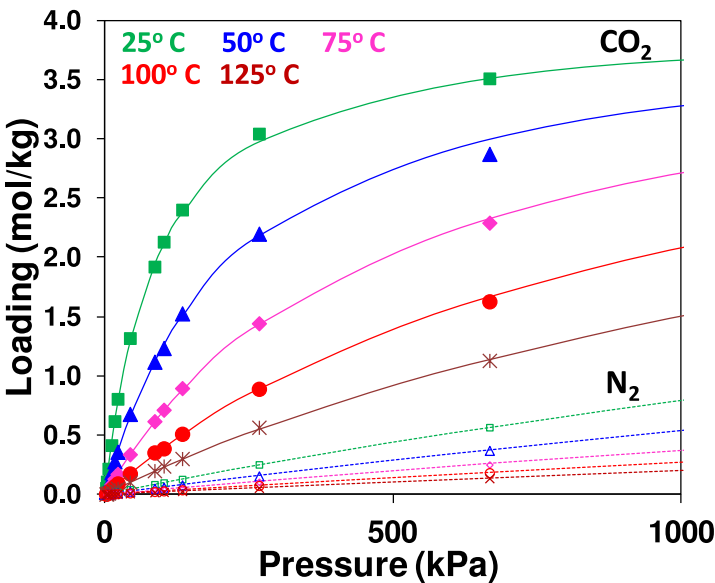

Figure S54: Adsorption isotherms of ITW. Symbols represent GCMC data, and lines represent predictions using the fitted dual-site Langmuir model (solid lines are for CO<sub>2</sub> and dashed lines are for N<sub>2</sub>).

Table S111: Dual-site Langmuir isotherm parameters for ITW.

| Parameter                                 | CO <sub>2</sub>       | N <sub>2</sub>        |
|-------------------------------------------|-----------------------|-----------------------|
| <u>Site 1</u>                             |                       |                       |
| $q^{sat}$ [mol kg <sup>-1</sup> ]         | 5.08                  | 3.75                  |
| $b^o$ [m <sup>3</sup> mol <sup>-1</sup> ] | 0                     | $4.00 \times 10^{-6}$ |
| $\Delta U$ [kJ mol <sup>-1</sup> ]        | 2.77                  | 12.47                 |
| <u>Site 2</u>                             |                       |                       |
| $q^{sat}$ [mol kg <sup>-1</sup> ]         | 3.98                  | 0                     |
| $b^o$ [m <sup>3</sup> mol <sup>-1</sup> ] | $8.10 \times 10^{-7}$ | 0                     |
| $\Delta U$ [kJ mol <sup>-1</sup> ]        | 25.83                 | 44.94                 |

**JBW**

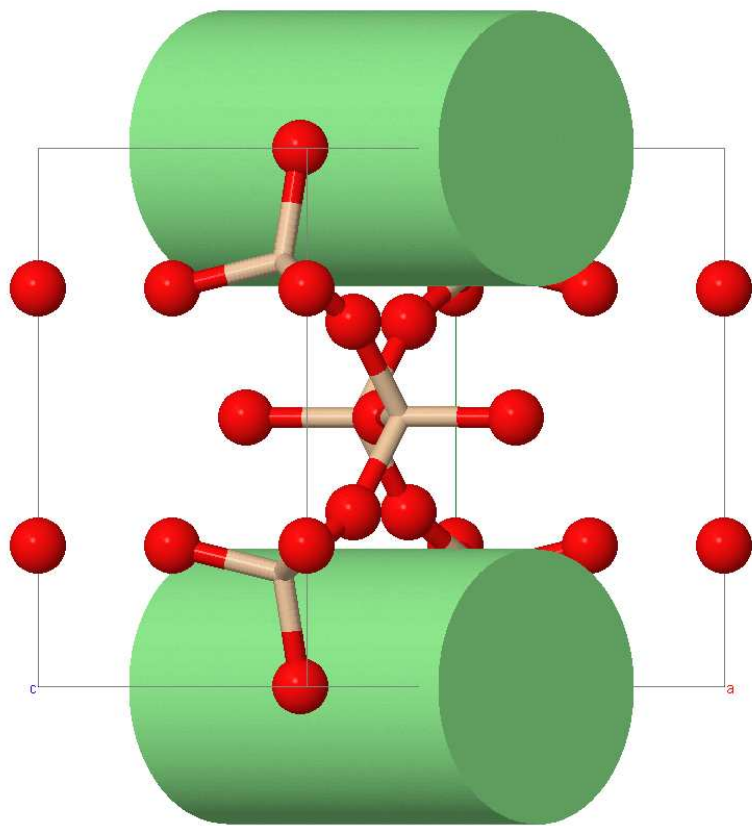

Figure S55: Main pore system of JBW from ZEOMICS. A unit cell is displayed where channels are green, cages are blue, and oxygen atoms of the zeolite structure are red.

Table S112: Physical properties for JBW.

| Property                                      | Value |
|-----------------------------------------------|-------|
| Pore limiting diameter, PLD [ $\text{\AA}$ ]  | 3.8   |
| Largest cavity diameter, LCD [ $\text{\AA}$ ] | 3.8   |
| Solid density [ $\text{kg m}^{-3}$ ]          | 1874  |

Table S113: Adsorption and geometric properties for JBW.

| Property                                                | CO <sub>2</sub> | N <sub>2</sub> |
|---------------------------------------------------------|-----------------|----------------|
| Henry constant [ $\text{mol kg}^{-1} \text{kPa}^{-1}$ ] | 0.11442         | 0.00059        |
| Heat of adsorption at 298 K [ $\text{kJ mol}^{-1}$ ]    | 38.7            | 17.5           |
| Accessible volume [ $\text{cm}^3 \text{g}^{-1}$ ]       | 0.112           | 0.112          |
| Accessible surface area [ $\text{m}^2 \text{g}^{-1}$ ]  | 834             | 834            |

Table S114: Performance metrics for JBW.

| Property                                                          | Value  |
|-------------------------------------------------------------------|--------|
| Shape selectivity                                                 | –      |
| Size selectivity                                                  | –      |
| Adsorption selectivity                                            | 194.4  |
| Minimum parasitic energy [kJ/kg CO <sub>2</sub> ]                 | 746.47 |
| Purity [%] at minimum parasitic energy                            | 95.19  |
| Cost [\$ /ton of CO <sub>2</sub> captured and compressed]         | 38.09  |
| Purity [%] at optimum cost                                        | 90.00  |
| Recovery [%] at optimum cost                                      | 90.00  |
| Energy penalty [kWh/ton CO <sub>2</sub> captured] at optimum cost | 191.43 |

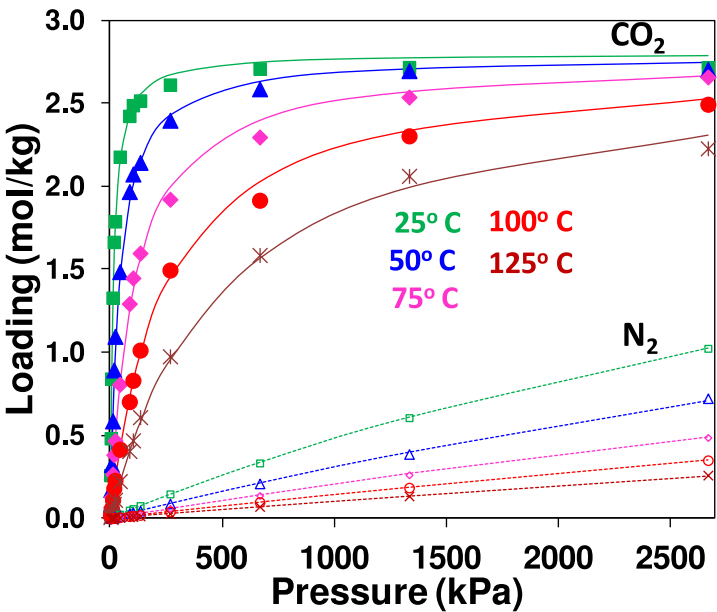

Figure S56: Adsorption isotherms of JBW. Symbols represent GCMC data, and lines represent predictions using the fitted dual-site Langmuir model (solid lines are for CO<sub>2</sub> and dashed lines are for N<sub>2</sub>).

Table S115: Dual-site Langmuir isotherm parameters for JBW.

| Parameter                                 | CO <sub>2</sub>       | N <sub>2</sub>        |
|-------------------------------------------|-----------------------|-----------------------|
| <u>Site 1</u>                             |                       |                       |
| $q^{sat}$ [mol kg <sup>-1</sup> ]         | 3.26                  | 3.26                  |
| $b^o$ [m <sup>3</sup> mol <sup>-1</sup> ] | 0                     | $2.00 \times 10^{-6}$ |
| $\Delta U$ [kJ mol <sup>-1</sup> ]        | 1.47                  | 13.76                 |
| <u>Site 2</u>                             |                       |                       |
| $q^{sat}$ [mol kg <sup>-1</sup> ]         | 3.19                  | 0                     |
| $b^o$ [m <sup>3</sup> mol <sup>-1</sup> ] | $2.30 \times 10^{-7}$ | $6.00 \times 10^{-8}$ |
| $\Delta U$ [kJ mol <sup>-1</sup> ]        | 33.50                 | 31.74                 |



LEV

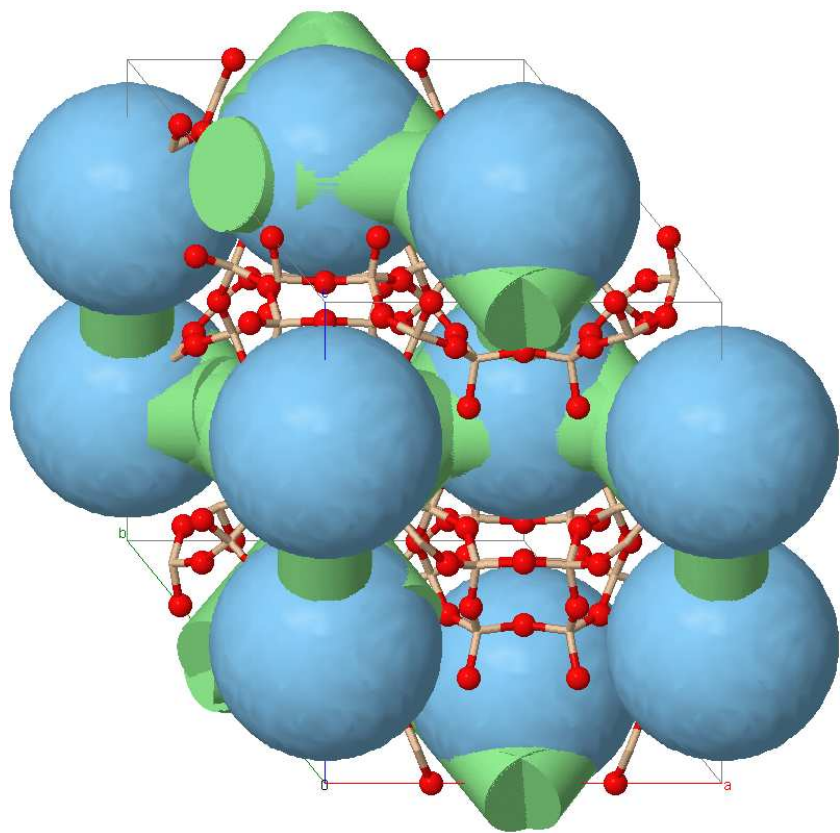

Figure S57: Main pore system of LEV from ZEOMICS. A unit cell is displayed where channels are green, cages are blue, and oxygen atoms of the zeolite structure are red.

Table S116: Physical properties for LEV.

| Property                            | Value |
|-------------------------------------|-------|
| Pore limiting diameter, PLD [Å]     | 3.4   |
| Largest cavity diameter, LCD [Å]    | 7.7   |
| Solid density [kg m <sup>-3</sup> ] | 1589  |

Table S117: Adsorption and geometric properties for LEV.

| Property                                                  | CO <sub>2</sub> | N <sub>2</sub> |
|-----------------------------------------------------------|-----------------|----------------|
| Henry constant [mol kg <sup>-1</sup> kPa <sup>-1</sup> ]  | 0.01731         | 0.00095        |
| Heat of adsorption at 298 K [kJ mol <sup>-1</sup> ]       | 28.1            | 13.4           |
| Accessible volume [cm <sup>3</sup> g <sup>-1</sup> ]      | –               | 0.356          |
| Accessible surface area [m <sup>2</sup> g <sup>-1</sup> ] | –               | 1721           |

Table S118: Performance metrics for LEV.

| Property                                                          | Value   |
|-------------------------------------------------------------------|---------|
| Shape selectivity                                                 | –       |
| Size selectivity                                                  | 1.00    |
| Adsorption selectivity                                            | 18.20   |
| Minimum parasitic energy [kJ/kg CO <sub>2</sub> ]                 | 1471.22 |
| Purity [%] at minimum parasitic energy                            | 63.65   |
| Cost [\$ /ton of CO <sub>2</sub> captured and compressed]         | 35.08   |
| Purity [%] at optimum cost                                        | 90.00   |
| Recovery [%] at optimum cost                                      | 91.41   |
| Energy penalty [kWh/ton CO <sub>2</sub> captured] at optimum cost | 207.65  |

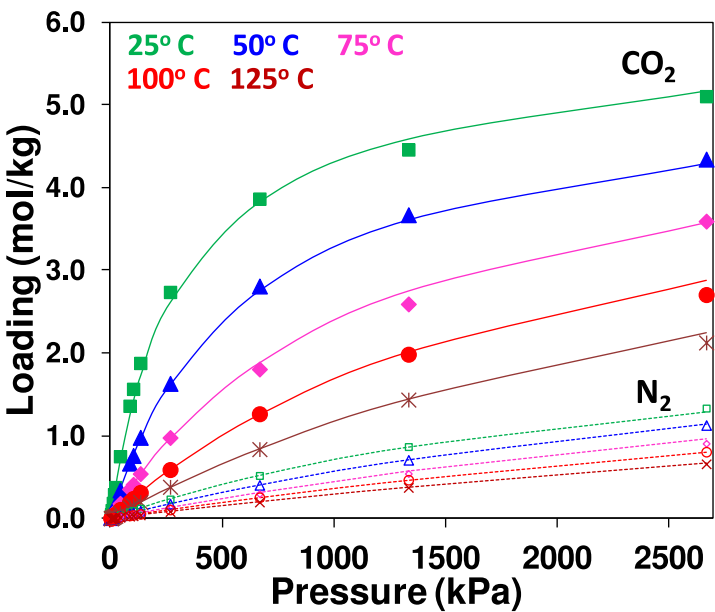

Figure S58: Adsorption isotherms of LEV. Symbols represent GCMC data, and lines represent predictions using the fitted dual-site Langmuir model (solid lines are for CO<sub>2</sub> and dashed lines are for N<sub>2</sub>).

Table S119: Dual-site Langmuir isotherm parameters for LEV.

| Parameter                                 | CO <sub>2</sub>       | N <sub>2</sub>        |
|-------------------------------------------|-----------------------|-----------------------|
| <u>Site 1</u>                             |                       |                       |
| $q^{sat}$ [mol kg <sup>-1</sup> ]         | 6.13                  | 3.13                  |
| $b^o$ [m <sup>3</sup> mol <sup>-1</sup> ] | 0                     | $2.90 \times 10^{-5}$ |
| $\Delta U$ [kJ mol <sup>-1</sup> ]        | 50.00                 | 8.07                  |
| <u>Site 2</u>                             |                       |                       |
| $q^{sat}$ [mol kg <sup>-1</sup> ]         | 5.04                  | 0                     |
| $b^o$ [m <sup>3</sup> mol <sup>-1</sup> ] | $1.00 \times 10^{-6}$ | 0                     |
| $\Delta U$ [kJ mol <sup>-1</sup> ]        | 22.02                 | 48.71                 |

LOS

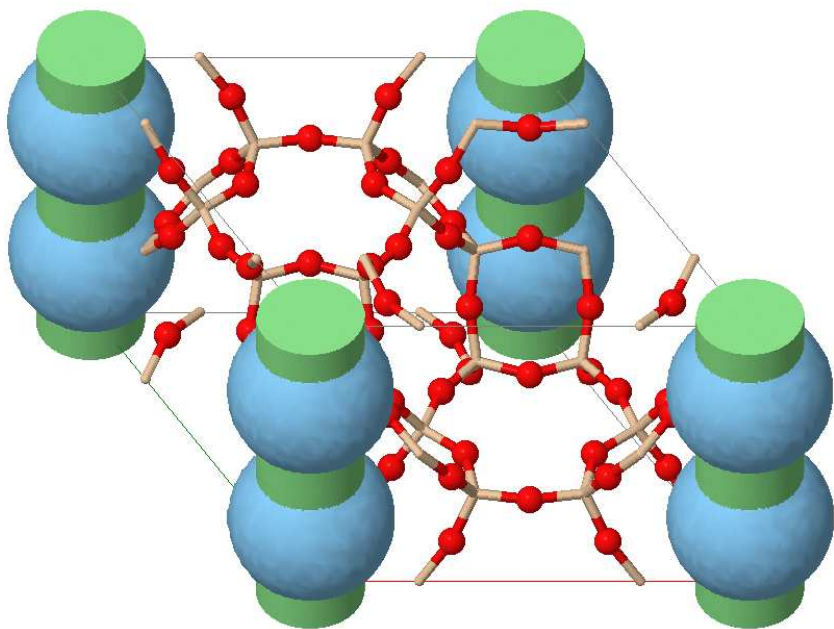

Figure S59: Main pore system of LOS from ZEOMICS. A unit cell is displayed where channels are green, cages are blue, and oxygen atoms of the zeolite structure are red.

Table S120: Physical properties for LOS.

| Property                            | Value |
|-------------------------------------|-------|
| Pore limiting diameter, PLD [Å]     | 3.1   |
| Largest cavity diameter, LCD [Å]    | 7.0   |
| Solid density [kg m <sup>-3</sup> ] | 1682  |

Table S121: Adsorption and geometric properties for LOS.

| Property                                                  | CO <sub>2</sub> | N <sub>2</sub> |
|-----------------------------------------------------------|-----------------|----------------|
| Henry constant [mol kg <sup>-1</sup> kPa <sup>-1</sup> ]  | 0.07158         | 0.00138        |
| Heat of adsorption at 298 K [kJ mol <sup>-1</sup> ]       | 31.9            | 16.8           |
| Accessible volume [cm <sup>3</sup> g <sup>-1</sup> ]      | –               | –              |
| Accessible surface area [m <sup>2</sup> g <sup>-1</sup> ] | –               | –              |

Table S122: Performance metrics for LOS.

| Property                                                          | Value  |
|-------------------------------------------------------------------|--------|
| Shape selectivity                                                 | 0.38   |
| Size selectivity                                                  | –      |
| Adsorption selectivity                                            | 51.69  |
| Minimum parasitic energy [kJ/kg CO <sub>2</sub> ]                 | –      |
| Purity [%] at minimum parasitic energy                            | –      |
| Cost [\$ /ton of CO <sub>2</sub> captured and compressed]         | 36.96  |
| Purity [%] at optimum cost                                        | 90.19  |
| Recovery [%] at optimum cost                                      | 91.00  |
| Energy penalty [kWh/ton CO <sub>2</sub> captured] at optimum cost | 261.26 |

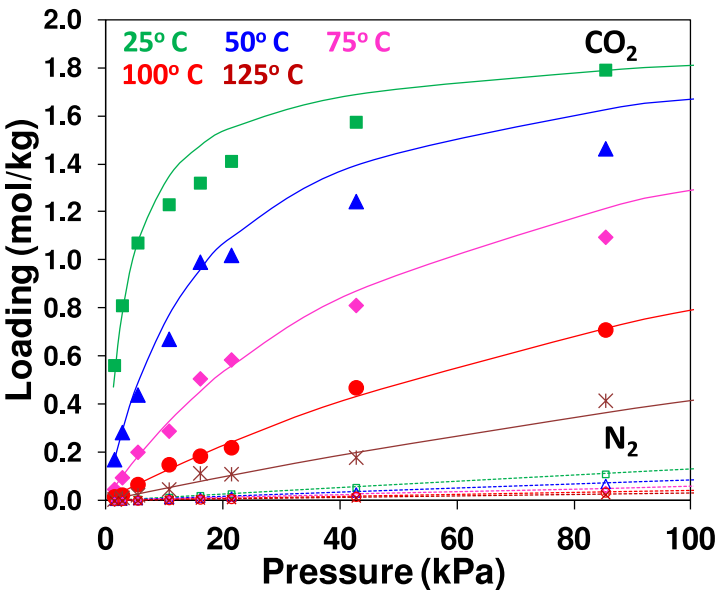

Figure S60: Adsorption isotherms of LOS. Symbols represent GCMC data, and lines represent predictions using the fitted dual-site Langmuir model (solid lines are for CO<sub>2</sub> and dashed lines are for N<sub>2</sub>).

Table S123: Dual-site Langmuir isotherm parameters for LOS.

| Parameter                                 | CO <sub>2</sub>       | N <sub>2</sub>        |
|-------------------------------------------|-----------------------|-----------------------|
| <u>Site 1</u>                             |                       |                       |
| $q^{sat}$ [mol kg <sup>-1</sup> ]         | 3.36                  | 3.36                  |
| $b^o$ [m <sup>3</sup> mol <sup>-1</sup> ] | $1.00 \times 10^{-6}$ | $8.00 \times 10^{-6}$ |
| $\Delta U$ [kJ mol <sup>-1</sup> ]        | 15.38                 | 12.04                 |
| <u>Site 2</u>                             |                       |                       |
| $q^{sat}$ [mol kg <sup>-1</sup> ]         | 3.36                  | 0                     |
| $b^o$ [m <sup>3</sup> mol <sup>-1</sup> ] | $1.00 \times 10^{-8}$ | 0                     |
| $\Delta U$ [kJ mol <sup>-1</sup> ]        | 42.17                 | 45.23                 |

LTA

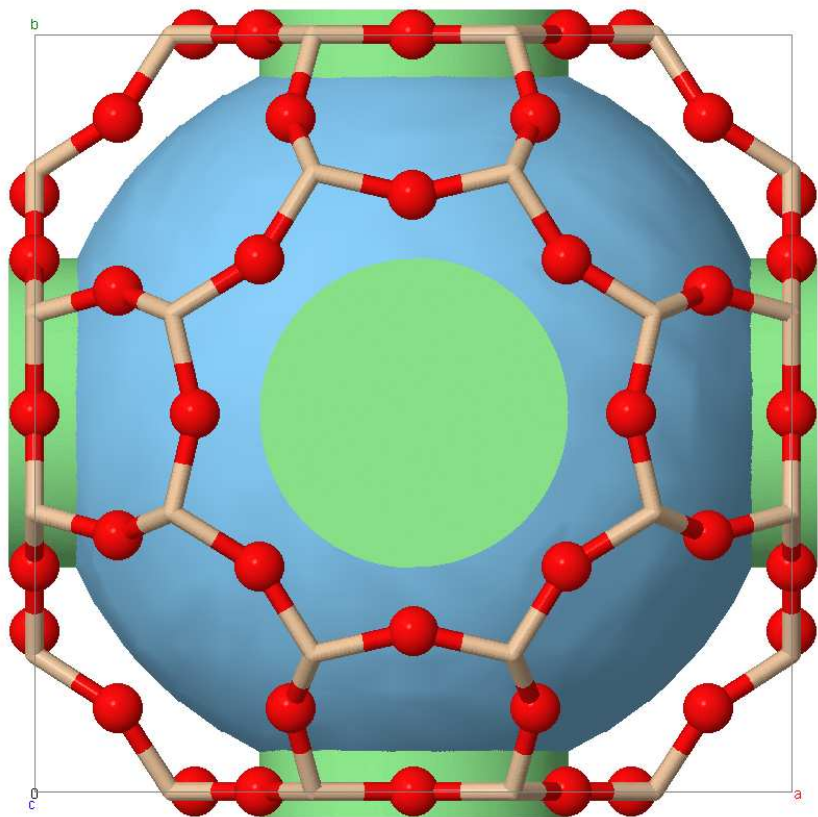

Figure S61: Main pore system of LTA from ZEOMICS. A unit cell is displayed where channels are green, cages are blue, and oxygen atoms of the zeolite structure are red.

Table S124: Physical properties for LTA.

| Property                            | Value |
|-------------------------------------|-------|
| Pore limiting diameter, PLD [Å]     | 4.9   |
| Largest cavity diameter, LCD [Å]    | 11.7  |
| Solid density [kg m <sup>-3</sup> ] | 1414  |

Table S125: Adsorption and geometric properties for LTA.

| Property                                                  | CO <sub>2</sub> | N <sub>2</sub> |
|-----------------------------------------------------------|-----------------|----------------|
| Henry constant [mol kg <sup>-1</sup> kPa <sup>-1</sup> ]  | 0.00716         | 0.00093        |
| Heat of adsorption at 298 K [kJ mol <sup>-1</sup> ]       | 24.3            | 11.5           |
| Accessible volume [cm <sup>3</sup> g <sup>-1</sup> ]      | 0.369           | 0.369          |
| Accessible surface area [m <sup>2</sup> g <sup>-1</sup> ] | 1198            | 1198           |

Table S126: Performance metrics for LTA.

| Property                                                          | Value   |
|-------------------------------------------------------------------|---------|
| Shape selectivity                                                 | –       |
| Size selectivity                                                  | –       |
| Adsorption selectivity                                            | 7.69    |
| Minimum parasitic energy [kJ/kg CO <sub>2</sub> ]                 | 2464.34 |
| Purity [%] at minimum parasitic energy                            | 47.52   |
| Cost [\$ /ton of CO <sub>2</sub> captured and compressed]         | 41.53   |
| Purity [%] at optimum cost                                        | 90.00   |
| Recovery [%] at optimum cost                                      | 77.66   |
| Energy penalty [kWh/ton CO <sub>2</sub> captured] at optimum cost | 235.30  |

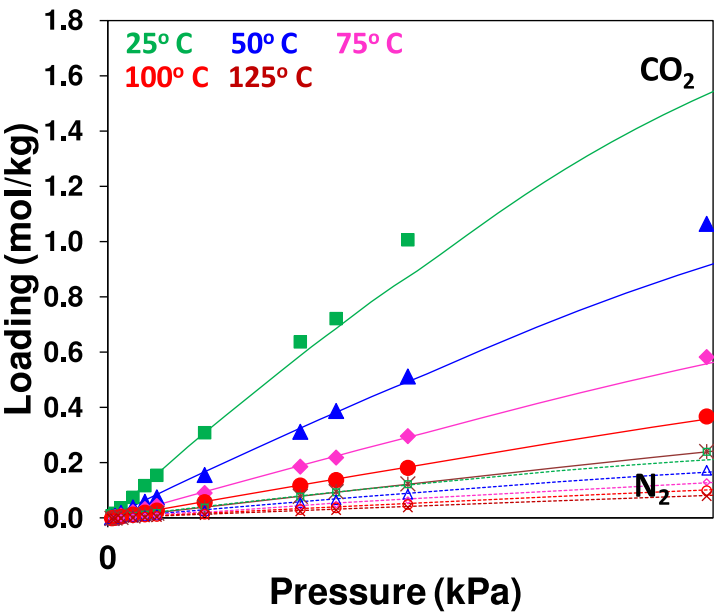

Figure S62: Adsorption isotherms of LTA. Symbols represent GCMC data, and lines represent predictions using the fitted dual-site Langmuir model (solid lines are for CO<sub>2</sub> and dashed lines are for N<sub>2</sub>).

Table S127: Dual-site Langmuir isotherm parameters for LTA.

| Parameter                                 | CO <sub>2</sub>       | N <sub>2</sub>        |
|-------------------------------------------|-----------------------|-----------------------|
| <u>Site 1</u>                             |                       |                       |
| $q^{sat}$ [mol kg <sup>-1</sup> ]         | 7.20                  | 7.20                  |
| $b^o$ [m <sup>3</sup> mol <sup>-1</sup> ] | $2.00 \times 10^{-6}$ | $1.00 \times 10^{-5}$ |
| $\Delta U$ [kJ mol <sup>-1</sup> ]        | 17.72                 | 8.82                  |
| <u>Site 2</u>                             |                       |                       |
| $q^{sat}$ [mol kg <sup>-1</sup> ]         | 0                     | 0                     |
| $b^o$ [m <sup>3</sup> mol <sup>-1</sup> ] | 0                     | 0                     |
| $\Delta U$ [kJ mol <sup>-1</sup> ]        | 24.46                 | 10.95                 |

**LTF**

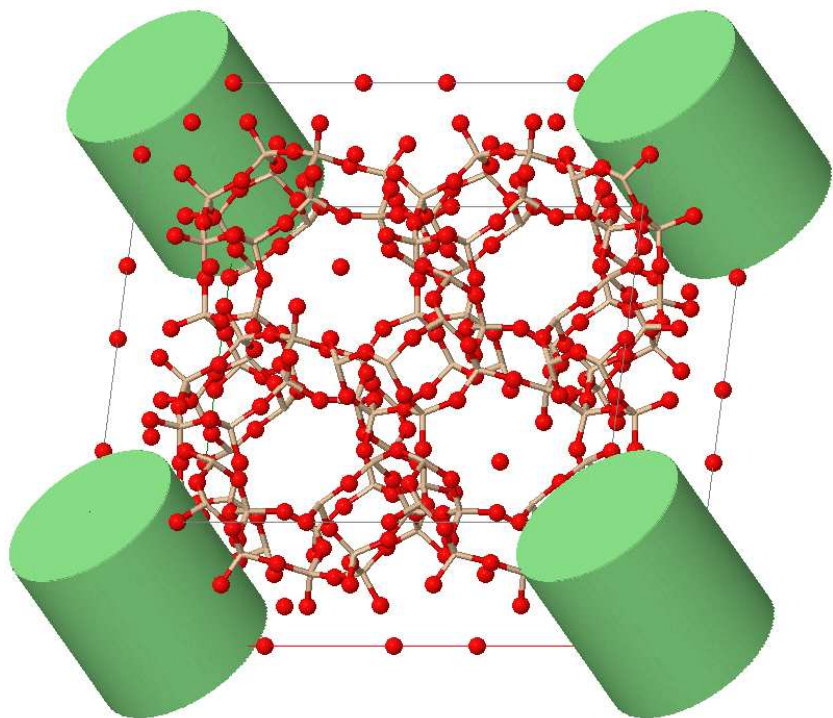

Figure S63: Main pore system of LTF from ZEOMICS. A unit cell is displayed where channels are green, cages are blue, and oxygen atoms of the zeolite structure are red.

Table S128: Physical properties for LTF.

| Property                            | Value |
|-------------------------------------|-------|
| Pore limiting diameter, PLD [Å]     | 8.1   |
| Largest cavity diameter, LCD [Å]    | 8.1   |
| Solid density [kg m <sup>-3</sup> ] | 1685  |

Table S129: Adsorption and geometric properties for LTF.

| Property                                                  | CO <sub>2</sub> | N <sub>2</sub> |
|-----------------------------------------------------------|-----------------|----------------|
| Henry constant [mol kg <sup>-1</sup> kPa <sup>-1</sup> ]  | 0.01941         | 0.00089        |
| Heat of adsorption at 298 K [kJ mol <sup>-1</sup> ]       | 29.3            | 14.5           |
| Accessible volume [cm <sup>3</sup> g <sup>-1</sup> ]      | 0.251           | 0.305          |
| Accessible surface area [m <sup>2</sup> g <sup>-1</sup> ] | 1225            | 1839           |



Table S130: Performance metrics for LTF.

| Property                                                          | Value   |
|-------------------------------------------------------------------|---------|
| Shape selectivity                                                 | –       |
| Size selectivity                                                  | 0.18    |
| Adsorption selectivity                                            | 21.89   |
| Minimum parasitic energy [kJ/kg CO <sub>2</sub> ]                 | 1370.41 |
| Purity [%] at minimum parasitic energy                            | 70.71   |
| Cost [\$ /ton of CO <sub>2</sub> captured and compressed]         | 29.59   |
| Purity [%] at optimum cost                                        | 90.05   |
| Recovery [%] at optimum cost                                      | 90.00   |
| Energy penalty [kWh/ton CO <sub>2</sub> captured] at optimum cost | 174.11  |

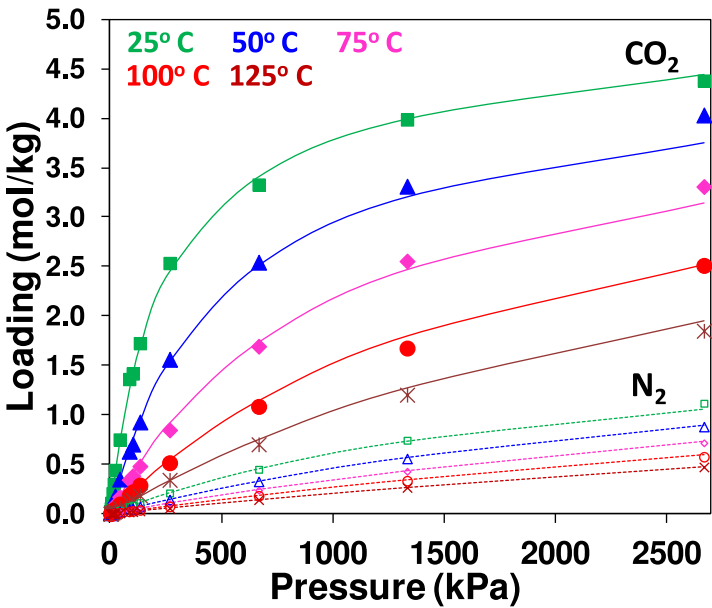

Figure S64: Adsorption isotherms of LTF. Symbols represent GCMC data, and lines represent predictions using the fitted dual-site Langmuir model (solid lines are for CO<sub>2</sub> and dashed lines are for N<sub>2</sub>).

Table S131: Dual-site Langmuir isotherm parameters for LTF.

| Parameter                                 | CO <sub>2</sub>       | N <sub>2</sub>        |
|-------------------------------------------|-----------------------|-----------------------|
| <u>Site 1</u>                             |                       |                       |
| $q^{sat}$ [mol kg <sup>-1</sup> ]         | 5.26                  | 2.43                  |
| $b^o$ [m <sup>3</sup> mol <sup>-1</sup> ] | 0                     | $1.20 \times 10^{-5}$ |
| $\Delta U$ [kJ mol <sup>-1</sup> ]        | 32.54                 | 10.72                 |
| <u>Site 2</u>                             |                       |                       |
| $q^{sat}$ [mol kg <sup>-1</sup> ]         | 4.07                  | 0.06                  |
| $b^o$ [m <sup>3</sup> mol <sup>-1</sup> ] | $8.40 \times 10^{-7}$ | 0                     |
| $\Delta U$ [kJ mol <sup>-1</sup> ]        | 23.76                 | 43.24                 |



MAR

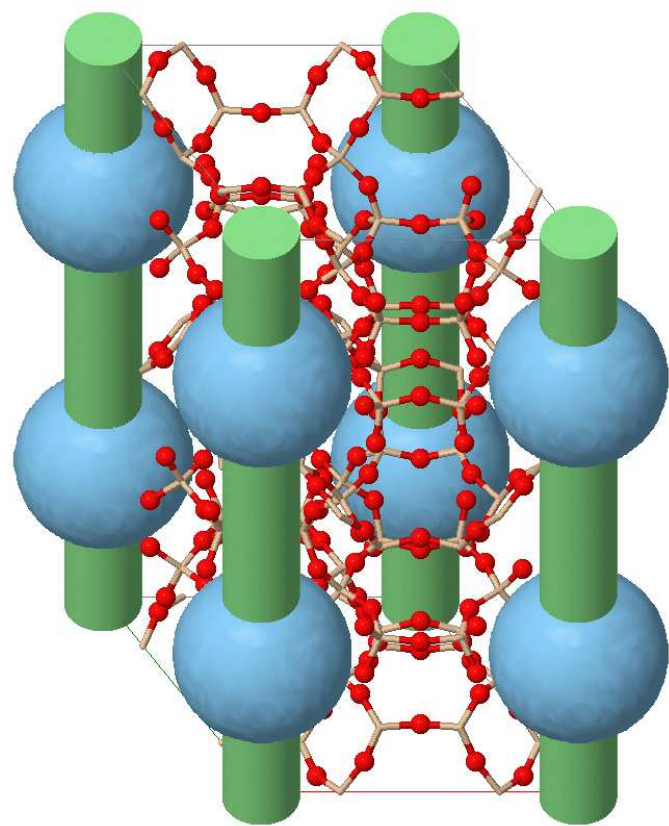

Figure S65: Main pore system of MAR from ZEOMICS. A unit cell is displayed where channels are green, cages are blue, and oxygen atoms of the zeolite structure are red.

Table S132: Physical properties for MAR.

| Property                            | Value |
|-------------------------------------|-------|
| Pore limiting diameter, PLD [Å]     | 3.0   |
| Largest cavity diameter, LCD [Å]    | 7.0   |
| Solid density [kg m <sup>-3</sup> ] | 1773  |

Table S133: Adsorption and geometric properties for MAR.

| Property                                                  | CO <sub>2</sub> | N <sub>2</sub> |
|-----------------------------------------------------------|-----------------|----------------|
| Henry constant [mol kg <sup>-1</sup> kPa <sup>-1</sup> ]  | 0.00725         | 0.00134        |
| Heat of adsorption at 298 K [kJ mol <sup>-1</sup> ]       | 28.6            | 17.1           |
| Accessible volume [cm <sup>3</sup> g <sup>-1</sup> ]      | –               | –              |
| Accessible surface area [m <sup>2</sup> g <sup>-1</sup> ] | –               | –              |

Table S134: Performance metrics for MAR.

| Property                                                          | Value  |
|-------------------------------------------------------------------|--------|
| Shape selectivity                                                 | 0.44   |
| Size selectivity                                                  | –      |
| Adsorption selectivity                                            | 5.40   |
| Minimum parasitic energy [kJ/kg CO <sub>2</sub> ]                 | –      |
| Purity [%] at minimum parasitic energy                            | –      |
| Cost [\$ /ton of CO <sub>2</sub> captured and compressed]         | 52.70  |
| Purity [%] at optimum cost                                        | 86.53  |
| Recovery [%] at optimum cost                                      | 36.87  |
| Energy penalty [kWh/ton CO <sub>2</sub> captured] at optimum cost | 420.94 |

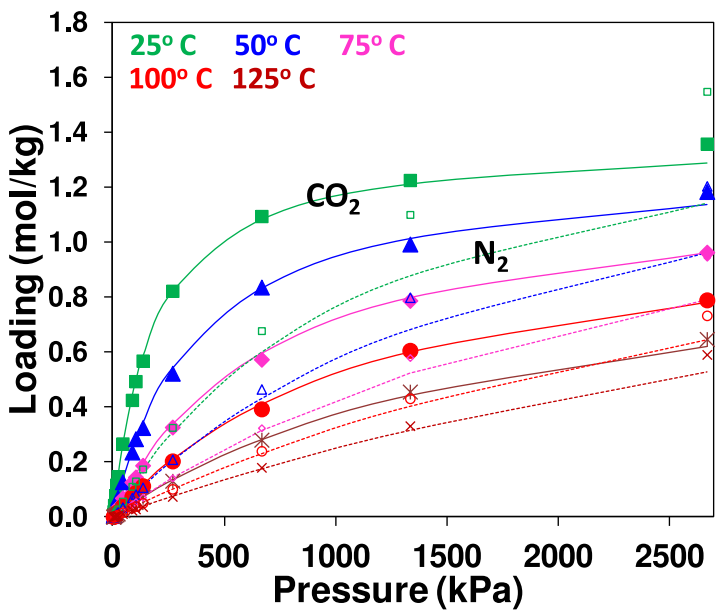

Figure S66: Adsorption isotherms of MAR. Symbols represent GCMC data, and lines represent predictions using the fitted dual-site Langmuir model (solid lines are for CO<sub>2</sub> and dashed lines are for N<sub>2</sub>).

Table S135: Dual-site Langmuir isotherm parameters for MAR.

| Parameter                                 | CO <sub>2</sub>       | N <sub>2</sub>        |
|-------------------------------------------|-----------------------|-----------------------|
| <u>Site 1</u>                             |                       |                       |
| $q^{sat}$ [mol kg <sup>-1</sup> ]         | 1.20                  | 1.63                  |
| $b^o$ [m <sup>3</sup> mol <sup>-1</sup> ] | 0                     | $1.20 \times 10^{-5}$ |
| $\Delta U$ [kJ mol <sup>-1</sup> ]        | 0.60                  | 12.78                 |
| <u>Site 2</u>                             |                       |                       |
| $q^{sat}$ [mol kg <sup>-1</sup> ]         | 1.63                  | 0                     |
| $b^o$ [m <sup>3</sup> mol <sup>-1</sup> ] | $1.00 \times 10^{-6}$ | $2.10 \times 10^{-5}$ |
| $\Delta U$ [kJ mol <sup>-1</sup> ]        | 22.62                 | 11.47                 |

MEL

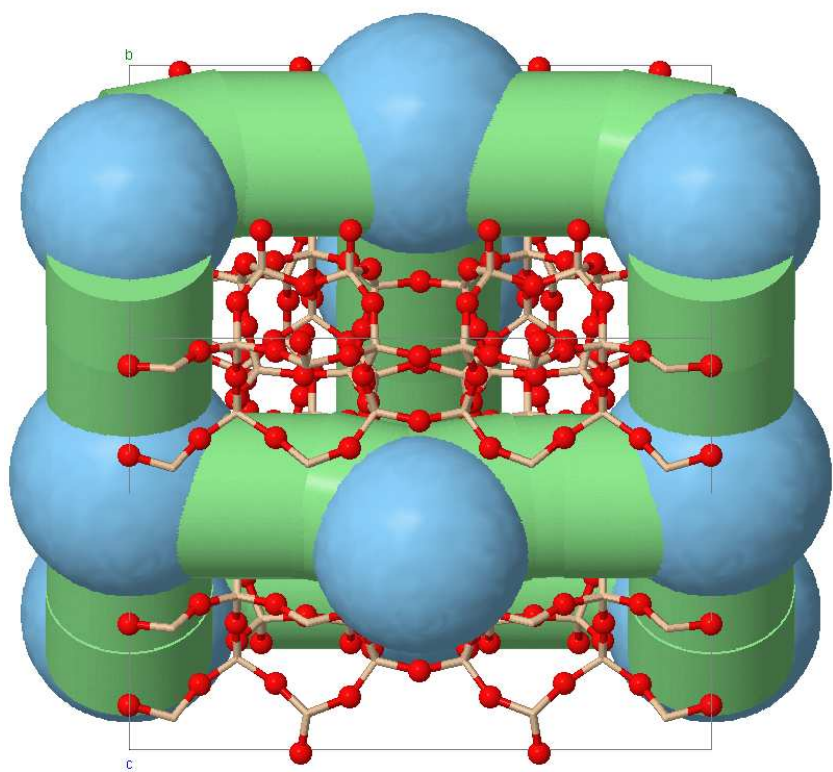

Figure S67: Main pore system of MEL from ZEOMICS. A unit cell is displayed where channels are green, cages are blue, and oxygen atoms of the zeolite structure are red.

Table S136: Physical properties for MEL.

| Property                            | Value |
|-------------------------------------|-------|
| Pore limiting diameter, PLD [Å]     | 5.7   |
| Largest cavity diameter, LCD [Å]    | 8.4   |
| Solid density [kg m <sup>-3</sup> ] | 1732  |

Table S137: Adsorption and geometric properties for MEL.

| Property                                                  | CO <sub>2</sub> | N <sub>2</sub> |
|-----------------------------------------------------------|-----------------|----------------|
| Henry constant [mol kg <sup>-1</sup> kPa <sup>-1</sup> ]  | 0.00935         | 0.00076        |
| Heat of adsorption at 298 K [kJ mol <sup>-1</sup> ]       | 24.1            | 12.0           |
| Accessible volume [cm <sup>3</sup> g <sup>-1</sup> ]      | 0.224           | 0.224          |
| Accessible surface area [m <sup>2</sup> g <sup>-1</sup> ] | 995             | 995            |

Table S138: Performance metrics for MEL.

| Property                                                          | Value   |
|-------------------------------------------------------------------|---------|
| Shape selectivity                                                 | –       |
| Size selectivity                                                  | –       |
| Adsorption selectivity                                            | 12.31   |
| Minimum parasitic energy [kJ/kg CO <sub>2</sub> ]                 | 1948.91 |
| Purity [%] at minimum parasitic energy                            | 55.56   |
| Cost [\$ /ton of CO <sub>2</sub> captured and compressed]         | 32.83   |
| Purity [%] at optimum cost                                        | 90.00   |
| Recovery [%] at optimum cost                                      | 90.00   |
| Energy penalty [kWh/ton CO <sub>2</sub> captured] at optimum cost | 215.54  |

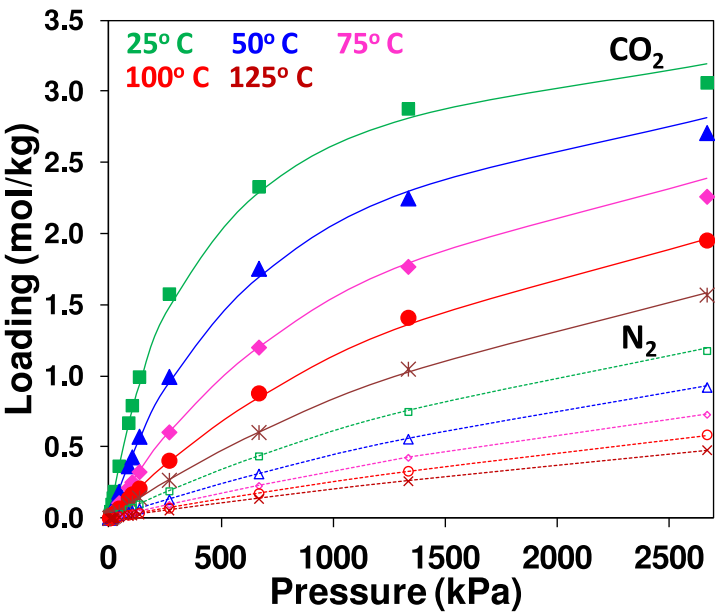

Figure S68: Adsorption isotherms of MEL. Symbols represent GCMC data, and lines represent predictions using the fitted dual-site Langmuir model (solid lines are for CO<sub>2</sub> and dashed lines are for N<sub>2</sub>).

Table S139: Dual-site Langmuir isotherm parameters for MEL.

| Parameter                                 | CO <sub>2</sub>       | N <sub>2</sub>        |
|-------------------------------------------|-----------------------|-----------------------|
| <u>Site 1</u>                             |                       |                       |
| $q^{sat}$ [mol kg <sup>-1</sup> ]         | 3.68                  | 3.12                  |
| $b^o$ [m <sup>3</sup> mol <sup>-1</sup> ] | $6.30 \times 10^{-5}$ | $1.30 \times 10^{-5}$ |
| $\Delta U$ [kJ mol <sup>-1</sup> ]        | 0                     | 9.55                  |
| <u>Site 2</u>                             |                       |                       |
| $q^{sat}$ [mol kg <sup>-1</sup> ]         | 3.68                  | 0                     |
| $b^o$ [m <sup>3</sup> mol <sup>-1</sup> ] | $3.00 \times 10^{-6}$ | $3.50 \times 10^{-5}$ |
| $\Delta U$ [kJ mol <sup>-1</sup> ]        | 18.95                 | 5.93                  |

MFI

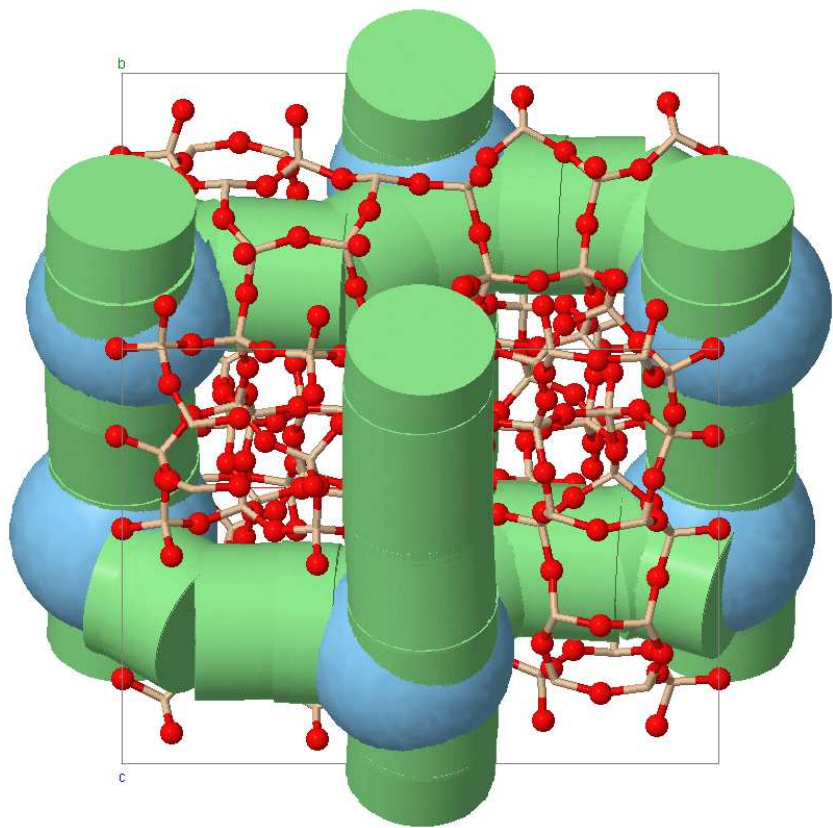

Figure S69: Main pore system of MFI from ZEOMICS. A unit cell is displayed where channels are green, cages are blue, and oxygen atoms of the zeolite structure are red.

Table S140: Physical properties for MFI.

| Property                            | Value |
|-------------------------------------|-------|
| Pore limiting diameter, PLD [Å]     | 5.0   |
| Largest cavity diameter, LCD [Å]    | 7.0   |
| Solid density [kg m <sup>-3</sup> ] | 1838  |

Table S141: Adsorption and geometric properties for MFI.

| Property                                                  | CO <sub>2</sub> | N <sub>2</sub> |
|-----------------------------------------------------------|-----------------|----------------|
| Henry constant [mol kg <sup>-1</sup> kPa <sup>-1</sup> ]  | 0.01302         | 0.00071        |
| Heat of adsorption at 298 K [kJ mol <sup>-1</sup> ]       | 26.5            | 14.4           |
| Accessible volume [cm <sup>3</sup> g <sup>-1</sup> ]      | 0.193           | 0.193          |
| Accessible surface area [m <sup>2</sup> g <sup>-1</sup> ] | 1007            | 1007           |

Table S142: Performance metrics for MFI.

| Property                                                          | Value   |
|-------------------------------------------------------------------|---------|
| Shape selectivity                                                 | –       |
| Size selectivity                                                  | –       |
| Adsorption selectivity                                            | 18.25   |
| Minimum parasitic energy [kJ/kg CO <sub>2</sub> ]                 | 1567.63 |
| Purity [%] at minimum parasitic energy                            | 65.24   |
| Cost [\$ /ton of CO <sub>2</sub> captured and compressed]         | 33.51   |
| Purity [%] at optimum cost                                        | 93.20   |
| Recovery [%] at optimum cost                                      | 92.00   |
| Energy penalty [kWh/ton CO <sub>2</sub> captured] at optimum cost | 214.06  |

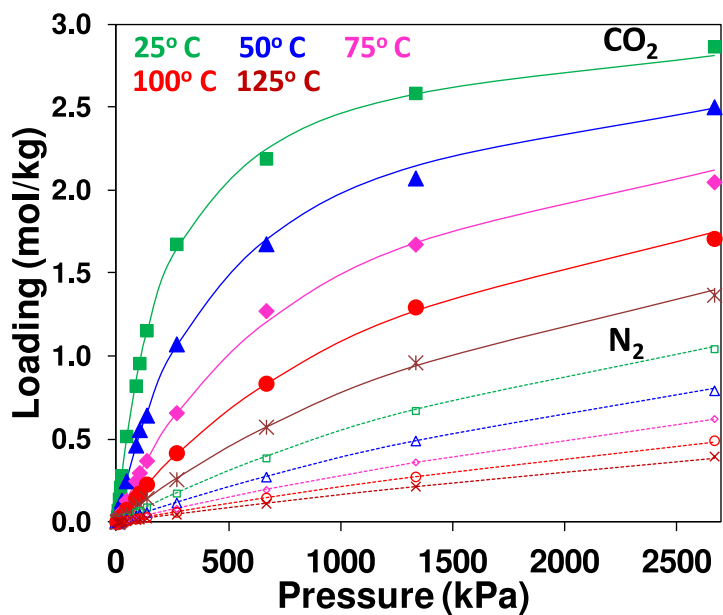

Figure S70: Adsorption isotherms of MFI. Symbols represent GCMC data, and lines represent predictions using the fitted dual-site Langmuir model (solid lines are for CO<sub>2</sub> and dashed lines are for N<sub>2</sub>).

Table S143: Dual-site Langmuir isotherm parameters for MFI.

| Parameter                                 | CO <sub>2</sub>       | N <sub>2</sub>        |
|-------------------------------------------|-----------------------|-----------------------|
| <u>Site 1</u>                             |                       |                       |
| $q^{sat}$ [mol kg <sup>-1</sup> ]         | 3.44                  | 2.65                  |
| $b^o$ [m <sup>3</sup> mol <sup>-1</sup> ] | $7.60 \times 10^{-5}$ | $9.00 \times 10^{-6}$ |
| $\Delta U$ [kJ mol <sup>-1</sup> ]        | 0                     | 10.75                 |
| <u>Site 2</u>                             |                       |                       |
| $q^{sat}$ [mol kg <sup>-1</sup> ]         | 3.44                  | 0                     |
| $b^o$ [m <sup>3</sup> mol <sup>-1</sup> ] | $9.40 \times 10^{-7}$ | $9.00 \times 10^{-6}$ |
| $\Delta U$ [kJ mol <sup>-1</sup> ]        | 22.98                 | 13.40                 |

MON

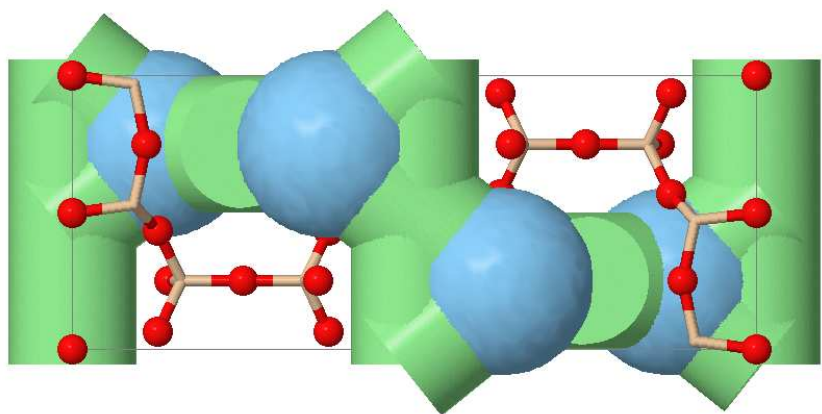

Figure S71: Main pore system of MON from ZEOMICS. A unit cell is displayed where channels are green, cages are blue, and oxygen atoms of the zeolite structure are red.

Table S144: Physical properties for MON.

| Property                            | Value |
|-------------------------------------|-------|
| Pore limiting diameter, PLD [Å]     | 3.5   |
| Largest cavity diameter, LCD [Å]    | 4.9   |
| Solid density [kg m <sup>-3</sup> ] | 1761  |

Table S145: Adsorption and geometric properties for MON.

| Property                                                  | CO <sub>2</sub> | N <sub>2</sub> |
|-----------------------------------------------------------|-----------------|----------------|
| Henry constant [mol kg <sup>-1</sup> kPa <sup>-1</sup> ]  | 0.08434         | 0.00067        |
| Heat of adsorption at 298 K [kJ mol <sup>-1</sup> ]       | 38.0            | 17.3           |
| Accessible volume [cm <sup>3</sup> g <sup>-1</sup> ]      | 0.267           | 0.318          |
| Accessible surface area [m <sup>2</sup> g <sup>-1</sup> ] | 1633            | 1633           |

Table S146: Performance metrics for MON.

| Property                                                          | Value  |
|-------------------------------------------------------------------|--------|
| Shape selectivity                                                 | –      |
| Size selectivity                                                  | 0.16   |
| Adsorption selectivity                                            | 126.5  |
| Minimum parasitic energy [kJ/kg CO <sub>2</sub> ]                 | 891.00 |
| Purity [%] at minimum parasitic energy                            | 88.92  |
| Cost [\$ /ton of CO <sub>2</sub> captured and compressed]         | 34.34  |
| Purity [%] at optimum cost                                        | 90.00  |
| Recovery [%] at optimum cost                                      | 90.00  |
| Energy penalty [kWh/ton CO <sub>2</sub> captured] at optimum cost | 202.76 |

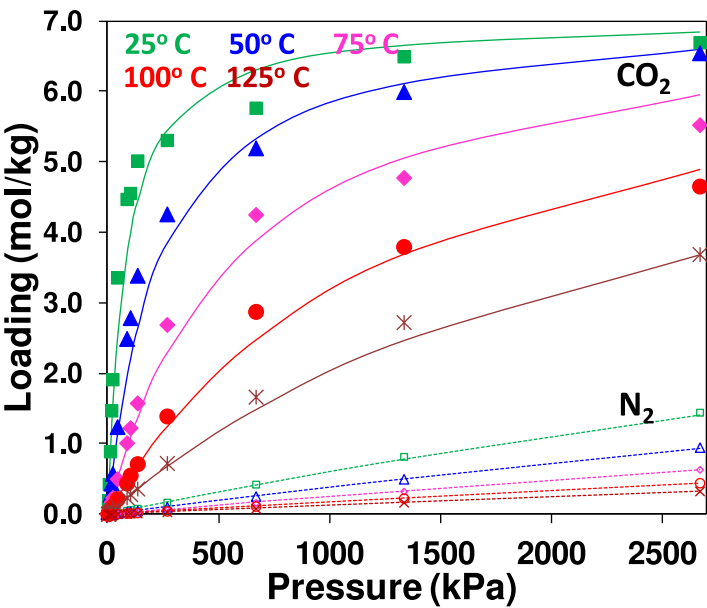

Figure S72: Adsorption isotherms of MON. Symbols represent GCMC data, and lines represent predictions using the fitted dual-site Langmuir model (solid lines are for CO<sub>2</sub> and dashed lines are for N<sub>2</sub>).

Table S147: Dual-site Langmuir isotherm parameters for MON.

| Parameter                                 | CO <sub>2</sub>       | N <sub>2</sub>        |
|-------------------------------------------|-----------------------|-----------------------|
| <u>Site 1</u>                             |                       |                       |
| $q^{sat}$ [mol kg <sup>-1</sup> ]         | 6.06                  | 7.34                  |
| $b^o$ [m <sup>3</sup> mol <sup>-1</sup> ] | 0                     | $1.00 \times 10^{-6}$ |
| $\Delta U$ [kJ mol <sup>-1</sup> ]        | 3.26                  | 13.30                 |
| <u>Site 2</u>                             |                       |                       |
| $q^{sat}$ [mol kg <sup>-1</sup> ]         | 7.34                  | 0                     |
| $b^o$ [m <sup>3</sup> mol <sup>-1</sup> ] | $1.00 \times 10^{-7}$ | 0                     |
| $\Delta U$ [kJ mol <sup>-1</sup> ]        | 31.36                 | 50.00                 |



MOR

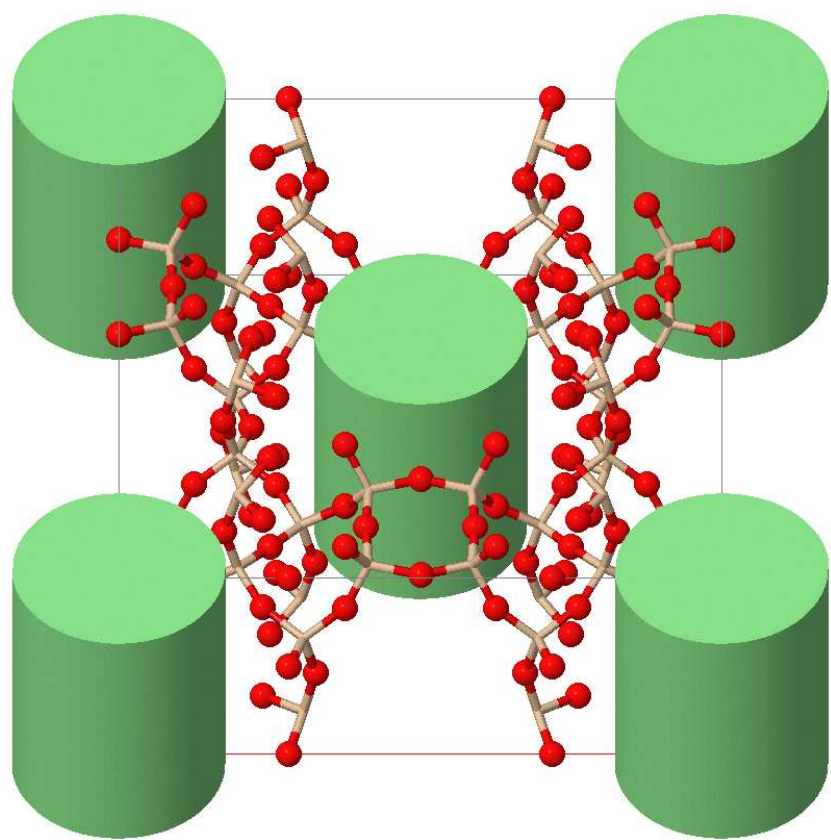

Figure S73: Main pore system of MOR from ZEOMICS. A unit cell is displayed where channels are green, cages are blue, and oxygen atoms of the zeolite structure are red.

Table S148: Physical properties for MOR.

| Property                            | Value |
|-------------------------------------|-------|
| Pore limiting diameter, PLD [Å]     | 6.5   |
| Largest cavity diameter, LCD [Å]    | 6.5   |
| Solid density [kg m <sup>-3</sup> ] | 1694  |

Table S149: Adsorption and geometric properties for MOR.

| Property                                                  | CO <sub>2</sub> | N <sub>2</sub> |
|-----------------------------------------------------------|-----------------|----------------|
| Henry constant [mol kg <sup>-1</sup> kPa <sup>-1</sup> ]  | 0.04816         | 0.00111        |
| Heat of adsorption at 298 K [kJ mol <sup>-1</sup> ]       | 27.7            | 14.7           |
| Accessible volume [cm <sup>3</sup> g <sup>-1</sup> ]      | 0.256           | 0.256          |
| Accessible surface area [m <sup>2</sup> g <sup>-1</sup> ] | 2079            | 2079           |

Table S150: Performance metrics for MOR.

| Property                                                          | Value  |
|-------------------------------------------------------------------|--------|
| Shape selectivity                                                 | –      |
| Size selectivity                                                  | –      |
| Adsorption selectivity                                            | 43.27  |
| Minimum parasitic energy [kJ/kg CO <sub>2</sub> ]                 | 947.06 |
| Purity [%] at minimum parasitic energy                            | 83.81  |
| Cost [\$/ton of CO <sub>2</sub> captured and compressed]          | 35.85  |
| Purity [%] at optimum cost                                        | 98.77  |
| Recovery [%] at optimum cost                                      | 90.18  |
| Energy penalty [kWh/ton CO <sub>2</sub> captured] at optimum cost | 276.71 |

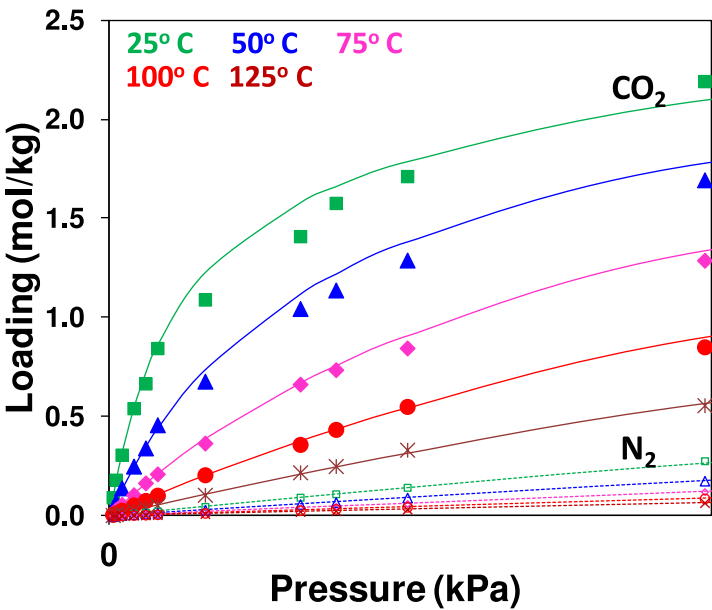

Figure S74: Adsorption isotherms of MOR. Symbols represent GCMC data, and lines represent predictions using the fitted dual-site Langmuir model (solid lines are for CO<sub>2</sub> and dashed lines are for N<sub>2</sub>).

Table S151: Dual-site Langmuir isotherm parameters for MOR.

| Parameter                                 | CO <sub>2</sub>       | N <sub>2</sub>        |
|-------------------------------------------|-----------------------|-----------------------|
| <u>Site 1</u>                             |                       |                       |
| $q^{sat}$ [mol kg <sup>-1</sup> ]         | 4.72                  | 4.72                  |
| $b^o$ [m <sup>3</sup> mol <sup>-1</sup> ] | $3.60 \times 10^{-7}$ | $4.00 \times 10^{-6}$ |
| $\Delta U$ [kJ mol <sup>-1</sup> ]        | 18.89                 | 12.13                 |
| <u>Site 2</u>                             |                       |                       |
| $q^{sat}$ [mol kg <sup>-1</sup> ]         | 2.82                  | 0                     |
| $b^o$ [m <sup>3</sup> mol <sup>-1</sup> ] | $4.00 \times 10^{-7}$ | 0                     |
| $\Delta U$ [kJ mol <sup>-1</sup> ]        | 29.49                 | 38.08                 |

MOZ

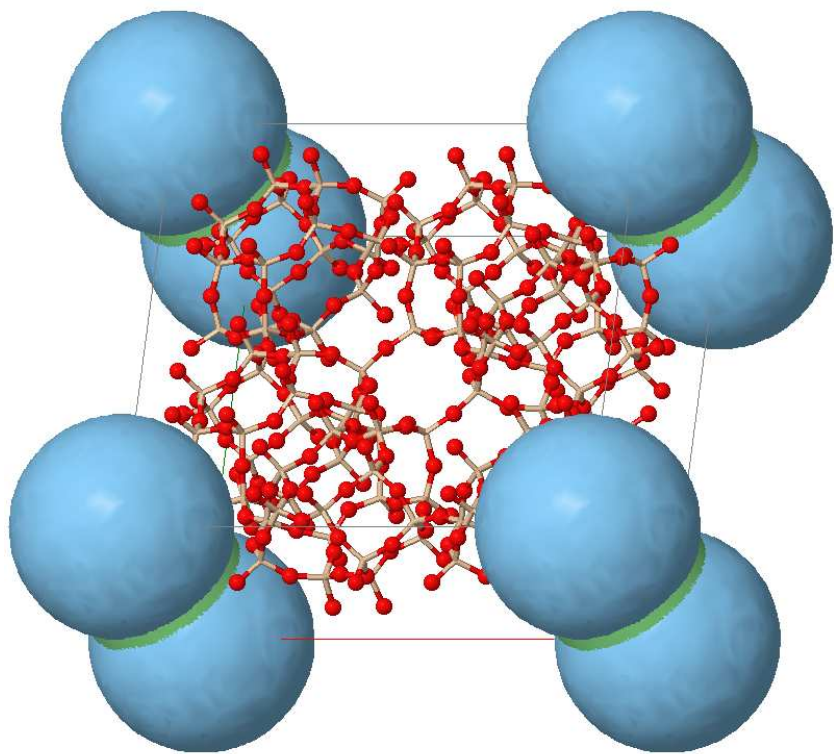

Figure S75: Main pore system of MOZ from ZEOMICS. A unit cell is displayed where channels are green, cages are blue, and oxygen atoms of the zeolite structure are red.

Table S152: Physical properties for MOZ.

| Property                            | Value |
|-------------------------------------|-------|
| Pore limiting diameter, PLD [Å]     | 8.2   |
| Largest cavity diameter, LCD [Å]    | 10.7  |
| Solid density [kg m <sup>-3</sup> ] | 1693  |

Table S153: Adsorption and geometric properties for MOZ.

| Property                                                  | CO <sub>2</sub> | N <sub>2</sub> |
|-----------------------------------------------------------|-----------------|----------------|
| Henry constant [mol kg <sup>-1</sup> kPa <sup>-1</sup> ]  | 0.01476         | 0.00060        |
| Heat of adsorption at 298 K [kJ mol <sup>-1</sup> ]       | 27.0            | 14.7           |
| Accessible volume [cm <sup>3</sup> g <sup>-1</sup> ]      | 0.114           | 0.222          |
| Accessible surface area [m <sup>2</sup> g <sup>-1</sup> ] | 551             | 1178           |

Table S154: Performance metrics for MOZ.

| Property                                                          | Value   |
|-------------------------------------------------------------------|---------|
| Shape selectivity                                                 | –       |
| Size selectivity                                                  | 0.49    |
| Adsorption selectivity                                            | 24.65   |
| Minimum parasitic energy [kJ/kg CO <sub>2</sub> ]                 | 1430.19 |
| Purity [%] at minimum parasitic energy                            | 70.16   |
| Cost [\$ /ton of CO <sub>2</sub> captured and compressed]         | 31.83   |
| Purity [%] at optimum cost                                        | 90.10   |
| Recovery [%] at optimum cost                                      | 92.58   |
| Energy penalty [kWh/ton CO <sub>2</sub> captured] at optimum cost | 181.21  |

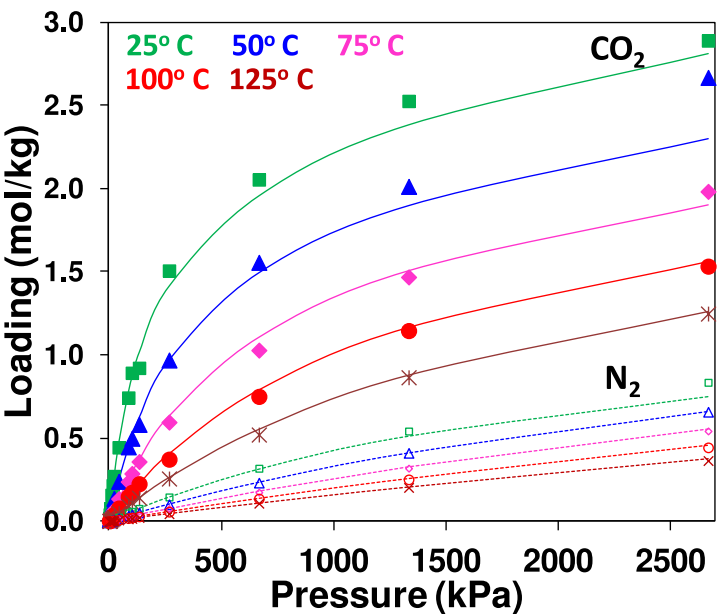

Figure S76: Adsorption isotherms of MOZ. Symbols represent GCMC data, and lines represent predictions using the fitted dual-site Langmuir model (solid lines are for CO<sub>2</sub> and dashed lines are for N<sub>2</sub>).

Table S155: Dual-site Langmuir isotherm parameters for MOZ.

| Parameter                                 | CO <sub>2</sub>       | N <sub>2</sub>        |
|-------------------------------------------|-----------------------|-----------------------|
| <u>Site 1</u>                             |                       |                       |
| $q^{sat}$ [mol kg <sup>-1</sup> ]         | 1.79                  | 1.45                  |
| $b^o$ [m <sup>3</sup> mol <sup>-1</sup> ] | $2.00 \times 10^{-6}$ | $1.40 \times 10^{-5}$ |
| $\Delta U$ [kJ mol <sup>-1</sup> ]        | 22.47                 | 0                     |
| <u>Site 2</u>                             |                       |                       |
| $q^{sat}$ [mol kg <sup>-1</sup> ]         | 3.47                  | 3.47                  |
| $b^o$ [m <sup>3</sup> mol <sup>-1</sup> ] | $1.20 \times 10^{-7}$ | $8.00 \times 10^{-6}$ |
| $\Delta U$ [kJ mol <sup>-1</sup> ]        | 21.32                 | 9.97                  |

MSO

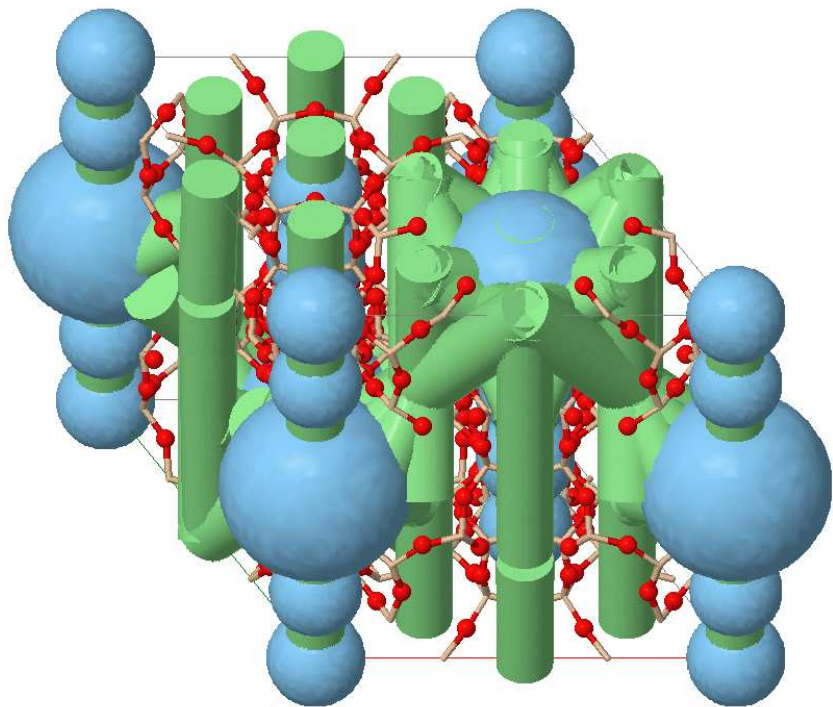

Figure S77: Main pore system of MSO from ZEOMICS. A unit cell is displayed where channels are green, cages are blue, and oxygen atoms of the zeolite structure are red.

Table S156: Physical properties for MSO.

| Property                            | Value |
|-------------------------------------|-------|
| Pore limiting diameter, PLD [Å]     | 2.6   |
| Largest cavity diameter, LCD [Å]    | 7.9   |
| Solid density [kg m <sup>-3</sup> ] | 1779  |

Table S157: Adsorption and geometric properties for MSO.

| Property                                                  | CO <sub>2</sub> | N <sub>2</sub> |
|-----------------------------------------------------------|-----------------|----------------|
| Henry constant [mol kg <sup>-1</sup> kPa <sup>-1</sup> ]  | 0.00526         | 0.00063        |
| Heat of adsorption at 298 K [kJ mol <sup>-1</sup> ]       | 22.7            | 10.9           |
| Accessible volume [cm <sup>3</sup> g <sup>-1</sup> ]      | –               | –              |
| Accessible surface area [m <sup>2</sup> g <sup>-1</sup> ] | –               | –              |

Table S158: Performance metrics for MSO.

| Property                                                          | Value  |
|-------------------------------------------------------------------|--------|
| Shape selectivity                                                 | 0.28   |
| Size selectivity                                                  | –      |
| Adsorption selectivity                                            | 8.35   |
| Minimum parasitic energy [kJ/kg CO <sub>2</sub> ]                 | –      |
| Purity [%] at minimum parasitic energy                            | –      |
| Cost [\$ /ton of CO <sub>2</sub> captured and compressed]         | 32.23  |
| Purity [%] at optimum cost                                        | 87.99  |
| Recovery [%] at optimum cost                                      | 81.33  |
| Energy penalty [kWh/ton CO <sub>2</sub> captured] at optimum cost | 207.91 |

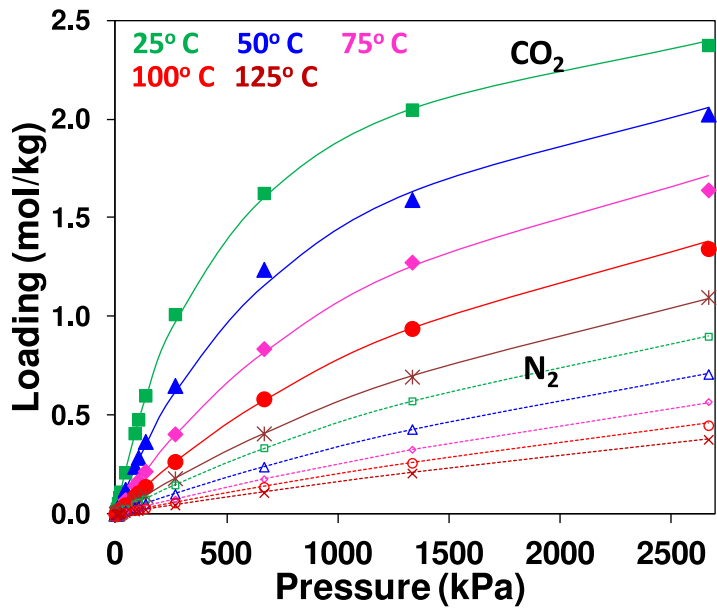

Figure S78: Adsorption isotherms of MSO. Symbols represent GCMC data, and lines represent predictions using the fitted dual-site Langmuir model (solid lines are for CO<sub>2</sub> and dashed lines are for N<sub>2</sub>).

Table S159: Dual-site Langmuir isotherm parameters for MSO.

| Parameter                                 | CO <sub>2</sub>       | N <sub>2</sub>        |
|-------------------------------------------|-----------------------|-----------------------|
| <u>Site 1</u>                             |                       |                       |
| $q^{sat}$ [mol kg <sup>-1</sup> ]         | 2.85                  | 2.30                  |
| $b^o$ [m <sup>3</sup> mol <sup>-1</sup> ] | 0                     | $8.00 \times 10^{-6}$ |
| $\Delta U$ [kJ mol <sup>-1</sup> ]        | 21.86                 | 10.72                 |
| <u>Site 2</u>                             |                       |                       |
| $q^{sat}$ [mol kg <sup>-1</sup> ]         | 2.85                  | 0.92                  |
| $b^o$ [m <sup>3</sup> mol <sup>-1</sup> ] | $5.00 \times 10^{-6}$ | $1.38 \times 10^{-4}$ |
| $\Delta U$ [kJ mol <sup>-1</sup> ]        | 17.04                 | 0                     |



MTN

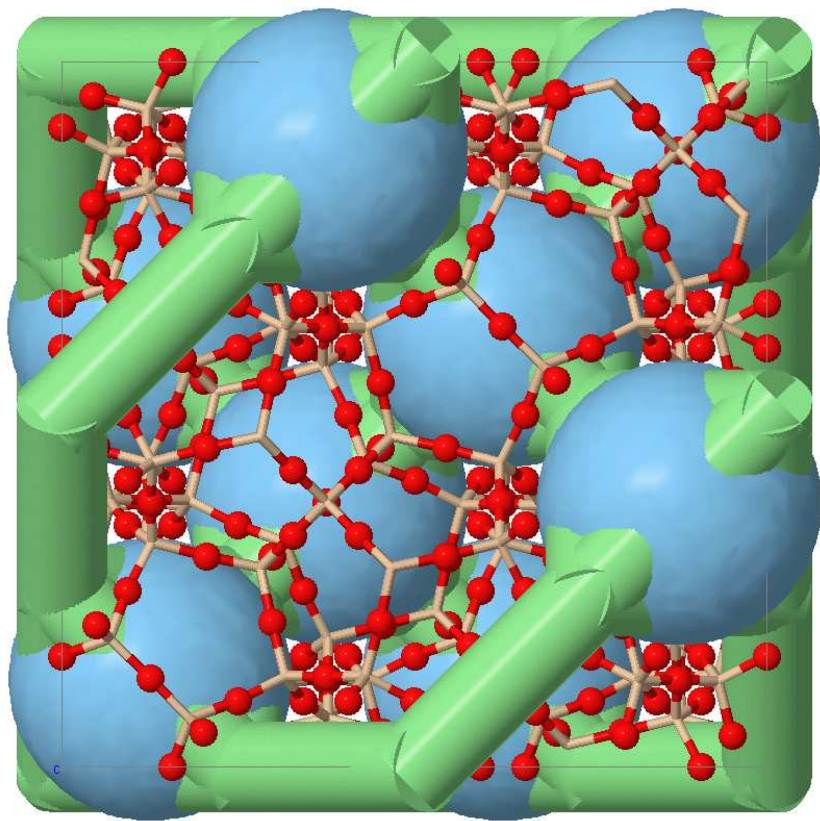

Figure S79: Main pore system of MTN from ZEOMICS. A unit cell is displayed where channels are green, cages are blue, and oxygen atoms of the zeolite structure are red.

Table S160: Physical properties for MTN.

| Property                            | Value |
|-------------------------------------|-------|
| Pore limiting diameter, PLD [Å]     | 2.5   |
| Largest cavity diameter, LCD [Å]    | 8.0   |
| Solid density [kg m <sup>-3</sup> ] | 1713  |

Table S161: Adsorption and geometric properties for MTN.

| Property                                                  | CO <sub>2</sub> | N <sub>2</sub> |
|-----------------------------------------------------------|-----------------|----------------|
| Henry constant [mol kg <sup>-1</sup> kPa <sup>-1</sup> ]  | 0.00287         | 0.00054        |
| Heat of adsorption at 298 K [kJ mol <sup>-1</sup> ]       | 2.5             | 13.6           |
| Accessible volume [cm <sup>3</sup> g <sup>-1</sup> ]      | –               | –              |
| Accessible surface area [m <sup>2</sup> g <sup>-1</sup> ] | –               | –              |

Table S162: Performance metrics for MTN.

| Property                                                          | Value  |
|-------------------------------------------------------------------|--------|
| Shape selectivity                                                 | 0.13   |
| Size selectivity                                                  | –      |
| Adsorption selectivity                                            | 5.31   |
| Minimum parasitic energy [kJ/kg CO <sub>2</sub> ]                 | –      |
| Purity [%] at minimum parasitic energy                            | –      |
| Cost [\$/ton of CO <sub>2</sub> captured and compressed]          | 36.73  |
| Purity [%] at optimum cost                                        | 85.70  |
| Recovery [%] at optimum cost                                      | 73.70  |
| Energy penalty [kWh/ton CO <sub>2</sub> captured] at optimum cost | 226.27 |

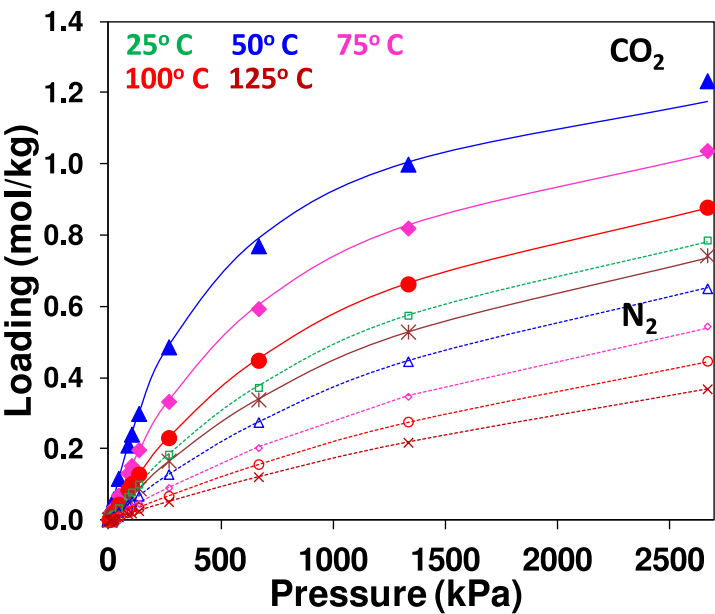

Figure S80: Adsorption isotherms of MTN. Symbols represent GCMC data, and lines represent predictions using the fitted dual-site Langmuir model (solid lines are for CO<sub>2</sub> and dashed lines are for N<sub>2</sub>).

Table S163: Dual-site Langmuir isotherm parameters for MTN.

| Parameter                                 | CO <sub>2</sub>       | N <sub>2</sub>        |
|-------------------------------------------|-----------------------|-----------------------|
| <u>Site 1</u>                             |                       |                       |
| $q^{sat}$ [mol kg <sup>-1</sup> ]         | 1.48                  | 1.48                  |
| $b^o$ [m <sup>3</sup> mol <sup>-1</sup> ] | $6.00 \times 10^{-6}$ | $1.30 \times 10^{-5}$ |
| $\Delta U$ [kJ mol <sup>-1</sup> ]        | 9.81                  | 11.44                 |
| <u>Site 2</u>                             |                       |                       |
| $q^{sat}$ [mol kg <sup>-1</sup> ]         | 1.32                  | 0.10                  |
| $b^o$ [m <sup>3</sup> mol <sup>-1</sup> ] | $9.00 \times 10^{-6}$ | $2.48 \times 10^{-4}$ |
| $\Delta U$ [kJ mol <sup>-1</sup> ]        | 17.48                 | 2.58                  |



MVY

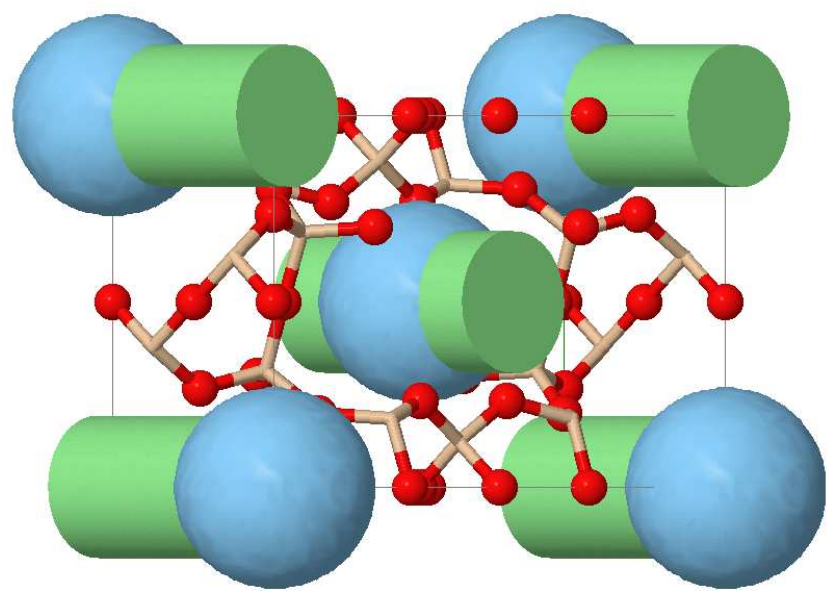

Figure S81: Main pore system of MVY from ZEOMICS. A unit cell is displayed where channels are green, cages are blue, and oxygen atoms of the zeolite structure are red.

Table S164: Physical properties for MVY.

| Property                            | Value |
|-------------------------------------|-------|
| Pore limiting diameter, PLD [Å]     | 3.1   |
| Largest cavity diameter, LCD [Å]    | 4.4   |
| Solid density [kg m <sup>-3</sup> ] | 2093  |

Table S165: Adsorption and geometric properties for MVY.

| Property                                                  | CO <sub>2</sub> | N <sub>2</sub> |
|-----------------------------------------------------------|-----------------|----------------|
| Henry constant [mol kg <sup>-1</sup> kPa <sup>-1</sup> ]  | 0.04530         | 0.00002        |
| Heat of adsorption at 298 K [kJ mol <sup>-1</sup> ]       | 41.2            | 2.5            |
| Accessible volume [cm <sup>3</sup> g <sup>-1</sup> ]      | –               | 0.193          |
| Accessible surface area [m <sup>2</sup> g <sup>-1</sup> ] | –               | 380            |

Table S166: Performance metrics for MVY.

| Property                                                          | Value  |
|-------------------------------------------------------------------|--------|
| Shape selectivity                                                 | 0.34   |
| Size selectivity                                                  | 1.00   |
| Adsorption selectivity                                            | 2709   |
| Minimum parasitic energy [kJ/kg CO <sub>2</sub> ]                 | 926.30 |
| Purity [%] at minimum parasitic energy                            | 96.57  |
| Cost [\$ /ton of CO <sub>2</sub> captured and compressed]         | 26.74  |
| Purity [%] at optimum cost                                        | 95.29  |
| Recovery [%] at optimum cost                                      | 96.57  |
| Energy penalty [kWh/ton CO <sub>2</sub> captured] at optimum cost | 156.07 |

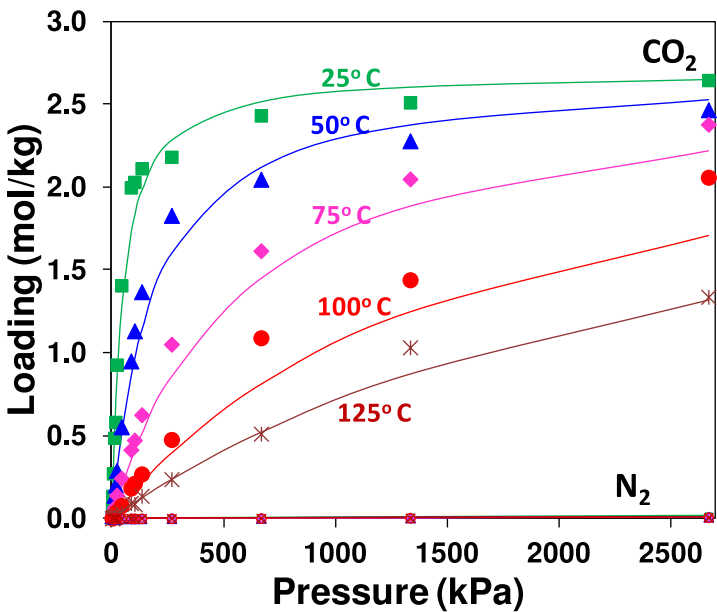

Figure S82: Adsorption isotherms of MVY. Symbols represent GCMC data, and lines represent predictions using the fitted dual-site Langmuir model (solid lines are for CO<sub>2</sub> and dashed lines are for N<sub>2</sub>).

Table S167: Dual-site Langmuir isotherm parameters for MVY.

| Parameter                                 | CO <sub>2</sub>       | N <sub>2</sub>        |
|-------------------------------------------|-----------------------|-----------------------|
| <u>Site 1</u>                             |                       |                       |
| $q^{sat}$ [mol kg <sup>-1</sup> ]         | 2.04                  | 3.18                  |
| $b^o$ [m <sup>3</sup> mol <sup>-1</sup> ] | 0                     | $1.90 \times 10^{-7}$ |
| $\Delta U$ [kJ mol <sup>-1</sup> ]        | 49.97                 | 7.67                  |
| <u>Site 2</u>                             |                       |                       |
| $q^{sat}$ [mol kg <sup>-1</sup> ]         | 2.90                  | 3.18                  |
| $b^o$ [m <sup>3</sup> mol <sup>-1</sup> ] | $1.00 \times 10^{-8}$ | 0                     |
| $\Delta U$ [kJ mol <sup>-1</sup> ]        | 37.78                 | 14.90                 |

NAB

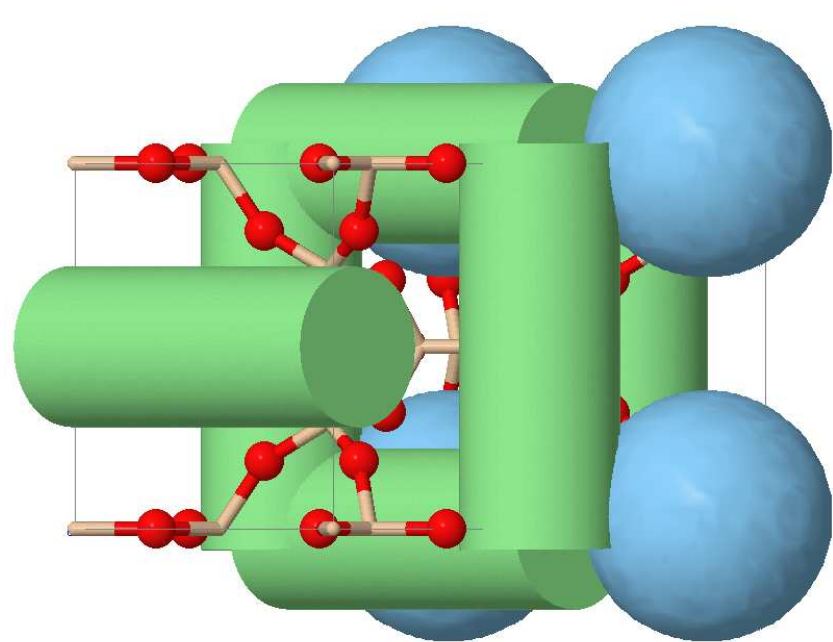

Figure S83: Main pore system of NAB from ZEOMICS. A unit cell is displayed where channels are green, cages are blue, and oxygen atoms of the zeolite structure are red.

Table S168: Physical properties for NAB.

| Property                            | Value |
|-------------------------------------|-------|
| Pore limiting diameter, PLD [Å]     | 3.2   |
| Largest cavity diameter, LCD [Å]    | 5.0   |
| Solid density [kg m <sup>-3</sup> ] | 1605  |

Table S169: Adsorption and geometric properties for NAB.

| Property                                                  | CO <sub>2</sub> | N <sub>2</sub> |
|-----------------------------------------------------------|-----------------|----------------|
| Henry constant [mol kg <sup>-1</sup> kPa <sup>-1</sup> ]  | 0.01799         | 0.00042        |
| Heat of adsorption at 298 K [kJ mol <sup>-1</sup> ]       | 32.0            | 12.3           |
| Accessible volume [cm <sup>3</sup> g <sup>-1</sup> ]      | –               | 0.408          |
| Accessible surface area [m <sup>2</sup> g <sup>-1</sup> ] | –               | 615            |

Table S170: Performance metrics for NAB.

| Property                                                          | Value   |
|-------------------------------------------------------------------|---------|
| Shape selectivity                                                 | –       |
| Size selectivity                                                  | 1.00    |
| Adsorption selectivity                                            | 42.74   |
| Minimum parasitic energy [kJ/kg CO <sub>2</sub> ]                 | 1249.07 |
| Purity [%] at minimum parasitic energy                            | 80.94   |
| Cost [\$ /ton of CO <sub>2</sub> captured and compressed]         | 26.01   |
| Purity [%] at optimum cost                                        | 93.99   |
| Recovery [%] at optimum cost                                      | 91.20   |
| Energy penalty [kWh/ton CO <sub>2</sub> captured] at optimum cost | 161.42  |

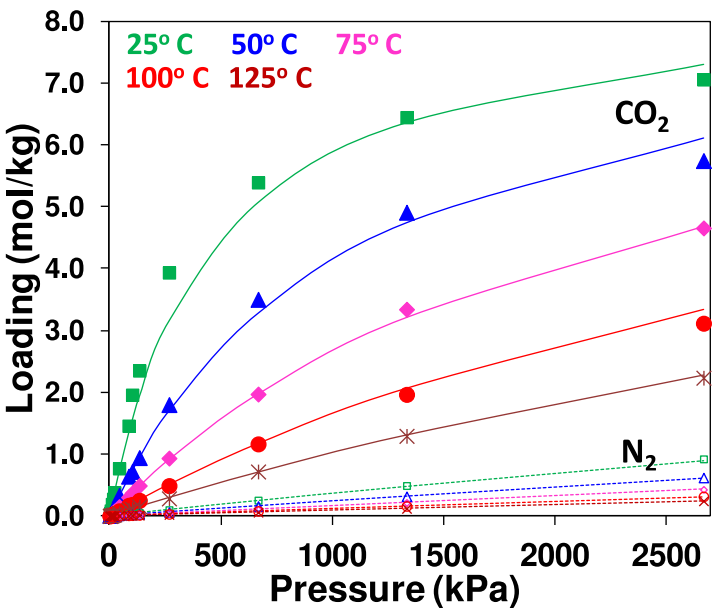

Figure S84: Adsorption isotherms of NAB. Symbols represent GCMC data, and lines represent predictions using the fitted dual-site Langmuir model (solid lines are for CO<sub>2</sub> and dashed lines are for N<sub>2</sub>).

Table S171: Dual-site Langmuir isotherm parameters for NAB.

| Parameter                                 | CO <sub>2</sub>       | N <sub>2</sub>        |
|-------------------------------------------|-----------------------|-----------------------|
| <u>Site 1</u>                             |                       |                       |
| $q^{sat}$ [mol kg <sup>-1</sup> ]         | 8.47                  | 8.47                  |
| $b^o$ [m <sup>3</sup> mol <sup>-1</sup> ] | $7.00 \times 10^{-6}$ | $1.00 \times 10^{-6}$ |
| $\Delta U$ [kJ mol <sup>-1</sup> ]        | 0                     | 10.86                 |
| <u>Site 2</u>                             |                       |                       |
| $q^{sat}$ [mol kg <sup>-1</sup> ]         | 8.47                  | 8.47                  |
| $b^o$ [m <sup>3</sup> mol <sup>-1</sup> ] | $2.50 \times 10^{-7}$ | 0                     |
| $\Delta U$ [kJ mol <sup>-1</sup> ]        | 24.82                 | 50.00                 |

NON

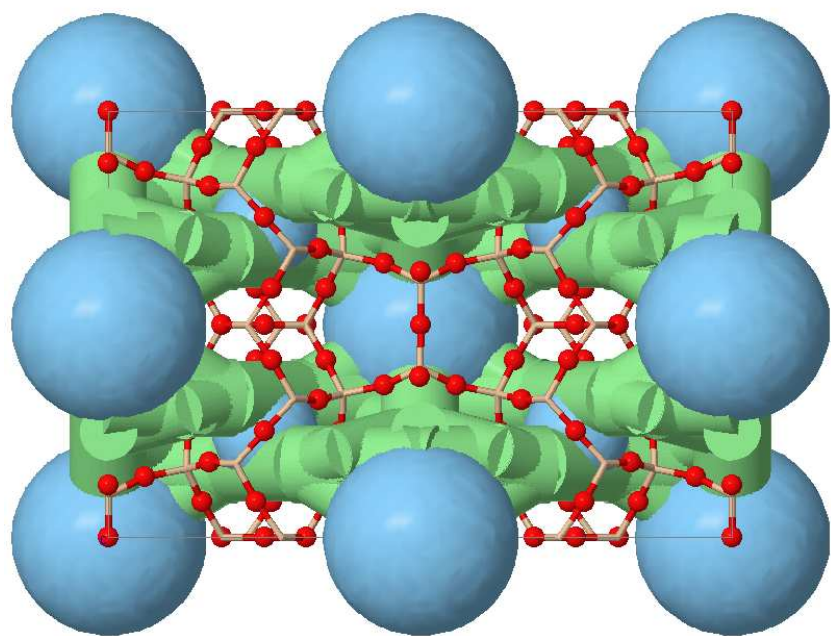

Figure S85: Main pore system of NON from ZEOMICS. A unit cell is displayed where channels are green, cages are blue, and oxygen atoms of the zeolite structure are red.

Table S172: Physical properties for NON.

| Property                            | Value |
|-------------------------------------|-------|
| Pore limiting diameter, PLD [Å]     | 2.9   |
| Largest cavity diameter, LCD [Å]    | 7.1   |
| Solid density [kg m <sup>-3</sup> ] | 1760  |

Table S173: Adsorption and geometric properties for NON.

| Property                                                  | CO <sub>2</sub> | N <sub>2</sub> |
|-----------------------------------------------------------|-----------------|----------------|
| Henry constant [mol kg <sup>-1</sup> kPa <sup>-1</sup> ]  | 0.00636         | 0.00067        |
| Heat of adsorption at 298 K [kJ mol <sup>-1</sup> ]       | 23.2            | 14.1           |
| Accessible volume [cm <sup>3</sup> g <sup>-1</sup> ]      | –               | –              |
| Accessible surface area [m <sup>2</sup> g <sup>-1</sup> ] | –               | –              |

Table S174: Performance metrics for NON.

| Property                                                          | Value  |
|-------------------------------------------------------------------|--------|
| Shape selectivity                                                 | 0.41   |
| Size selectivity                                                  | –      |
| Adsorption selectivity                                            | 9.53   |
| Minimum parasitic energy [kJ/kg CO <sub>2</sub> ]                 | –      |
| Purity [%] at minimum parasitic energy                            | –      |
| Cost [\$ /ton of CO <sub>2</sub> captured and compressed]         | 32.68  |
| Purity [%] at optimum cost                                        | 89.92  |
| Recovery [%] at optimum cost                                      | 79.50  |
| Energy penalty [kWh/ton CO <sub>2</sub> captured] at optimum cost | 224.58 |

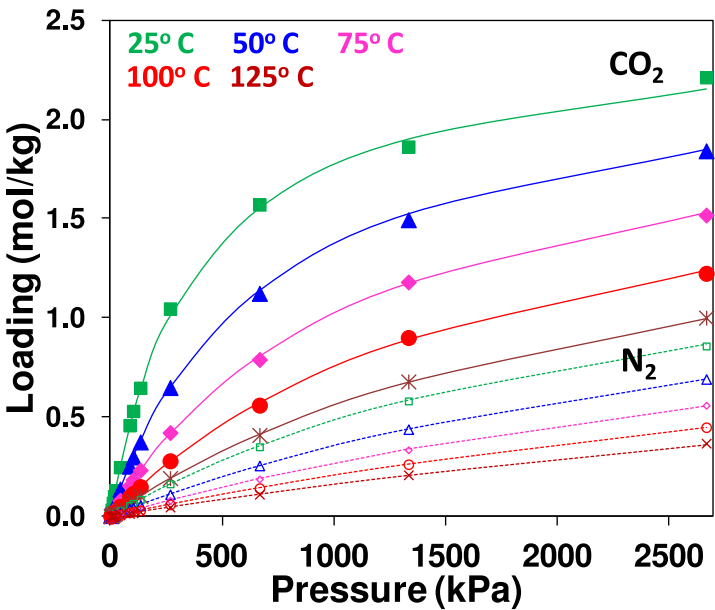

Figure S86: Adsorption isotherms of NON. Symbols represent GCMC data, and lines represent predictions using the fitted dual-site Langmuir model (solid lines are for CO<sub>2</sub> and dashed lines are for N<sub>2</sub>).

Table S175: Dual-site Langmuir isotherm parameters for NON.

| Parameter                                 | CO <sub>2</sub>       | N <sub>2</sub>        |
|-------------------------------------------|-----------------------|-----------------------|
| <u>Site 1</u>                             |                       |                       |
| $q^{sat}$ [mol kg <sup>-1</sup> ]         | 2.66                  | 1.82                  |
| $b^o$ [m <sup>3</sup> mol <sup>-1</sup> ] | $8.40 \times 10^{-5}$ | $1.50 \times 10^{-5}$ |
| $\Delta U$ [kJ mol <sup>-1</sup> ]        | 0                     | 10.18                 |
| <u>Site 2</u>                             |                       |                       |
| $q^{sat}$ [mol kg <sup>-1</sup> ]         | 2.66                  | 0.01                  |
| $b^o$ [m <sup>3</sup> mol <sup>-1</sup> ] | $3.00 \times 10^{-6}$ | $2.80 \times 10^{-4}$ |
| $\Delta U$ [kJ mol <sup>-1</sup> ]        | 18.63                 | 2.90                  |

OFF

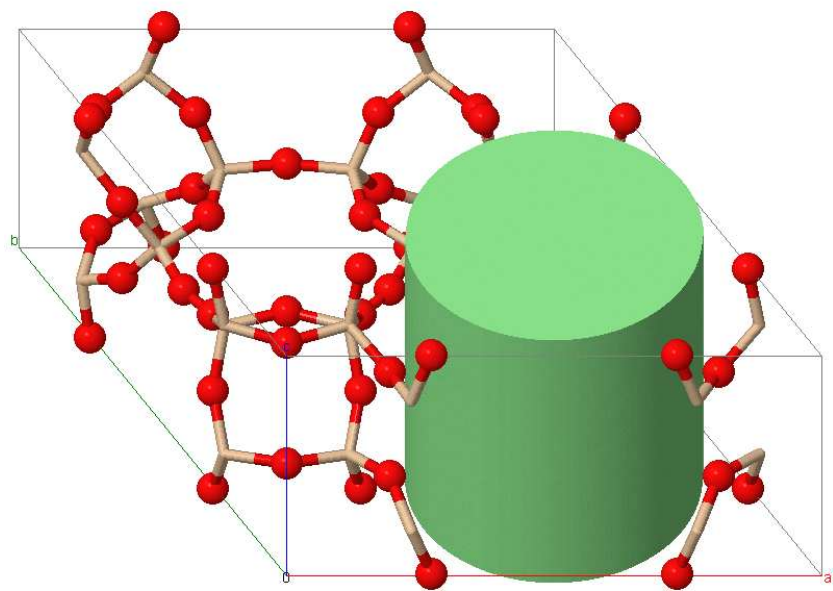

Figure S87: Main pore system of OFF from ZEOMICS. A unit cell is displayed where channels are green, cages are blue, and oxygen atoms of the zeolite structure are red.

Table S176: Physical properties for OFF.

| Property                            | Value |
|-------------------------------------|-------|
| Pore limiting diameter, PLD [Å]     | 7.3   |
| Largest cavity diameter, LCD [Å]    | 7.3   |
| Solid density [kg m <sup>-3</sup> ] | 1606  |

Table S177: Adsorption and geometric properties for OFF.

| Property                                                  | CO <sub>2</sub> | N <sub>2</sub> |
|-----------------------------------------------------------|-----------------|----------------|
| Henry constant [mol kg <sup>-1</sup> kPa <sup>-1</sup> ]  | 0.01976         | 0.00106        |
| Heat of adsorption at 298 K [kJ mol <sup>-1</sup> ]       | 25.7            | 12.2           |
| Accessible volume [cm <sup>3</sup> g <sup>-1</sup> ]      | 0.181           | 0.330          |
| Accessible surface area [m <sup>2</sup> g <sup>-1</sup> ] | 960             | 2579           |

Table S178: Performance metrics for OFF.

| Property                                                          | Value   |
|-------------------------------------------------------------------|---------|
| Shape selectivity                                                 | –       |
| Size selectivity                                                  | 0.45    |
| Adsorption selectivity                                            | 18.59   |
| Minimum parasitic energy [kJ/kg CO <sub>2</sub> ]                 | 1391.65 |
| Purity [%] at minimum parasitic energy                            | 67.60   |
| Cost [\$ /ton of CO <sub>2</sub> captured and compressed]         | 29.30   |
| Purity [%] at optimum cost                                        | 90.15   |
| Recovery [%] at optimum cost                                      | 90.28   |
| Energy penalty [kWh/ton CO <sub>2</sub> captured] at optimum cost | 173.27  |

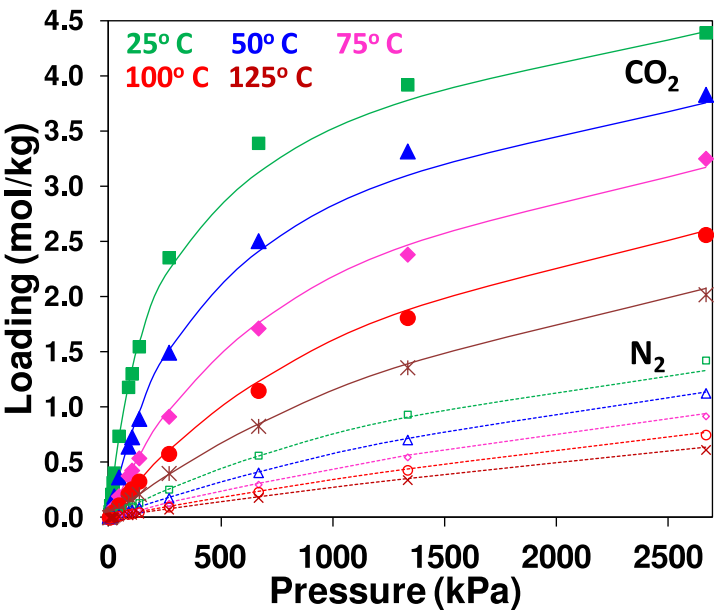

Figure S88: Adsorption isotherms of OFF. Symbols represent GCMC data, and lines represent predictions using the fitted dual-site Langmuir model (solid lines are for CO<sub>2</sub> and dashed lines are for N<sub>2</sub>).

Table S179: Dual-site Langmuir isotherm parameters for OFF.

| Parameter                                 | CO <sub>2</sub>       | N <sub>2</sub>        |
|-------------------------------------------|-----------------------|-----------------------|
| <u>Site 1</u>                             |                       |                       |
| $q^{sat}$ [mol kg <sup>-1</sup> ]         | 5.27                  | 5.27                  |
| $b^o$ [m <sup>3</sup> mol <sup>-1</sup> ] | $6.20 \times 10^{-7}$ | $9.00 \times 10^{-6}$ |
| $\Delta U$ [kJ mol <sup>-1</sup> ]        | 16.87                 | 9.94                  |
| <u>Site 2</u>                             |                       |                       |
| $q^{sat}$ [mol kg <sup>-1</sup> ]         | 3.08                  | 0                     |
| $b^o$ [m <sup>3</sup> mol <sup>-1</sup> ] | $2.00 \times 10^{-6}$ | 0                     |
| $\Delta U$ [kJ mol <sup>-1</sup> ]        | 22.88                 | 50.00                 |



RRO

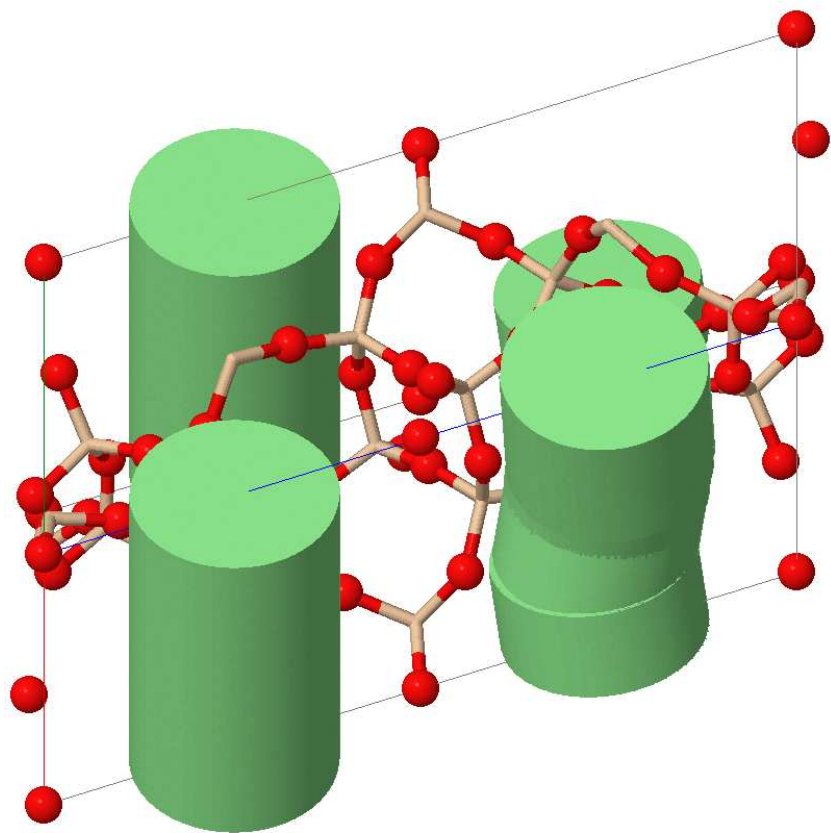

Figure S89: Main pore system of RRO from ZEOMICS. A unit cell is displayed where channels are green, cages are blue, and oxygen atoms of the zeolite structure are red.

Table S180: Physical properties for RRO.

| Property                            | Value |
|-------------------------------------|-------|
| Pore limiting diameter, PLD [Å]     | 4.4   |
| Largest cavity diameter, LCD [Å]    | 4.4   |
| Solid density [kg m <sup>-3</sup> ] | 1782  |

Table S181: Adsorption and geometric properties for RRO.

| Property                                                  | CO <sub>2</sub> | N <sub>2</sub> |
|-----------------------------------------------------------|-----------------|----------------|
| Henry constant [mol kg <sup>-1</sup> kPa <sup>-1</sup> ]  | 0.03302         | 0.00045        |
| Heat of adsorption at 298 K [kJ mol <sup>-1</sup> ]       | 32.6            | 17.0           |
| Accessible volume [cm <sup>3</sup> g <sup>-1</sup> ]      | 0.151           | 0.151          |
| Accessible surface area [m <sup>2</sup> g <sup>-1</sup> ] | 1094            | 1094           |

Table S182: Performance metrics for RRO.

| Property                                                          | Value  |
|-------------------------------------------------------------------|--------|
| Shape selectivity                                                 | –      |
| Size selectivity                                                  | –      |
| Adsorption selectivity                                            | 73.53  |
| Minimum parasitic energy [kJ/kg CO <sub>2</sub> ]                 | 880.80 |
| Purity [%] at minimum parasitic energy                            | 89.34  |
| Cost [\$ /ton of CO <sub>2</sub> captured and compressed]         | 29.68  |
| Purity [%] at optimum cost                                        | 90.18  |
| Recovery [%] at optimum cost                                      | 90.00  |
| Energy penalty [kWh/ton CO <sub>2</sub> captured] at optimum cost | 154.06 |

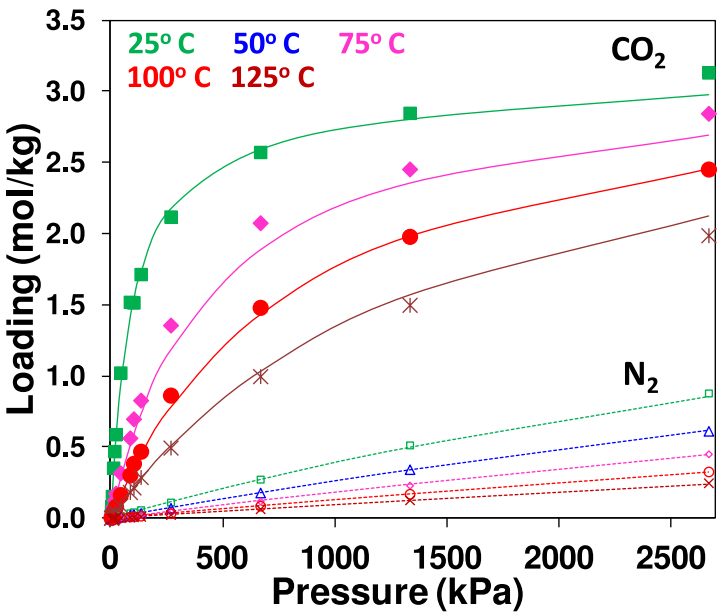

Figure S90: Adsorption isotherms of RRO. Symbols represent GCMC data, and lines represent predictions using the fitted dual-site Langmuir model (solid lines are for CO<sub>2</sub> and dashed lines are for N<sub>2</sub>).

Table S183: Dual-site Langmuir isotherm parameters for RRO.

| Parameter                                 | CO <sub>2</sub>       | N <sub>2</sub>        |
|-------------------------------------------|-----------------------|-----------------------|
| <u>Site 1</u>                             |                       |                       |
| $q^{sat}$ [mol kg <sup>-1</sup> ]         | 3.76                  | 3.76                  |
| $b^o$ [m <sup>3</sup> mol <sup>-1</sup> ] | 0                     | $2.00 \times 10^{-6}$ |
| $\Delta U$ [kJ mol <sup>-1</sup> ]        | 50.00                 | 12.17                 |
| <u>Site 2</u>                             |                       |                       |
| $q^{sat}$ [mol kg <sup>-1</sup> ]         | 3.76                  | 0                     |
| $b^o$ [m <sup>3</sup> mol <sup>-1</sup> ] | $2.00 \times 10^{-6}$ | $3.00 \times 10^{-8}$ |
| $\Delta U$ [kJ mol <sup>-1</sup> ]        | 23.36                 | 30.89                 |

RWR

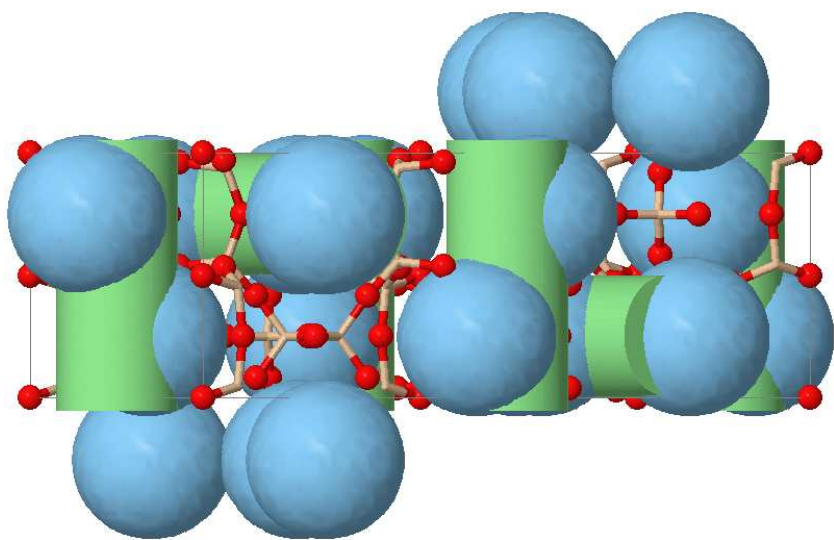

Figure S91: Main pore system of RWR from ZEOMICS. A unit cell is displayed where channels are green, cages are blue, and oxygen atoms of the zeolite structure are red.

Table S184: Physical properties for RWR.

| Property                            | Value |
|-------------------------------------|-------|
| Pore limiting diameter, PLD [Å]     | 3.8   |
| Largest cavity diameter, LCD [Å]    | 5.1   |
| Solid density [kg m <sup>-3</sup> ] | 1791  |

Table S185: Adsorption and geometric properties for RWR.

| Property                                                  | CO <sub>2</sub> | N <sub>2</sub> |
|-----------------------------------------------------------|-----------------|----------------|
| Henry constant [mol kg <sup>-1</sup> kPa <sup>-1</sup> ]  | 0.06993         | 0.00071        |
| Heat of adsorption at 298 K [kJ mol <sup>-1</sup> ]       | 35.2            | 18.1           |
| Accessible volume [cm <sup>3</sup> g <sup>-1</sup> ]      | 0.251           | 0.251          |
| Accessible surface area [m <sup>2</sup> g <sup>-1</sup> ] | 1320            | 1320           |

Table S186: Performance metrics for RWR.

| Property                                                          | Value  |
|-------------------------------------------------------------------|--------|
| Shape selectivity                                                 | –      |
| Size selectivity                                                  | –      |
| Adsorption selectivity                                            | 97.81  |
| Minimum parasitic energy [kJ/kg CO <sub>2</sub> ]                 | 903.26 |
| Purity [%] at minimum parasitic energy                            | 88.46  |
| Cost [\$ /ton of CO <sub>2</sub> captured and compressed]         | 29.14  |
| Purity [%] at optimum cost                                        | 90.06  |
| Recovery [%] at optimum cost                                      | 90.44  |
| Energy penalty [kWh/ton CO <sub>2</sub> captured] at optimum cost | 168.41 |

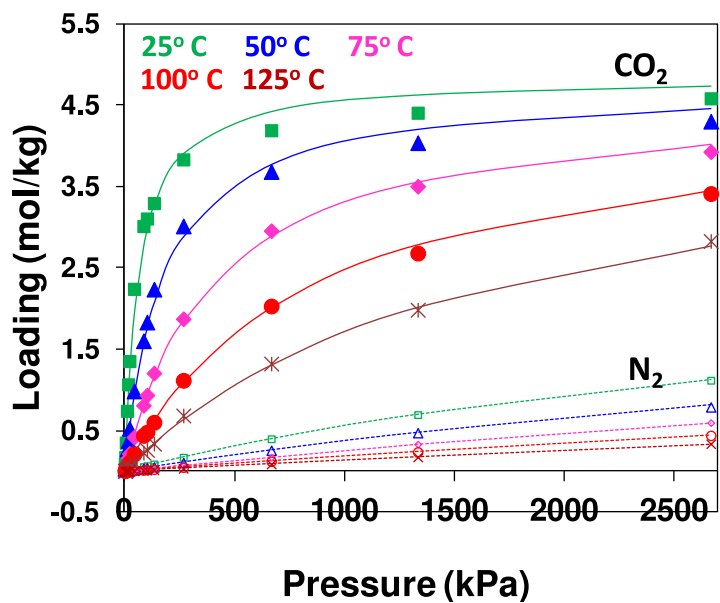

Figure S92: Adsorption isotherms of RWR. Symbols represent GCMC data, and lines represent predictions using the fitted dual-site Langmuir model (solid lines are for CO<sub>2</sub> and dashed lines are for N<sub>2</sub>).

Table S187: Dual-site Langmuir isotherm parameters for RWR.

| Parameter                                 | CO <sub>2</sub>       | N <sub>2</sub>        |
|-------------------------------------------|-----------------------|-----------------------|
| <u>Site 1</u>                             |                       |                       |
| $q^{sat}$ [mol kg <sup>-1</sup> ]         | 2.49                  | 2.91                  |
| $b^o$ [m <sup>3</sup> mol <sup>-1</sup> ] | 0                     | $3.00 \times 10^{-6}$ |
| $\Delta U$ [kJ mol <sup>-1</sup> ]        | 4.02                  | 12.93                 |
| <u>Site 2</u>                             |                       |                       |
| $q^{sat}$ [mol kg <sup>-1</sup> ]         | 5.50                  | 0                     |
| $b^o$ [m <sup>3</sup> mol <sup>-1</sup> ] | $2.10 \times 10^{-7}$ | $2.90 \times 10^{-7}$ |
| $\Delta U$ [kJ mol <sup>-1</sup> ]        | 29.69                 | 23.90                 |

**RWY**

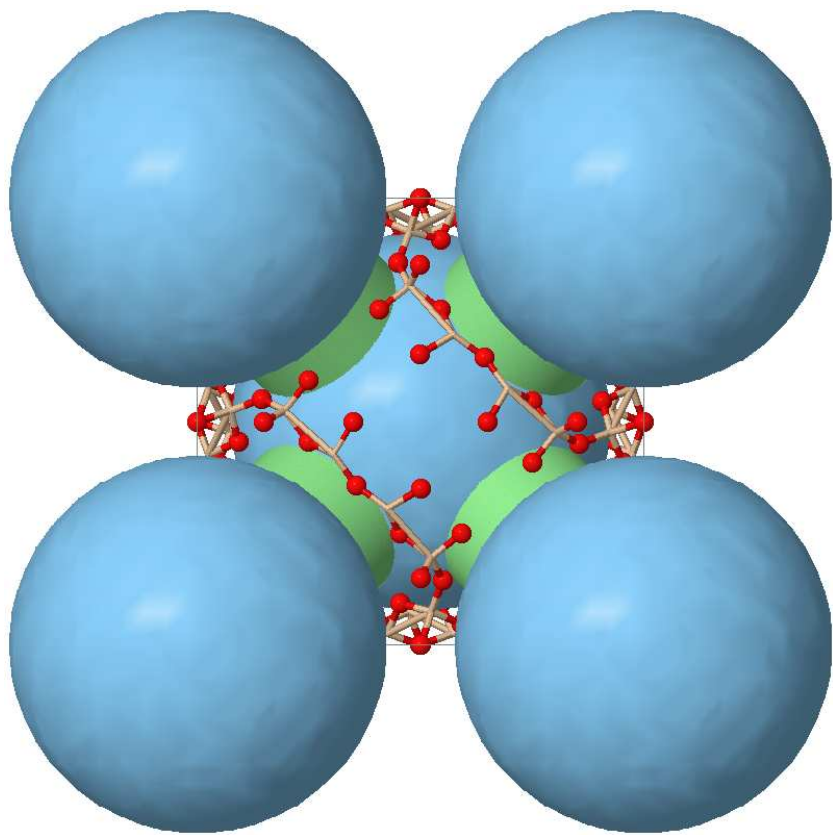

Figure S93: Main pore system of RWY from ZEOMICS. A unit cell is displayed where channels are green, cages are blue, and oxygen atoms of the zeolite structure are red.

Table S188: Physical properties for RWY.

| Property                            | Value |
|-------------------------------------|-------|
| Pore limiting diameter, PLD [Å]     | 6.9   |
| Largest cavity diameter, LCD [Å]    | 15.0  |
| Solid density [kg m <sup>-3</sup> ] | 855   |

Table S189: Adsorption and geometric properties for RWY.

| Property                                                  | CO <sub>2</sub> | N <sub>2</sub> |
|-----------------------------------------------------------|-----------------|----------------|
| Henry constant [mol kg <sup>-1</sup> kPa <sup>-1</sup> ]  | 0.00428         | 0.00107        |
| Heat of adsorption at 298 K [kJ mol <sup>-1</sup> ]       | 17.2            | 8.1            |
| Accessible volume [cm <sup>3</sup> g <sup>-1</sup> ]      | 0.903           | 0.922          |
| Accessible surface area [m <sup>2</sup> g <sup>-1</sup> ] | 1492            | 1688           |

Table S190: Performance metrics for RWY.

| Property                                                          | Value   |
|-------------------------------------------------------------------|---------|
| Shape selectivity                                                 | –       |
| Size selectivity                                                  | 0.02    |
| Adsorption selectivity                                            | 4.00    |
| Minimum parasitic energy [kJ/kg CO <sub>2</sub> ]                 | 3953.60 |
| Purity [%] at minimum parasitic energy                            | 30.43   |
| Cost [\$ /ton of CO <sub>2</sub> captured and compressed]         | 55.90   |
| Purity [%] at optimum cost                                        | 86.40   |
| Recovery [%] at optimum cost                                      | 82.20   |
| Energy penalty [kWh/ton CO <sub>2</sub> captured] at optimum cost | 248.21  |

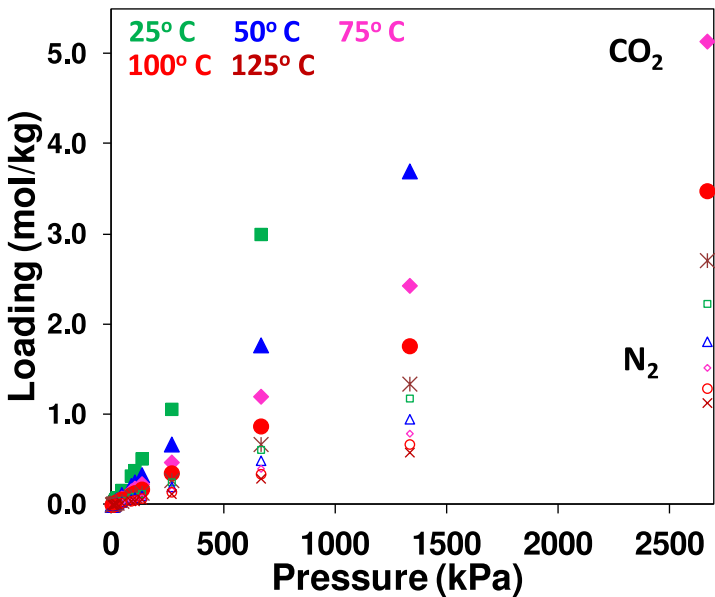

Figure S94: Adsorption isotherms of RWY. Symbols represent GCMC data, and lines represent predictions using the fitted dual-site Langmuir model (solid lines are for CO<sub>2</sub> and dashed lines are for N<sub>2</sub>).

Table S191: Dual-site Langmuir isotherm parameters for RWY.

| Parameter                                 | CO <sub>2</sub>       | N <sub>2</sub>        |
|-------------------------------------------|-----------------------|-----------------------|
| <u>Site 1</u>                             |                       |                       |
| $q^{sat}$ [mol kg <sup>-1</sup> ]         | 12.03                 | 12.22                 |
| $b^o$ [m <sup>3</sup> mol <sup>-1</sup> ] | $5.02 \times 10^{-1}$ | $6.92 \times 10^{-1}$ |
| $\Delta U$ [kJ mol <sup>-1</sup> ]        | 33.15                 | 23.66                 |
| <u>Site 2</u>                             |                       |                       |
| $q^{sat}$ [mol kg <sup>-1</sup> ]         | 7.37                  | 21.35                 |
| $b^o$ [m <sup>3</sup> mol <sup>-1</sup> ] | $7.65 \times 10^{-1}$ | $7.73 \times 10^{-1}$ |
| $\Delta U$ [kJ mol <sup>-1</sup> ]        | 2.18                  | 14.82                 |

SAO

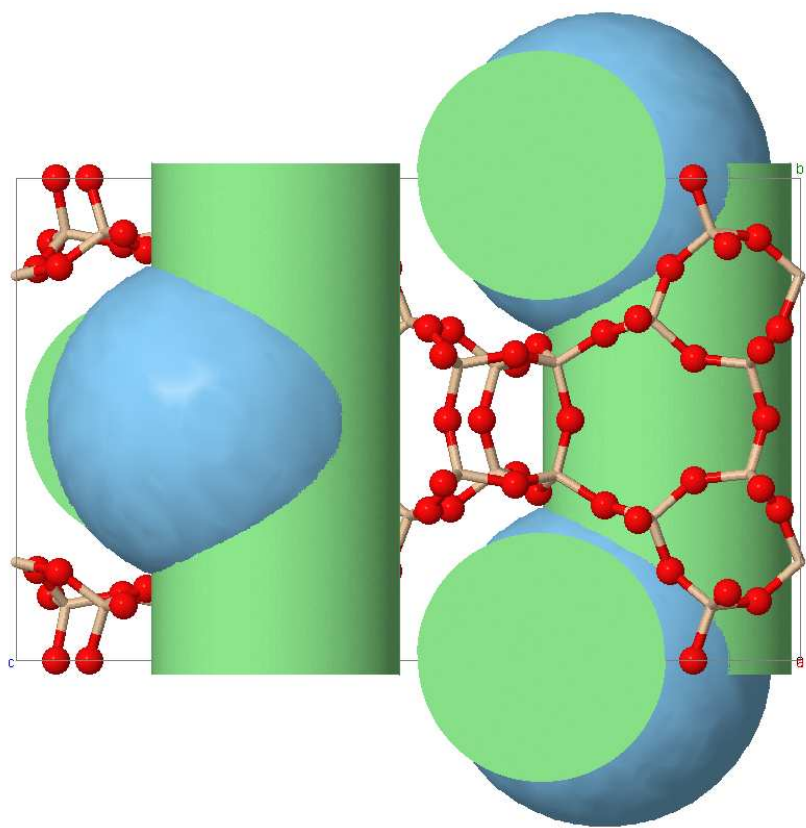

Figure S95: Main pore system of SAO from ZEOMICS. A unit cell is displayed where channels are green, cages are blue, and oxygen atoms of the zeolite structure are red.

Table S192: Physical properties for SAO.

| Property                            | Value |
|-------------------------------------|-------|
| Pore limiting diameter, PLD [Å]     | 6.9   |
| Largest cavity diameter, LCD [Å]    | 9.3   |
| Solid density [kg m <sup>-3</sup> ] | 1415  |

Table S193: Adsorption and geometric properties for SAO.

| Property                                                  | CO <sub>2</sub> | N <sub>2</sub> |
|-----------------------------------------------------------|-----------------|----------------|
| Henry constant [mol kg <sup>-1</sup> kPa <sup>-1</sup> ]  | 0.00321         | 0.00107        |
| Heat of adsorption at 298 K [kJ mol <sup>-1</sup> ]       | 20.6            | 9.5            |
| Accessible volume [cm <sup>3</sup> g <sup>-1</sup> ]      | 0.398           | 0.398          |
| Accessible surface area [m <sup>2</sup> g <sup>-1</sup> ] | 2018            | 2018           |

Table S194: Performance metrics for SAO.

| Property                                                          | Value   |
|-------------------------------------------------------------------|---------|
| Shape selectivity                                                 | –       |
| Size selectivity                                                  | –       |
| Adsorption selectivity                                            | 3.00    |
| Minimum parasitic energy [kJ/kg CO <sub>2</sub> ]                 | 3237.27 |
| Purity [%] at minimum parasitic energy                            | 39.68   |
| Cost [\$ /ton of CO <sub>2</sub> captured and compressed]         | 35.18   |
| Purity [%] at optimum cost                                        | 69.90   |
| Recovery [%] at optimum cost                                      | 70.40   |
| Energy penalty [kWh/ton CO <sub>2</sub> captured] at optimum cost | 192.04  |

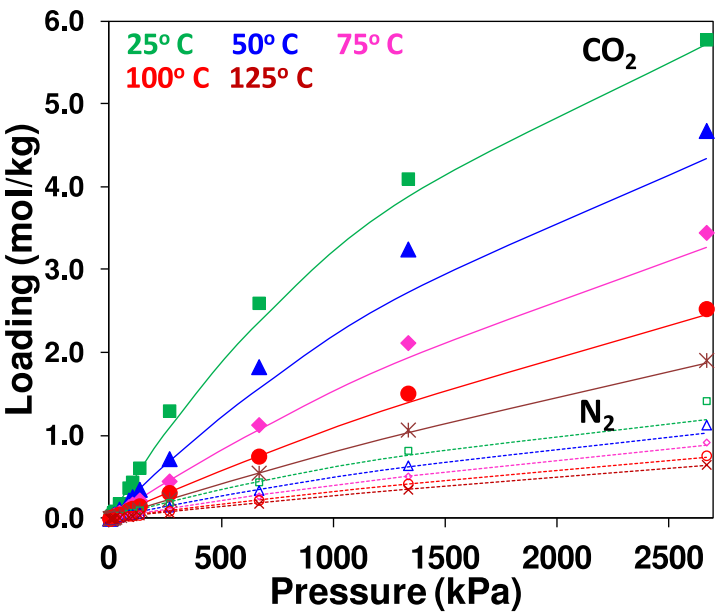

Figure S96: Adsorption isotherms of SAO. Symbols represent GCMC data, and lines represent predictions using the fitted dual-site Langmuir model (solid lines are for CO<sub>2</sub> and dashed lines are for N<sub>2</sub>).

Table S195: Dual-site Langmuir isotherm parameters for SAO.

| Parameter                                 | CO <sub>2</sub>       | N <sub>2</sub>        |
|-------------------------------------------|-----------------------|-----------------------|
| <u>Site 1</u>                             |                       |                       |
| $q^{sat}$ [mol kg <sup>-1</sup> ]         | 6.94                  | 3.76                  |
| $b^o$ [m <sup>3</sup> mol <sup>-1</sup> ] | $4.00 \times 10^{-6}$ | 0                     |
| $\Delta U$ [kJ mol <sup>-1</sup> ]        | 14.12                 | 36.52                 |
| <u>Site 2</u>                             |                       |                       |
| $q^{sat}$ [mol kg <sup>-1</sup> ]         | 6.94                  | 6.94                  |
| $b^o$ [m <sup>3</sup> mol <sup>-1</sup> ] | $3.00 \times 10^{-6}$ | $1.60 \times 10^{-5}$ |
| $\Delta U$ [kJ mol <sup>-1</sup> ]        | 12.38                 | 7.13                  |



SGT

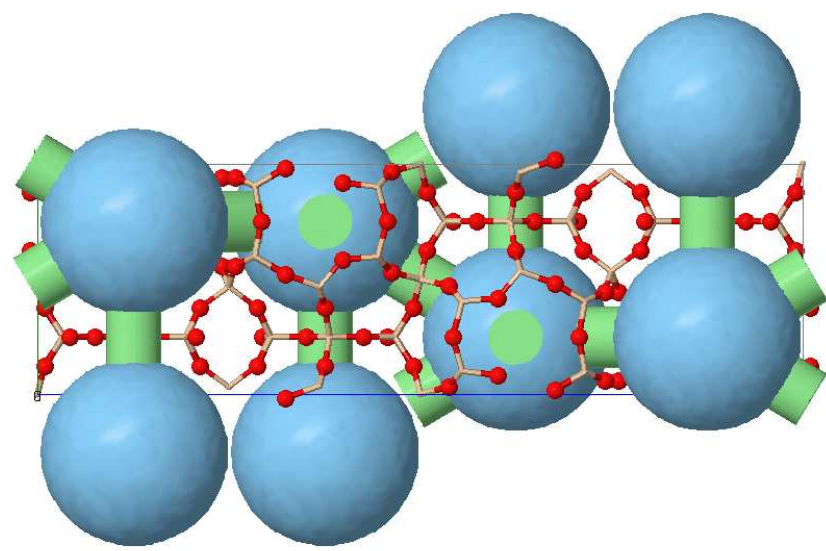

Figure S97: Main pore system of SGT from ZEOMICS. A unit cell is displayed where channels are green, cages are blue, and oxygen atoms of the zeolite structure are red.

Table S196: Physical properties for SGT.

| Property                            | Value |
|-------------------------------------|-------|
| Pore limiting diameter, PLD [Å]     | 2.7   |
| Largest cavity diameter, LCD [Å]    | 8.4   |
| Solid density [kg m <sup>-3</sup> ] | 1742  |

Table S197: Adsorption and geometric properties for SGT.

| Property                                                  | CO <sub>2</sub> | N <sub>2</sub> |
|-----------------------------------------------------------|-----------------|----------------|
| Henry constant [mol kg <sup>-1</sup> kPa <sup>-1</sup> ]  | 0.00583         | 0.00103        |
| Heat of adsorption at 298 K [kJ mol <sup>-1</sup> ]       | 22.5            | 14.2           |
| Accessible volume [cm <sup>3</sup> g <sup>-1</sup> ]      | –               | –              |
| Accessible surface area [m <sup>2</sup> g <sup>-1</sup> ] | –               | –              |

Table S198: Performance metrics for SGT.

| Property                                                          | Value  |
|-------------------------------------------------------------------|--------|
| Shape selectivity                                                 | 0.27   |
| Size selectivity                                                  | –      |
| Adsorption selectivity                                            | 5.65   |
| Minimum parasitic energy [kJ/kg CO <sub>2</sub> ]                 | –      |
| Purity [%] at minimum parasitic energy                            | –      |
| Cost [\$ /ton of CO <sub>2</sub> captured and compressed]         | 46.05  |
| Purity [%] at optimum cost                                        | 89.91  |
| Recovery [%] at optimum cost                                      | 48.67  |
| Energy penalty [kWh/ton CO <sub>2</sub> captured] at optimum cost | 353.21 |

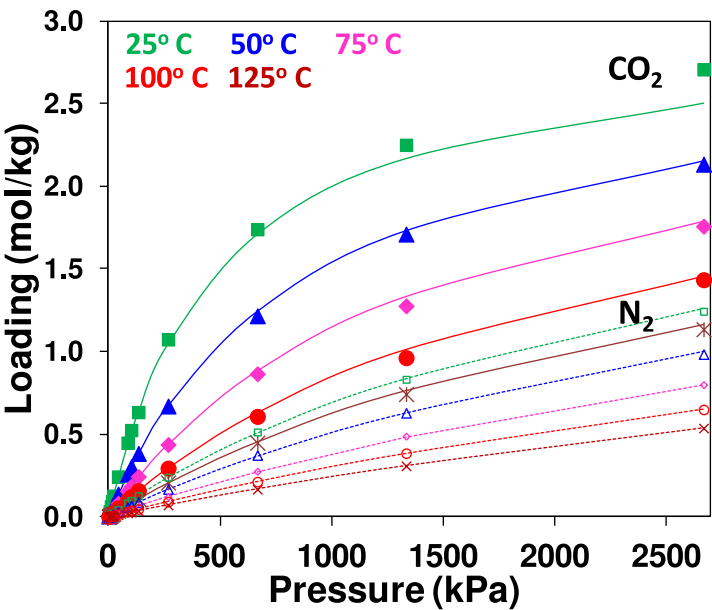

Figure S98: Adsorption isotherms of SGT. Symbols represent GCMC data, and lines represent predictions using the fitted dual-site Langmuir model (solid lines are for CO<sub>2</sub> and dashed lines are for N<sub>2</sub>).

Table S199: Dual-site Langmuir isotherm parameters for SGT.

| Parameter                                 | CO <sub>2</sub>       | N <sub>2</sub>        |
|-------------------------------------------|-----------------------|-----------------------|
| <u>Site 1</u>                             |                       |                       |
| $q^{sat}$ [mol kg <sup>-1</sup> ]         | 3.25                  | 1.35                  |
| $b^o$ [m <sup>3</sup> mol <sup>-1</sup> ] | $5.00 \times 10^{-6}$ | $7.10 \times 10^{-5}$ |
| $\Delta U$ [kJ mol <sup>-1</sup> ]        | 16.77                 | 4.57                  |
| <u>Site 2</u>                             |                       |                       |
| $q^{sat}$ [mol kg <sup>-1</sup> ]         | 0.20                  | 2.58                  |
| $b^o$ [m <sup>3</sup> mol <sup>-1</sup> ] | 0                     | $5.00 \times 10^{-6}$ |
| $\Delta U$ [kJ mol <sup>-1</sup> ]        | 0                     | 12.60                 |

SIV

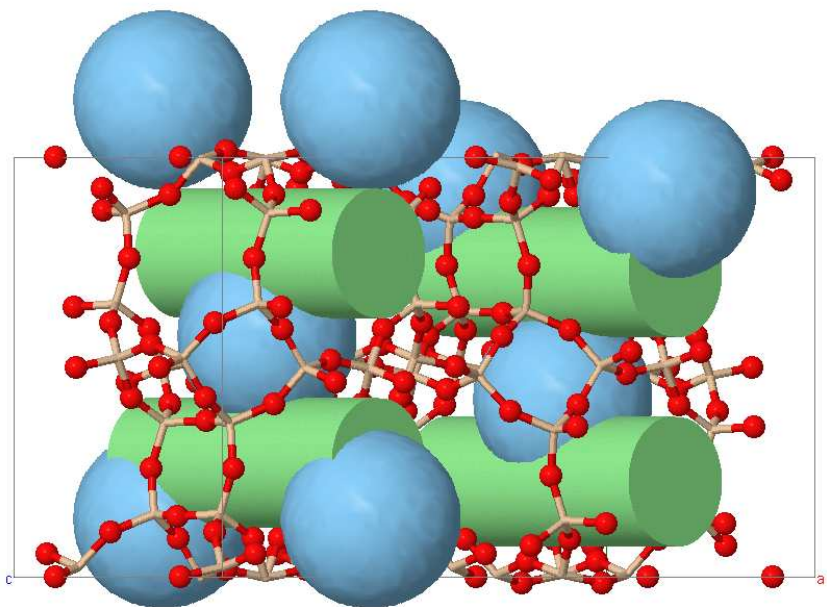

Figure S99: Main pore system of SIV from ZEOMICS. A unit cell is displayed where channels are green, cages are blue, and oxygen atoms of the zeolite structure are red.

Table S200: Physical properties for SIV.

| Property                            | Value |
|-------------------------------------|-------|
| Pore limiting diameter, PLD [Å]     | 4.4   |
| Largest cavity diameter, LCD [Å]    | 6.0   |
| Solid density [kg m <sup>-3</sup> ] | 1633  |

Table S201: Adsorption and geometric properties for SIV.

| Property                                                  | CO <sub>2</sub> | N <sub>2</sub> |
|-----------------------------------------------------------|-----------------|----------------|
| Henry constant [mol kg <sup>-1</sup> kPa <sup>-1</sup> ]  | 0.10188         | 0.00114        |
| Heat of adsorption at 298 K [kJ mol <sup>-1</sup> ]       | 33.7            | 15.7           |
| Accessible volume [cm <sup>3</sup> g <sup>-1</sup> ]      | 0.361           | 0.361          |
| Accessible surface area [m <sup>2</sup> g <sup>-1</sup> ] | 1252            | 1252           |

Table S202: Performance metrics for SIV.

| Property                                                          | Value  |
|-------------------------------------------------------------------|--------|
| Shape selectivity                                                 | –      |
| Size selectivity                                                  | –      |
| Adsorption selectivity                                            | 89.08  |
| Minimum parasitic energy [kJ/kg CO <sub>2</sub> ]                 | 839.32 |
| Purity [%] at minimum parasitic energy                            | 86.97  |
| Cost [\$ /ton of CO <sub>2</sub> captured and compressed]         | 32.54  |
| Purity [%] at optimum cost                                        | 90.00  |
| Recovery [%] at optimum cost                                      | 90.00  |
| Energy penalty [kWh/ton CO <sub>2</sub> captured] at optimum cost | 191.30 |

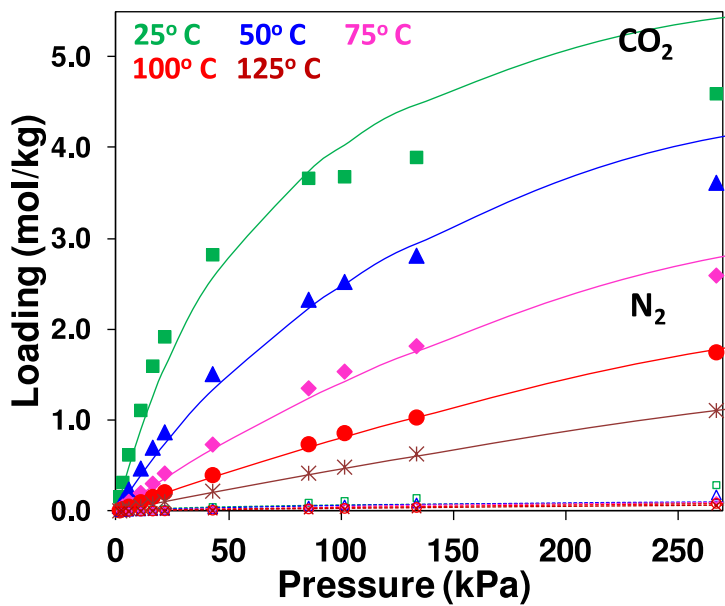

Figure S100: Adsorption isotherms of SIV. Symbols represent GCMC data, and lines represent predictions using the fitted dual-site Langmuir model (solid lines are for CO<sub>2</sub> and dashed lines are for N<sub>2</sub>).

Table S203: Dual-site Langmuir isotherm parameters for SIV.

| Parameter                                 | CO <sub>2</sub>       | N <sub>2</sub>        |
|-------------------------------------------|-----------------------|-----------------------|
| <u>Site 1</u>                             |                       |                       |
| $q^{sat}$ [mol kg <sup>-1</sup> ]         | 7.02                  | 5.26                  |
| $b^o$ [m <sup>3</sup> mol <sup>-1</sup> ] | $8.40 \times 10^{-7}$ | $2.00 \times 10^{-6}$ |
| $\Delta U$ [kJ mol <sup>-1</sup> ]        | 26.27                 | 14.00                 |
| <u>Site 2</u>                             |                       |                       |
| $q^{sat}$ [mol kg <sup>-1</sup> ]         | 6.17                  | 0                     |
| $b^o$ [m <sup>3</sup> mol <sup>-1</sup> ] | 0                     | 0                     |
| $\Delta U$ [kJ mol <sup>-1</sup> ]        | 28.58                 | 20.64                 |

SOD

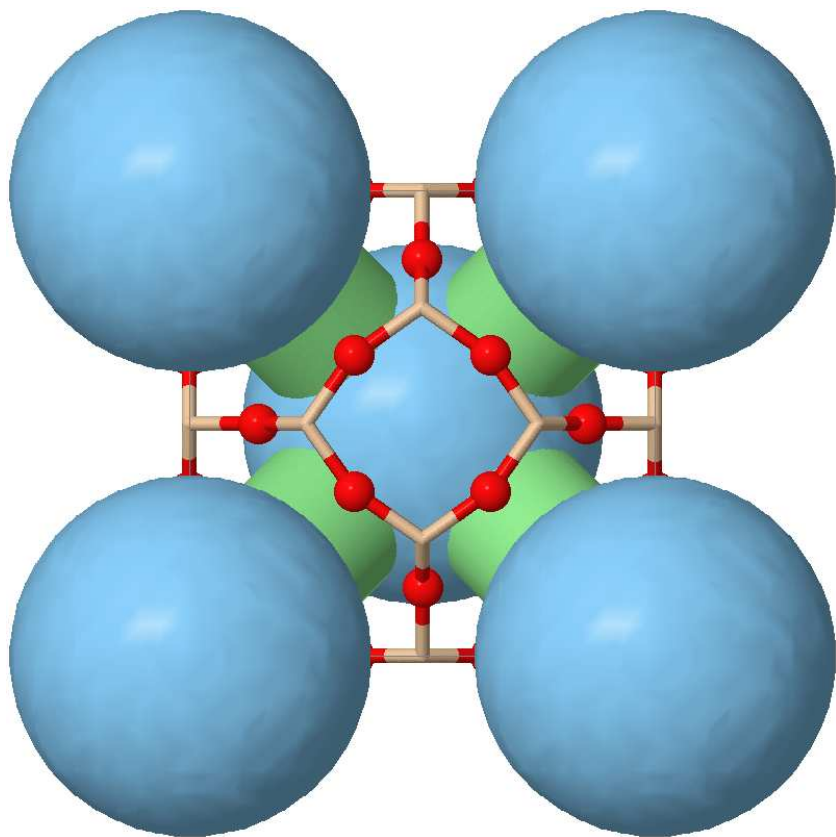

Figure S101: Main pore system of SOD from ZEOMICS. A unit cell is displayed where channels are green, cages are blue, and oxygen atoms of the zeolite structure are red.

Table S204: Physical properties for SOD.

| Property                            | Value |
|-------------------------------------|-------|
| Pore limiting diameter, PLD [Å]     | 3.2   |
| Largest cavity diameter, LCD [Å]    | 7.0   |
| Solid density [kg m <sup>-3</sup> ] | 1662  |

Table S205: Adsorption and geometric properties for SOD.

| Property                                                  | CO <sub>2</sub> | N <sub>2</sub> |
|-----------------------------------------------------------|-----------------|----------------|
| Henry constant [mol kg <sup>-1</sup> kPa <sup>-1</sup> ]  | 0.01152         | 0.00200        |
| Heat of adsorption at 298 K [kJ mol <sup>-1</sup> ]       | 25.1            | 16.4           |
| Accessible volume [cm <sup>3</sup> g <sup>-1</sup> ]      | –               | 0.406          |
| Accessible surface area [m <sup>2</sup> g <sup>-1</sup> ] | –               | 2021           |

Table S206: Performance metrics for SOD.

| Property                                                          | Value  |
|-------------------------------------------------------------------|--------|
| Shape selectivity                                                 | 0.24   |
| Size selectivity                                                  | 1.00   |
| Adsorption selectivity                                            | 5.75   |
| Minimum parasitic energy [kJ/kg CO <sub>2</sub> ]                 | –      |
| Purity [%] at minimum parasitic energy                            | –      |
| Cost [\$ /ton of CO <sub>2</sub> captured and compressed]         | 42.42  |
| Purity [%] at optimum cost                                        | 71.29  |
| Recovery [%] at optimum cost                                      | 63.78  |
| Energy penalty [kWh/ton CO <sub>2</sub> captured] at optimum cost | 298.30 |

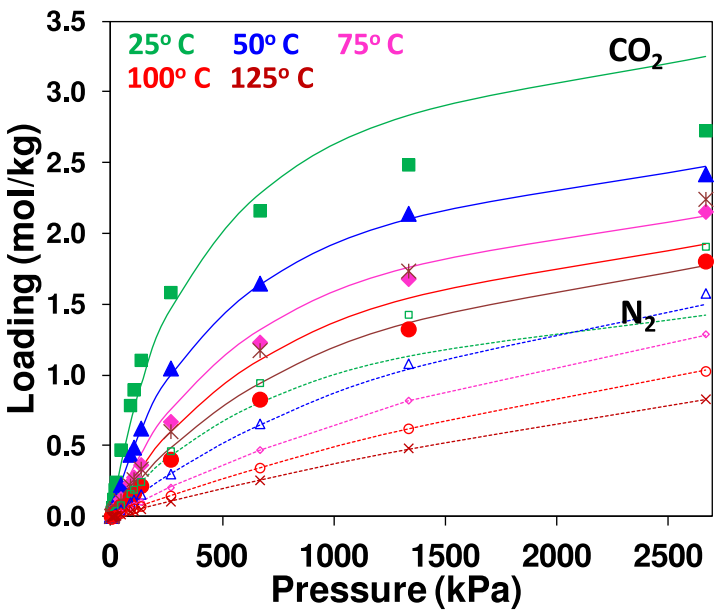

Figure S102: Adsorption isotherms of SOD. Symbols represent GCMC data, and lines represent predictions using the fitted dual-site Langmuir model (solid lines are for CO<sub>2</sub> and dashed lines are for N<sub>2</sub>).

Table S207: Dual-site Langmuir isotherm parameters for SOD.

| Parameter                                 | CO <sub>2</sub>       | N <sub>2</sub>        |
|-------------------------------------------|-----------------------|-----------------------|
| <u>Site 1</u>                             |                       |                       |
| $q^{sat}$ [mol kg <sup>-1</sup> ]         | 3.28                  | 3.28                  |
| $b^o$ [m <sup>3</sup> mol <sup>-1</sup> ] | 0                     | $8.00 \times 10^{-6}$ |
| $\Delta U$ [kJ mol <sup>-1</sup> ]        | 50.00                 | 13.02                 |
| <u>Site 2</u>                             |                       |                       |
| $q^{sat}$ [mol kg <sup>-1</sup> ]         | 2.49                  | 0.69                  |
| $b^o$ [m <sup>3</sup> mol <sup>-1</sup> ] | $1.54 \times 10^{-4}$ | 0                     |
| $\Delta U$ [kJ mol <sup>-1</sup> ]        | 9.81                  | 8.69                  |

TOL

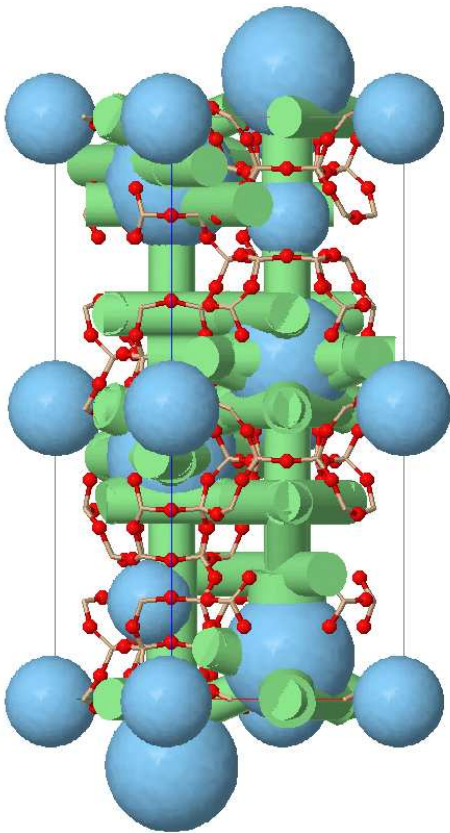

Figure S103: Main pore system of TOL from ZEOMICS. A unit cell is displayed where channels are green, cages are blue, and oxygen atoms of the zeolite structure are red.

Table S208: Physical properties for TOL.

| Property                            | Value |
|-------------------------------------|-------|
| Pore limiting diameter, PLD [Å]     | 2.6   |
| Largest cavity diameter, LCD [Å]    | 7.0   |
| Solid density [kg m <sup>-3</sup> ] | 1782  |

Table S209: Adsorption and geometric properties for TOL.

| Property                                                  | CO <sub>2</sub> | N <sub>2</sub> |
|-----------------------------------------------------------|-----------------|----------------|
| Henry constant [mol kg <sup>-1</sup> kPa <sup>-1</sup> ]  | 0.00234         | 0.00059        |
| Heat of adsorption at 298 K [kJ mol <sup>-1</sup> ]       | 2.5             | 14.1           |
| Accessible volume [cm <sup>3</sup> g <sup>-1</sup> ]      | –               | –              |
| Accessible surface area [m <sup>2</sup> g <sup>-1</sup> ] | –               | –              |

Table S210: Performance metrics for TOL.

| Property                                                          | Value  |
|-------------------------------------------------------------------|--------|
| Shape selectivity                                                 | 0.41   |
| Size selectivity                                                  | –      |
| Adsorption selectivity                                            | 3.97   |
| Minimum parasitic energy [kJ/kg CO <sub>2</sub> ]                 | –      |
| Purity [%] at minimum parasitic energy                            | –      |
| Cost [\$ /ton of CO <sub>2</sub> captured and compressed]         | 38.24  |
| Purity [%] at optimum cost                                        | 57.32  |
| Recovery [%] at optimum cost                                      | 74.56  |
| Energy penalty [kWh/ton CO <sub>2</sub> captured] at optimum cost | 182.09 |

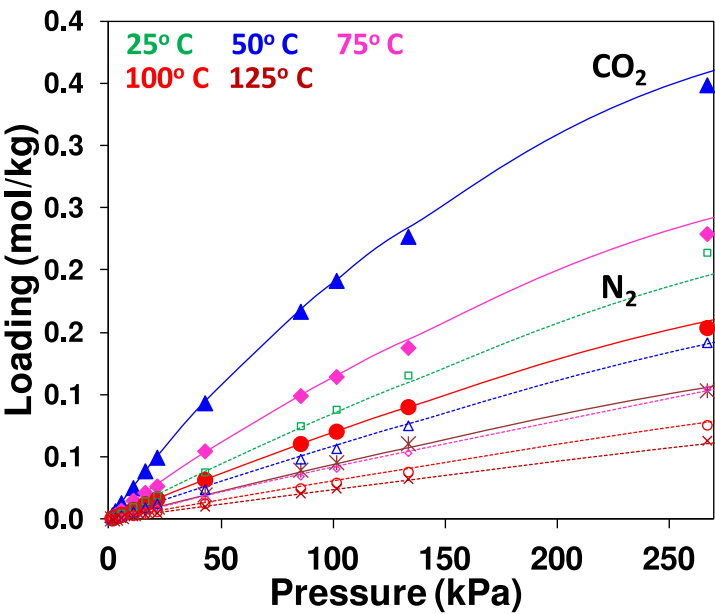

Figure S104: Adsorption isotherms of TOL. Symbols represent GCMC data, and lines represent predictions using the fitted dual-site Langmuir model (solid lines are for CO<sub>2</sub> and dashed lines are for N<sub>2</sub>).

Table S211: Dual-site Langmuir isotherm parameters for TOL.

| Parameter                                 | CO <sub>2</sub>       | N <sub>2</sub>        |
|-------------------------------------------|-----------------------|-----------------------|
| <u>Site 1</u>                             |                       |                       |
| $q^{sat}$ [mol kg <sup>-1</sup> ]         | 0.90                  | 0.90                  |
| $b^o$ [m <sup>3</sup> mol <sup>-1</sup> ] | 0                     | $3.80 \times 10^{-5}$ |
| $\Delta U$ [kJ mol <sup>-1</sup> ]        | 12.61                 | 10.42                 |
| <u>Site 2</u>                             |                       |                       |
| $q^{sat}$ [mol kg <sup>-1</sup> ]         | 0.90                  | 0                     |
| $b^o$ [m <sup>3</sup> mol <sup>-1</sup> ] | $3.00 \times 10^{-6}$ | $2.40 \times 10^{-5}$ |
| $\Delta U$ [kJ mol <sup>-1</sup> ]        | 20.88                 | 10.78                 |



TON

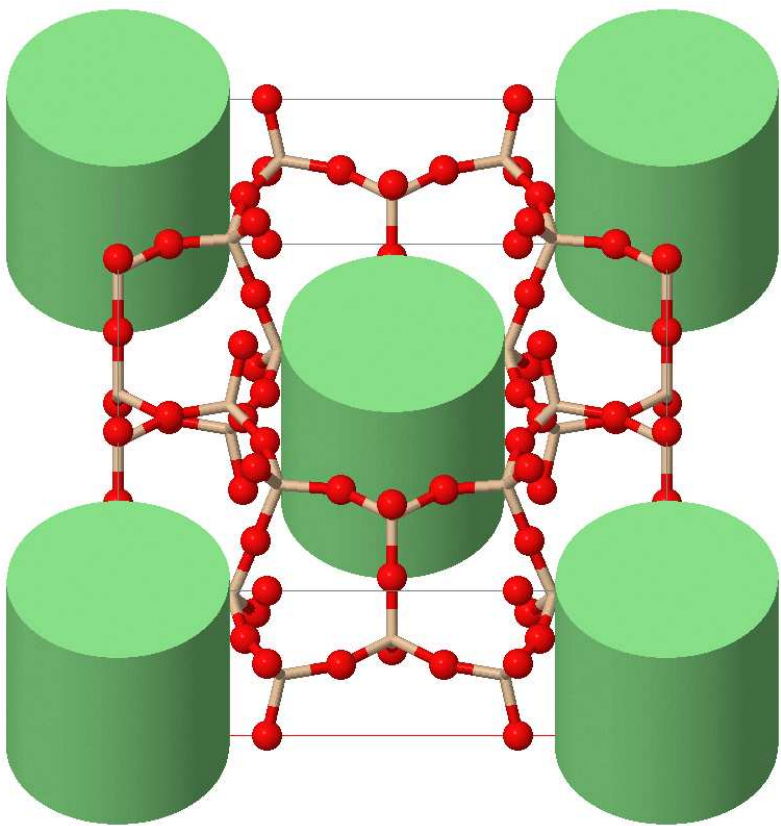

Figure S105: Main pore system of TON from ZEOMICS. A unit cell is displayed where channels are green, cages are blue, and oxygen atoms of the zeolite structure are red.

Table S212: Physical properties for TON.

| Property                            | Value |
|-------------------------------------|-------|
| Pore limiting diameter, PLD [Å]     | 5.7   |
| Largest cavity diameter, LCD [Å]    | 5.7   |
| Solid density [kg m <sup>-3</sup> ] | 1810  |

Table S213: Adsorption and geometric properties for TON.

| Property                                                  | CO <sub>2</sub> | N <sub>2</sub> |
|-----------------------------------------------------------|-----------------|----------------|
| Henry constant [mol kg <sup>-1</sup> kPa <sup>-1</sup> ]  | 0.00887         | 0.00046        |
| Heat of adsorption at 298 K [kJ mol <sup>-1</sup> ]       | 26.5            | 10.7           |
| Accessible volume [cm <sup>3</sup> g <sup>-1</sup> ]      | 0.126           | 0.179          |
| Accessible surface area [m <sup>2</sup> g <sup>-1</sup> ] | 653             | 1468           |

Table S214: Performance metrics for TON.

| Property                                                          | Value   |
|-------------------------------------------------------------------|---------|
| Shape selectivity                                                 | –       |
| Size selectivity                                                  | 0.30    |
| Adsorption selectivity                                            | 19.21   |
| Minimum parasitic energy [kJ/kg CO <sub>2</sub> ]                 | 1606.28 |
| Purity [%] at minimum parasitic energy                            | 66.50   |
| Cost [\$ /ton of CO <sub>2</sub> captured and compressed]         | 28.93   |
| Purity [%] at optimum cost                                        | 90.81   |
| Recovery [%] at optimum cost                                      | 90.43   |
| Energy penalty [kWh/ton CO <sub>2</sub> captured] at optimum cost | 159.32  |

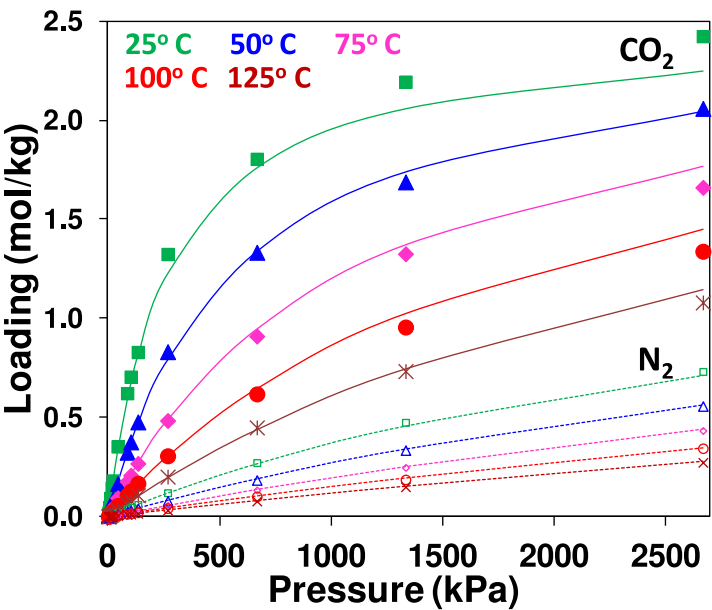

Figure S106: Adsorption isotherms of TON. Symbols represent GCMC data, and lines represent predictions using the fitted dual-site Langmuir model (solid lines are for CO<sub>2</sub> and dashed lines are for N<sub>2</sub>).

Table S215: Dual-site Langmuir isotherm parameters for TON.

| Parameter                                 | CO <sub>2</sub>       | N <sub>2</sub>        |
|-------------------------------------------|-----------------------|-----------------------|
| <u>Site 1</u>                             |                       |                       |
| $q^{sat}$ [mol kg <sup>-1</sup> ]         | 2.71                  | 1.63                  |
| $b^o$ [m <sup>3</sup> mol <sup>-1</sup> ] | 0                     | $1.20 \times 10^{-5}$ |
| $\Delta U$ [kJ mol <sup>-1</sup> ]        | 3.09                  | 10.27                 |
| <u>Site 2</u>                             |                       |                       |
| $q^{sat}$ [mol kg <sup>-1</sup> ]         | 2.48                  | 0.02                  |
| $b^o$ [m <sup>3</sup> mol <sup>-1</sup> ] | $2.00 \times 10^{-6}$ | 0                     |
| $\Delta U$ [kJ mol <sup>-1</sup> ]        | 21.11                 | 50.00                 |

VNI

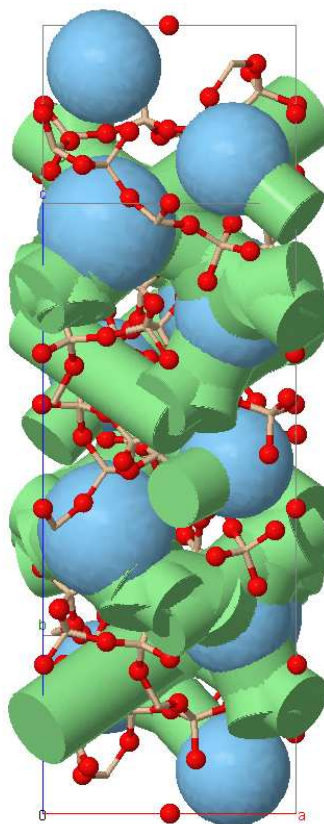

Figure S107: Main pore system of VNI from ZEOMICS. A unit cell is displayed where channels are green, cages are blue, and oxygen atoms of the zeolite structure are red.

Table S216: Physical properties for VNI.

| Property                            | Value |
|-------------------------------------|-------|
| Pore limiting diameter, PLD [Å]     | 3.2   |
| Largest cavity diameter, LCD [Å]    | 5.4   |
| Solid density [kg m <sup>-3</sup> ] | 1753  |

Table S217: Adsorption and geometric properties for VNI.

| Property                                                  | CO <sub>2</sub> | N <sub>2</sub> |
|-----------------------------------------------------------|-----------------|----------------|
| Henry constant [mol kg <sup>-1</sup> kPa <sup>-1</sup> ]  | 0.00708         | 0.00045        |
| Heat of adsorption at 298 K [kJ mol <sup>-1</sup> ]       | 30.5            | 17.4           |
| Accessible volume [cm <sup>3</sup> g <sup>-1</sup> ]      | –               | 0.078          |
| Accessible surface area [m <sup>2</sup> g <sup>-1</sup> ] | –               | 376            |

Table S218: Performance metrics for VNI.

| Property                                                          | Value   |
|-------------------------------------------------------------------|---------|
| Shape selectivity                                                 | –       |
| Size selectivity                                                  | 1.00    |
| Adsorption selectivity                                            | 15.86   |
| Minimum parasitic energy [kJ/kg CO <sub>2</sub> ]                 | 2297.32 |
| Purity [%] at minimum parasitic energy                            | 58.57   |
| Cost [\$ /ton of CO <sub>2</sub> captured and compressed]         | 28.11   |
| Purity [%] at optimum cost                                        | 90.12   |
| Recovery [%] at optimum cost                                      | 90.63   |
| Energy penalty [kWh/ton CO <sub>2</sub> captured] at optimum cost | 167.60  |

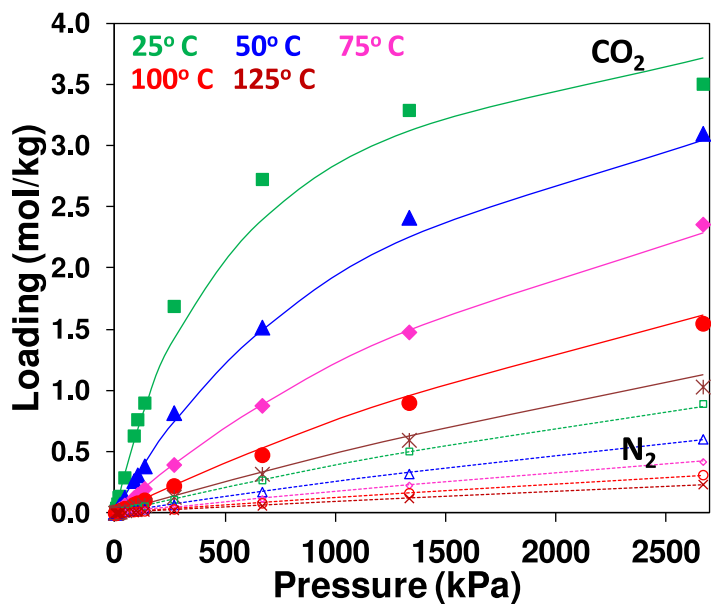

Figure S108: Adsorption isotherms of VNI. Symbols represent GCMC data, and lines represent predictions using the fitted dual-site Langmuir model (solid lines are for CO<sub>2</sub> and dashed lines are for N<sub>2</sub>).

Table S219: Dual-site Langmuir isotherm parameters for VNI.

| Parameter                                 | CO <sub>2</sub>       | N <sub>2</sub>        |
|-------------------------------------------|-----------------------|-----------------------|
| <u>Site 1</u>                             |                       |                       |
| $q^{sat}$ [mol kg <sup>-1</sup> ]         | 4.21                  | 4.21                  |
| $b^o$ [m <sup>3</sup> mol <sup>-1</sup> ] | $6.30 \times 10^{-5}$ | $2.00 \times 10^{-6}$ |
| $\Delta U$ [kJ mol <sup>-1</sup> ]        | 0                     | 12.24                 |
| <u>Site 2</u>                             |                       |                       |
| $q^{sat}$ [mol kg <sup>-1</sup> ]         | 4.21                  | 0.01                  |
| $b^o$ [m <sup>3</sup> mol <sup>-1</sup> ] | $1.70 \times 10^{-7}$ | 0                     |
| $\Delta U$ [kJ mol <sup>-1</sup> ]        | 25.28                 | 35.14                 |

WEI

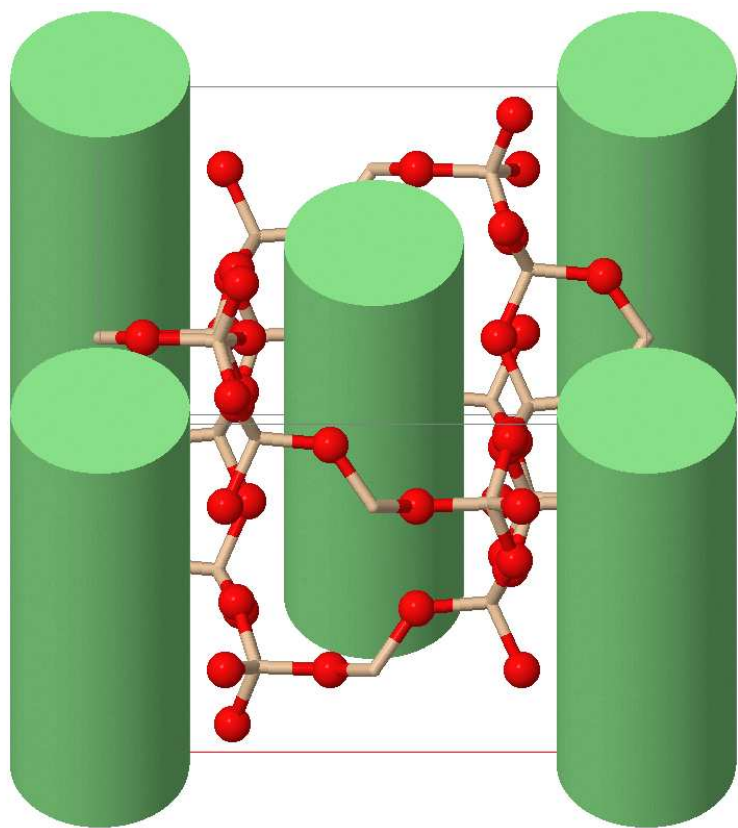

Figure S109: Main pore system of WEI from ZEOMICS. A unit cell is displayed where channels are green, cages are blue, and oxygen atoms of the zeolite structure are red.

Table S220: Physical properties for WEI.

| Property                            | Value |
|-------------------------------------|-------|
| Pore limiting diameter, PLD [Å]     | 3.9   |
| Largest cavity diameter, LCD [Å]    | 3.9   |
| Solid density [kg m <sup>-3</sup> ] | 1647  |

Table S221: Adsorption and geometric properties for WEI.

| Property                                                  | CO <sub>2</sub> | N <sub>2</sub> |
|-----------------------------------------------------------|-----------------|----------------|
| Henry constant [mol kg <sup>-1</sup> kPa <sup>-1</sup> ]  | 0.01629         | 0.00009        |
| Heat of adsorption at 298 K [kJ mol <sup>-1</sup> ]       | 30.6            | 24.0           |
| Accessible volume [cm <sup>3</sup> g <sup>-1</sup> ]      | 0.239           | 0.308          |
| Accessible surface area [m <sup>2</sup> g <sup>-1</sup> ] | 1211            | 1988           |

Table S222: Performance metrics for WEI.

| Property                                                          | Value  |
|-------------------------------------------------------------------|--------|
| Shape selectivity                                                 | –      |
| Size selectivity                                                  | 0.22   |
| Adsorption selectivity                                            | 188.5  |
| Minimum parasitic energy [kJ/kg CO <sub>2</sub> ]                 | 732.44 |
| Purity [%] at minimum parasitic energy                            | 95.71  |
| Cost [\$ /ton of CO <sub>2</sub> captured and compressed]         | 27.29  |
| Purity [%] at optimum cost                                        | 90.00  |
| Recovery [%] at optimum cost                                      | 90.00  |
| Energy penalty [kWh/ton CO <sub>2</sub> captured] at optimum cost | 146.95 |

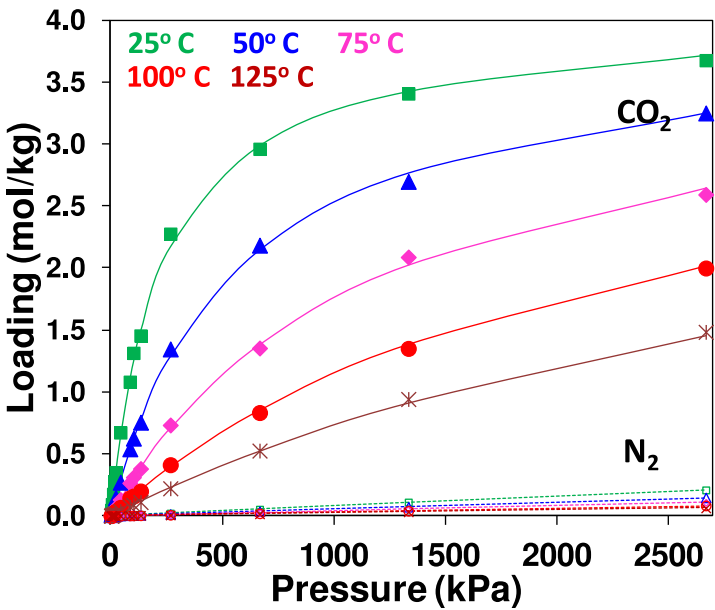

Figure S110: Adsorption isotherms of WEI. Symbols represent GCMC data, and lines represent predictions using the fitted dual-site Langmuir model (solid lines are for CO<sub>2</sub> and dashed lines are for N<sub>2</sub>).

Table S223: Dual-site Langmuir isotherm parameters for WEI.

| Parameter                                 | CO <sub>2</sub>       | N <sub>2</sub>        |
|-------------------------------------------|-----------------------|-----------------------|
| <u>Site 1</u>                             |                       |                       |
| $q^{sat}$ [mol kg <sup>-1</sup> ]         | 4.41                  | 4.41                  |
| $b^o$ [m <sup>3</sup> mol <sup>-1</sup> ] | $1.60 \times 10^{-5}$ | $1.00 \times 10^{-6}$ |
| $\Delta U$ [kJ mol <sup>-1</sup> ]        | 0                     | 9.29                  |
| <u>Site 2</u>                             |                       |                       |
| $q^{sat}$ [mol kg <sup>-1</sup> ]         | 4.41                  | 0                     |
| $b^o$ [m <sup>3</sup> mol <sup>-1</sup> ] | $2.10 \times 10^{-7}$ | $1.00 \times 10^{-6}$ |
| $\Delta U$ [kJ mol <sup>-1</sup> ]        | 26.73                 | 17.47                 |

ZON

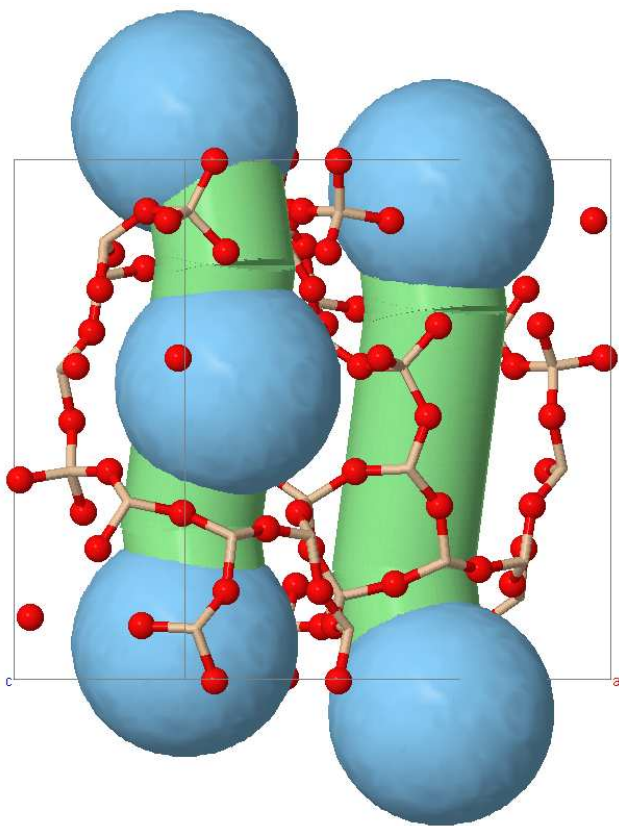

Figure S111: Main pore system of ZON from ZEOMICS. A unit cell is displayed where channels are green, cages are blue, and oxygen atoms of the zeolite structure are red.

Table S224: Physical properties for ZON.

| Property                            | Value |
|-------------------------------------|-------|
| Pore limiting diameter, PLD [Å]     | 4.0   |
| Largest cavity diameter, LCD [Å]    | 6.5   |
| Solid density [kg m <sup>-3</sup> ] | 1801  |

Table S225: Adsorption and geometric properties for ZON.

| Property                                                  | CO <sub>2</sub> | N <sub>2</sub> |
|-----------------------------------------------------------|-----------------|----------------|
| Henry constant [mol kg <sup>-1</sup> kPa <sup>-1</sup> ]  | 0.01537         | 0.00112        |
| Heat of adsorption at 298 K [kJ mol <sup>-1</sup> ]       | 27.6            | 15.1           |
| Accessible volume [cm <sup>3</sup> g <sup>-1</sup> ]      | 0.238           | 0.288          |
| Accessible surface area [m <sup>2</sup> g <sup>-1</sup> ] | 1248            | 1662           |

Table S226: Performance metrics for ZON.

| Property                                                          | Value   |
|-------------------------------------------------------------------|---------|
| Shape selectivity                                                 | –       |
| Size selectivity                                                  | 0.17    |
| Adsorption selectivity                                            | 13.77   |
| Minimum parasitic energy [kJ/kg CO <sub>2</sub> ]                 | 1650.66 |
| Purity [%] at minimum parasitic energy                            | 60.32   |
| Cost [\$ /ton of CO <sub>2</sub> captured and compressed]         | 33.09   |
| Purity [%] at optimum cost                                        | 90.00   |
| Recovery [%] at optimum cost                                      | 90.00   |
| Energy penalty [kWh/ton CO <sub>2</sub> captured] at optimum cost | 211.08  |

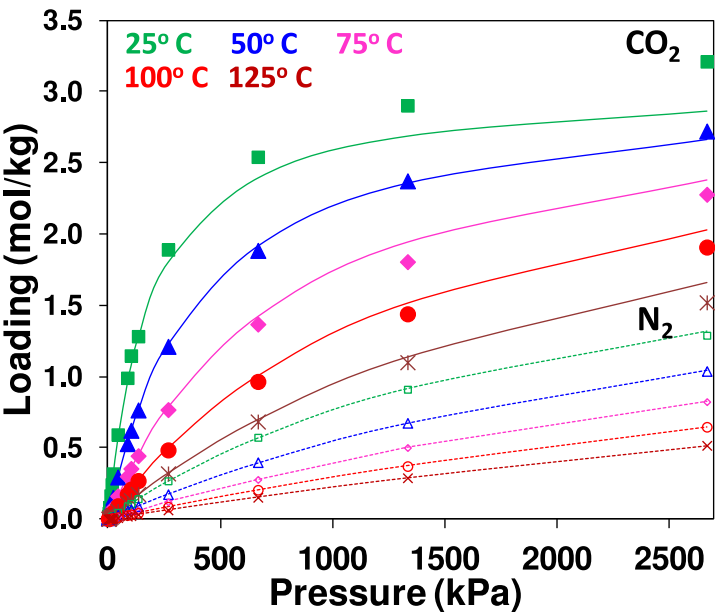

Figure S112: Adsorption isotherms of ZON. Symbols represent GCMC data, and lines represent predictions using the fitted dual-site Langmuir model (solid lines are for CO<sub>2</sub> and dashed lines are for N<sub>2</sub>).

Table S227: Dual-site Langmuir isotherm parameters for ZON.

| Parameter                                 | CO <sub>2</sub>       | N <sub>2</sub>        |
|-------------------------------------------|-----------------------|-----------------------|
| <u>Site 1</u>                             |                       |                       |
| $q^{sat}$ [mol kg <sup>-1</sup> ]         | 3.85                  | 2.35                  |
| $b^o$ [m <sup>3</sup> mol <sup>-1</sup> ] | 0                     | $9.00 \times 10^{-6}$ |
| $\Delta U$ [kJ mol <sup>-1</sup> ]        | 2.67                  | 12.08                 |
| <u>Site 2</u>                             |                       |                       |
| $q^{sat}$ [mol kg <sup>-1</sup> ]         | 3.06                  | 0                     |
| $b^o$ [m <sup>3</sup> mol <sup>-1</sup> ] | $2.00 \times 10^{-6}$ | 0                     |
| $\Delta U$ [kJ mol <sup>-1</sup> ]        | 21.78                 | 31.83                 |
